# Supplementary material for: Transcriptomic Response to Nitric Oxide Treatment in Larix olgensis Henry
Source: Int J Mol Sci. 2015 Dec 2;16(12):28582–97. doi: 10.3390/ijms161226117 (PMC4691064; doi:10.3390/ijms161226117)
Supplement: Supplementary file 1 [file ijms-16-26117-s001.zip › ijms-101635-Supplementary tables.xls]

## Sheet: Table S1
Table S1. Unigene of clusters of orthologous groups (COG) classification.
Code	Functional-Categories	Gene-Number	Genes
A	RNA processing and modification	185	CL4438.Contig1_All,COG5147	CL4608.Contig1_All,COG5147	CL4608.Contig2_All,COG5147	CL5037.Contig1_All,COG5147	CL5037.Contig2_All,COG5147	CL5375.Contig1_All,COG5147	CL5375.Contig2_All,COG5147	CL5491.Contig1_All,COG5200	CL5491.Contig2_All,COG5200	CL5558.Contig1_All,COG5180	CL5558.Contig2_All,COG5180	CL6324.Contig1_All,COG5147	CL6324.Contig2_All,COG5147	CL6455.Contig1_All,COG5176	CL6455.Contig2_All,COG5176	CL6470.Contig1_All,COG5147	Unigene100_All,COG5176	Unigene143_All,COG5147	Unigene149_All,COG5623	Unigene173_All,COG5147	Unigene626_All,COG5161	Unigene757_All,COG5147	Unigene1459_All,COG5147	Unigene2085_All,COG5200	Unigene2370_All,COG5147	Unigene2511_All,COG5186	Unigene2753_All,COG5147	Unigene3196_All,COG5147	Unigene3323_All,COG5178	Unigene3736_All,COG5147	Unigene3763_All,COG5239	Unigene4182_All,COG5104	Unigene4235_All,COG5178	Unigene4922_All,COG5182	Unigene4942_All,COG5181	Unigene5026_All,COG5136	Unigene5038_All,COG5147	Unigene5040_All,COG5147	Unigene5070_All,COG5104	Unigene5074_All,COG5226	Unigene5134_All,COG5147	Unigene5251_All,COG5161	Unigene5285_All,COG5180	Unigene5805_All,COG5147	Unigene5991_All,COG5147	Unigene6068_All,COG5147	Unigene6603_All,COG5147
B	Chromatin structure and dynamics	275	CL4670.Contig3_All,COG5648	CL4832.Contig1_All,COG5531	CL4832.Contig2_All,COG5531	CL4832.Contig3_All,COG5531	CL4854.Contig2_All,COG2036	CL5093.Contig1_All,COG0123	CL5332.Contig1_All,COG2036	CL5436.Contig1_All,COG5032	CL5436.Contig2_All,COG5032	CL5484.Contig1_All,COG5165	CL5484.Contig2_All,COG5165	CL5484.Contig2_All,COG5648	CL5822.Contig1_All,COG2036	CL5822.Contig2_All,COG2036	CL5877.Contig1_All,COG5137	CL5877.Contig2_All,COG5137	CL5877.Contig3_All,COG5137	CL5877.Contig4_All,COG5137	CL5877.Contig5_All,COG5137	CL5942.Contig1_All,COG5137	CL5942.Contig2_All,COG5137	CL6199.Contig1_All,COG5531	CL6199.Contig2_All,COG5531	CL6285.Contig1_All,COG5531	CL6285.Contig2_All,COG5531	CL6429.Contig1_All,COG5076	Unigene99_All,COG5602	Unigene99_All,COG5648	Unigene166_All,COG1243	Unigene178_All,COG0123	Unigene549_All,COG5259	Unigene669_All,COG5262	Unigene844_All,COG5137	Unigene1158_All,COG5137	Unigene1390_All,COG5648	Unigene1426_All,COG2036	Unigene1753_All,COG5137	Unigene1776_All,COG2036	Unigene1867_All,COG5648	Unigene2556_All,COG5032	Unigene2562_All,COG5076	Unigene2947_All,COG5262	Unigene2969_All,COG5076	Unigene2980_All,COG5137	Unigene3005_All,COG5137	Unigene3081_All,COG0123	Unigene3120_All,COG0123
C	Energy production and conversion	855	CL4429.Contig1_All,COG1062	CL4429.Contig2_All,COG1062	CL4436.Contig1_All,COG1529	CL4436.Contig2_All,COG1529	CL4445.Contig1_All,COG1052	CL4506.Contig1_All,COG0843	CL4553.Contig1_All,COG1052	CL4553.Contig2_All,COG1052	CL4617.Contig3_All,COG0526	CL4620.Contig1_All,COG1062	CL4620.Contig2_All,COG1062	CL4627.Contig1_All,COG1062	CL4627.Contig2_All,COG1062	CL4627.Contig3_All,COG1062	CL4641.Contig1_All,COG0281	CL4647.Contig1_All,COG0372	CL4755.Contig1_All,COG0584	CL4755.Contig2_All,COG0584	CL4780.Contig1_All,COG1394	CL4785.Contig1_All,COG1085	CL4785.Contig2_All,COG1085	CL4800.Contig1_All,COG0055	CL4800.Contig2_All,COG0055	CL4878.Contig1_All,COG4656	CL4971.Contig1_All,COG0644	CL4997.Contig1_All,COG4232	CL4997.Contig2_All,COG4232	CL5005.Contig1_All,COG1052	CL5005.Contig2_All,COG1052	CL5040.Contig1_All,COG1005	CL5040.Contig2_All,COG1005	CL5066.Contig1_All,COG1012	CL5066.Contig1_All,COG4230	CL5066.Contig2_All,COG1012	CL5066.Contig2_All,COG4230	CL5078.Contig2_All,COG1038	CL5102.Contig1_All,COG0543	CL5102.Contig1_All,COG1018	CL5102.Contig1_All,COG2871	CL5102.Contig2_All,COG0543	CL5102.Contig2_All,COG1018	CL5102.Contig2_All,COG2871	CL5284.Contig1_All,COG0633	CL5363.Contig1_All,COG1269	CL5363.Contig2_All,COG1269	CL5363.Contig3_All,COG1269	CL5390.Contig1_All,COG1527
D	Cell cycle control, cell division, chromosome partitioning	1033	CL4438.Contig1_All,COG5147	CL4446.Contig1_All,COG0455	CL4452.Contig1_All,COG0455	CL4452.Contig2_All,COG0455	CL4481.Contig1_All,COG1196	CL4481.Contig2_All,COG1196	CL4481.Contig3_All,COG1196	CL4481.Contig4_All,COG1196	CL4565.Contig1_All,COG5126	CL4565.Contig2_All,COG5126	CL4591.Contig1_All,COG0455	CL4591.Contig2_All,COG0455	CL4608.Contig1_All,COG5147	CL4608.Contig2_All,COG5147	CL4659.Contig1_All,COG1196	CL4659.Contig2_All,COG1196	CL4659.Contig3_All,COG1196	CL4692.Contig2_All,COG5024	CL4708.Contig1_All,COG0455	CL4708.Contig1_All,COG1674	CL4874.Contig1_All,COG5657	CL4874.Contig2_All,COG5657	CL4878.Contig1_All,COG0455	CL4941.Contig1_All,COG1196	CL4959.Contig1_All,COG0455	CL4959.Contig2_All,COG0455	CL4962.Contig1_All,COG1196	CL5007.Contig1_All,COG1196	CL5021.Contig1_All,COG1196	CL5021.Contig2_All,COG1196	CL5037.Contig1_All,COG5147	CL5037.Contig2_All,COG5147	CL5060.Contig1_All,COG1196	CL5218.Contig1_All,COG0455	CL5218.Contig4_All,COG0455	CL5218.Contig4_All,COG1674	CL5235.Contig1_All,COG1196	CL5235.Contig2_All,COG1196	CL5264.Contig1_All,COG5024	CL5264.Contig2_All,COG5024	CL5265.Contig1_All,COG5126	CL5265.Contig2_All,COG5126	CL5275.Contig1_All,COG0455	CL5275.Contig2_All,COG0455	CL5275.Contig3_All,COG0455	CL5275.Contig3_All,COG1674	CL5290.Contig1_All,COG0455
E	Amino acid transport and metabolism	1033	CL4410.Contig1_All,COG0334	CL4410.Contig2_All,COG0334	CL4413.Contig1_All,COG0477	CL4445.Contig1_All,COG0111	CL4445.Contig2_All,COG0111	CL4484.Contig1_All,COG0477	CL4530.Contig1_All,COG0133	CL4602.Contig1_All,COG0531	CL4668.Contig1_All,COG0477	CL4677.Contig1_All,COG0814	CL4677.Contig2_All,COG0814	CL4766.Contig1_All,COG0697	CL4766.Contig2_All,COG0697	CL4794.Contig1_All,COG0112	CL4794.Contig2_All,COG0112	CL4891.Contig1_All,COG0147	CL4891.Contig2_All,COG0147	CL4901.Contig1_All,COG0697	CL4901.Contig2_All,COG0697	CL4939.Contig1_All,COG0129	CL4939.Contig2_All,COG0129	CL4965.Contig2_All,COG0834	CL4966.Contig1_All,COG0287	CL4966.Contig2_All,COG0287	CL4976.Contig1_All,COG3104	CL5000.Contig1_All,COG3200	CL5000.Contig2_All,COG3200	CL5072.Contig1_All,COG0477	CL5072.Contig2_All,COG0477	CL5120.Contig2_All,COG3104	CL5122.Contig1_All,COG2939	CL5122.Contig2_All,COG2939	CL5138.Contig1_All,COG1045	CL5138.Contig2_All,COG1045	CL5144.Contig1_All,COG1448	CL5144.Contig2_All,COG1448	CL5193.Contig1_All,COG0697	CL5211.Contig1_All,COG0520	CL5211.Contig2_All,COG0520	CL5314.Contig1_All,COG0069	CL5314.Contig2_All,COG0069	CL5315.Contig1_All,COG0131	CL5315.Contig2_All,COG0131	CL5319.Contig1_All,COG0077	CL5319.Contig2_All,COG0077	CL5349.Contig1_All,COG0697	CL5349.Contig2_All,COG0697
F	Nucleotide transport and metabolism	233	CL4414.Contig1_All,COG0105	CL4436.Contig1_All,COG4631	CL4436.Contig1_All,COG4630	CL4436.Contig2_All,COG4631	CL4569.Contig2_All,COG1957	CL4752.Contig1_All,COG0540	CL4752.Contig2_All,COG0540	CL4824.Contig1_All,COG0044	CL4913.Contig1_All,COG0125	CL4913.Contig2_All,COG0125	CL5221.Contig1_All,COG0518	CL5395.Contig1_All,COG0462	CL5395.Contig2_All,COG0462	CL5452.Contig1_All,COG0572	CL5452.Contig2_All,COG0572	CL5490.Contig1_All,COG0737	CL5490.Contig2_All,COG0737	CL5490.Contig3_All,COG0737	CL5616.Contig2_All,COG0737	CL5673.Contig1_All,COG0737	CL5746.Contig1_All,COG0590	CL5952.Contig1_All,COG0737	CL6029.Contig1_All,COG0044	CL6029.Contig2_All,COG0044	CL6325.Contig1_All,COG1618	CL6325.Contig2_All,COG1618	Unigene45_All,COG1957	Unigene97_All,COG2233	Unigene253_All,COG1816	Unigene353_All,COG0516	Unigene484_All,COG0127	Unigene591_All,COG2233	Unigene798_All,COG0563	Unigene1167_All,COG0138	Unigene1399_All,COG4630	Unigene1918_All,COG0537	Unigene1993_All,COG0572	Unigene2028_All,COG0590	Unigene2704_All,COG0505	Unigene2973_All,COG0035	Unigene3170_All,COG0590	Unigene3266_All,COG1816	Unigene3351_All,COG0537	Unigene4136_All,COG0737	Unigene4920_All,COG0104	Unigene4921_All,COG0104	Unigene5151_All,COG0572
G	Carbohydrate transport and metabolism	1680	CL4413.Contig1_All,COG2271	CL4413.Contig1_All,COG0477	CL4421.Contig1_All,COG5297	CL4421.Contig1_All,COG2273	CL4446.Contig1_All,COG2730	CL4447.Contig1_All,COG2273	CL4447.Contig2_All,COG2273	CL4452.Contig1_All,COG2730	CL4452.Contig2_All,COG2730	CL4464.Contig1_All,COG2730	CL4464.Contig2_All,COG2730	CL4470.Contig1_All,COG2730	CL4470.Contig2_All,COG2730	CL4484.Contig1_All,COG0477	CL4492.Contig1_All,COG5297	CL4494.Contig1_All,COG0702	CL4504.Contig1_All,COG0451	CL4504.Contig2_All,COG0451	CL4591.Contig1_All,COG2730	CL4591.Contig2_All,COG2730	CL4632.Contig2_All,COG0580	CL4657.Contig1_All,COG0297	CL4657.Contig2_All,COG0297	CL4668.Contig1_All,COG0477	CL4676.Contig1_All,COG5297	CL4676.Contig2_All,COG5297	CL4689.Contig1_All,COG0524	CL4689.Contig2_All,COG0524	CL4705.Contig1_All,COG2730	CL4705.Contig2_All,COG2730	CL4708.Contig1_All,COG2730	CL4711.Contig1_All,COG0380	CL4711.Contig2_All,COG0380	CL4711.Contig3_All,COG0380	CL4711.Contig4_All,COG1877	CL4711.Contig5_All,COG0380	CL4711.Contig5_All,COG1877	CL4727.Contig1_All,COG0451	CL4727.Contig2_All,COG0451	CL4766.Contig1_All,COG0697	CL4766.Contig2_All,COG0697	CL4784.Contig1_All,COG0524	CL4806.Contig2_All,COG2273	CL4901.Contig1_All,COG0697	CL4901.Contig2_All,COG0697	CL4939.Contig1_All,COG0129	CL4939.Contig2_All,COG0129
H	Coenzyme transport and metabolism	443	CL4406.Contig1_All,COG5031	CL4406.Contig2_All,COG5031	CL4406.Contig3_All,COG5031	CL4445.Contig1_All,COG0111	CL4445.Contig1_All,COG1052	CL4445.Contig2_All,COG0111	CL4553.Contig1_All,COG1052	CL4553.Contig2_All,COG1052	CL4656.Contig1_All,COG0285	CL4656.Contig2_All,COG0285	CL4656.Contig3_All,COG0285	CL4682.Contig1_All,COG0476	CL4682.Contig2_All,COG0476	CL4682.Contig3_All,COG0476	CL4682.Contig4_All,COG0476	CL4682.Contig5_All,COG0476	CL4682.Contig6_All,COG0476	CL4682.Contig7_All,COG0476	CL4698.Contig1_All,COG0422	CL4712.Contig1_All,COG0142	CL4712.Contig2_All,COG0142	CL4767.Contig1_All,COG1985	CL4767.Contig1_All,COG0117	CL4767.Contig2_All,COG1985	CL4890.Contig1_All,COG0452	CL4891.Contig1_All,COG0147	CL4891.Contig2_All,COG0147	CL4971.Contig1_All,COG1635	CL4991.Contig1_All,COG2227	CL4991.Contig2_All,COG2227	CL5005.Contig1_All,COG1052	CL5005.Contig2_All,COG1052	CL5017.Contig1_All,COG0276	CL5017.Contig2_All,COG0276	CL5102.Contig1_All,COG0543	CL5102.Contig2_All,COG0543	CL5122.Contig1_All,COG0452	CL5122.Contig2_All,COG0452	CL5296.Contig1_All,COG2896	CL5296.Contig2_All,COG2896	CL5456.Contig1_All,COG0452	CL5456.Contig2_All,COG0452	CL5699.Contig1_All,COG0147	CL5699.Contig2_All,COG0512	CL5699.Contig3_All,COG0512	CL5706.Contig1_All,COG0192	CL5706.Contig2_All,COG0192
I	Lipid transport and metabolism	688	CL4428.Contig3_All,COG3675	CL4452.Contig1_All,COG2267	CL4452.Contig2_All,COG2267	CL4485.Contig1_All,COG0318	CL4485.Contig2_All,COG0318	CL4485.Contig3_All,COG0318	CL4485.Contig4_All,COG0318	CL4485.Contig5_All,COG0318	CL4486.Contig1_All,COG0204	CL4486.Contig2_All,COG0204	CL4570.Contig1_All,COG5092	CL4570.Contig2_All,COG5092	CL4643.Contig1_All,COG0236	CL4643.Contig2_All,COG0236	CL4643.Contig3_All,COG0236	CL4830.Contig1_All,COG1022	CL4830.Contig1_All,COG0318	CL4830.Contig2_All,COG1022	CL4864.Contig1_All,COG1024	CL4864.Contig2_All,COG1024	CL4864.Contig3_All,COG1024	CL4864.Contig4_All,COG1024	CL4878.Contig1_All,COG2267	CL4878.Contig2_All,COG2267	CL4895.Contig1_All,COG0318	CL4895.Contig2_All,COG0318	CL4926.Contig2_All,COG2267	CL4935.Contig1_All,COG0657	CL4935.Contig1_All,COG2272	CL4935.Contig2_All,COG0657	CL4935.Contig2_All,COG2272	CL4949.Contig1_All,COG5050	CL4949.Contig2_All,COG5050	CL4983.Contig1_All,COG0020	CL4983.Contig2_All,COG0020	CL5014.Contig1_All,COG1028	CL5054.Contig1_All,COG1022	CL5054.Contig2_All,COG1022	CL5078.Contig1_All,COG4799	CL5078.Contig1_All,COG0439	CL5078.Contig1_All,COG0511	CL5078.Contig1_All,COG4770	CL5078.Contig2_All,COG0439	CL5078.Contig2_All,COG4770	CL5109.Contig1_All,COG0615	CL5109.Contig2_All,COG0615	CL5111.Contig1_All,COG0623
J	Translation, ribosomal structure and biogenesis	1851	CL4446.Contig1_All,COG0532	CL4452.Contig1_All,COG0532	CL4452.Contig2_All,COG0532	CL4493.Contig2_All,COG0513	CL4567.Contig1_All,COG2890	CL4567.Contig1_All,COG2265	CL4567.Contig2_All,COG2265	CL4567.Contig2_All,COG2890	CL4591.Contig1_All,COG1889	CL4591.Contig2_All,COG1889	CL4606.Contig1_All,COG0180	CL4606.Contig1_All,COG0162	CL4606.Contig2_All,COG0180	CL4606.Contig2_All,COG0162	CL4635.Contig2_All,COG1186	CL4650.Contig1_All,COG0060	CL4650.Contig2_All,COG0060	CL4654.Contig1_All,COG3277	CL4654.Contig1_All,COG1889	CL4654.Contig2_All,COG3277	CL4654.Contig2_All,COG1889	CL4674.Contig1_All,COG5225	CL4674.Contig2_All,COG5225	CL4696.Contig1_All,COG0072	CL4696.Contig2_All,COG0072	CL4704.Contig1_All,COG0197	CL4704.Contig2_All,COG0197	CL4708.Contig1_All,COG0532	CL4733.Contig1_All,COG1184	CL4733.Contig1_All,COG0182	CL4778.Contig1_All,COG0097	CL4778.Contig2_All,COG0097	CL4796.Contig1_All,COG0532	CL4805.Contig1_All,COG0184	CL4805.Contig2_All,COG0184	CL4821.Contig1_All,COG2007	CL4821.Contig2_All,COG2007	CL4878.Contig1_All,COG0532	CL4878.Contig2_All,COG0532	CL4885.Contig1_All,COG0102	CL4885.Contig2_All,COG0102	CL4899.Contig1_All,COG1471	CL4899.Contig2_All,COG1471	CL4915.Contig1_All,COG1208	CL4915.Contig2_All,COG1208	CL4915.Contig3_All,COG1208	CL4959.Contig2_All,COG0532
K	Transcription	2141	CL4438.Contig1_All,COG5147	CL4446.Contig1_All,COG1958	CL4446.Contig1_All,COG0515	CL4452.Contig1_All,COG0515	CL4452.Contig2_All,COG0515	CL4464.Contig1_All,COG5164	CL4464.Contig2_All,COG5164	CL4474.Contig2_All,COG0553	CL4477.Contig1_All,COG0515	CL4477.Contig2_All,COG0515	CL4477.Contig3_All,COG0515	CL4477.Contig4_All,COG0515	CL4478.Contig1_All,COG0515	CL4487.Contig1_All,COG0317	CL4493.Contig2_All,COG0513	CL4574.Contig2_All,COG0515	CL4574.Contig3_All,COG0515	CL4591.Contig1_All,COG0515	CL4591.Contig2_All,COG0515	CL4595.Contig1_All,COG0553	CL4608.Contig1_All,COG5147	CL4608.Contig2_All,COG5147	CL4625.Contig1_All,COG0515	CL4625.Contig2_All,COG0515	CL4655.Contig1_All,COG1678	CL4670.Contig3_All,COG5068	CL4678.Contig2_All,COG0515	CL4708.Contig1_All,COG0515	CL4708.Contig1_All,COG0086	CL4743.Contig1_All,COG5248	CL4746.Contig1_All,COG0515	CL4812.Contig1_All,COG0846	CL4812.Contig2_All,COG0846	CL4820.Contig1_All,COG0515	CL4820.Contig2_All,COG0515	CL4829.Contig1_All,COG5641	CL4850.Contig1_All,COG0515	CL4850.Contig2_All,COG0515	CL4855.Contig1_All,COG0515	CL4855.Contig2_All,COG0515	CL4879.Contig1_All,COG0515	CL4879.Contig2_All,COG0515	CL4898.Contig1_All,COG0553	CL4898.Contig2_All,COG0553	CL4922.Contig2_All,COG0515	CL4934.Contig2_All,COG0515	CL4934.Contig3_All,COG0515
L	Replication, recombination and repair	1944	CL4440.Contig1_All,COG3569	CL4440.Contig2_All,COG3569	CL4440.Contig3_All,COG3569	CL4446.Contig1_All,COG0515	CL4452.Contig1_All,COG0515	CL4452.Contig2_All,COG0515	CL4474.Contig2_All,COG0553	CL4477.Contig1_All,COG0515	CL4477.Contig2_All,COG0515	CL4477.Contig3_All,COG0515	CL4477.Contig4_All,COG0515	CL4478.Contig1_All,COG0515	CL4481.Contig2_All,COG0419	CL4481.Contig3_All,COG0419	CL4481.Contig4_All,COG0419	CL4493.Contig2_All,COG0513	CL4574.Contig2_All,COG0515	CL4574.Contig3_All,COG0515	CL4591.Contig1_All,COG0515	CL4591.Contig2_All,COG0515	CL4595.Contig1_All,COG0553	CL4614.Contig1_All,COG0210	CL4614.Contig2_All,COG0210	CL4618.Contig1_All,COG1793	CL4618.Contig2_All,COG1793	CL4625.Contig1_All,COG0515	CL4625.Contig2_All,COG0515	CL4659.Contig1_All,COG0419	CL4659.Contig2_All,COG0419	CL4659.Contig3_All,COG0419	CL4678.Contig2_All,COG0515	CL4708.Contig1_All,COG0515	CL4746.Contig1_All,COG0515	CL4777.Contig1_All,COG0258	CL4814.Contig1_All,COG2801	CL4819.Contig1_All,COG0270	CL4820.Contig1_All,COG0515	CL4820.Contig2_All,COG0515	CL4850.Contig1_All,COG0515	CL4850.Contig2_All,COG0515	CL4855.Contig1_All,COG0515	CL4855.Contig2_All,COG0515	CL4879.Contig1_All,COG0515	CL4879.Contig2_All,COG0515	CL4898.Contig1_All,COG0553	CL4898.Contig2_All,COG0553	CL4922.Contig2_All,COG0515
M	Cell wall/membrane/envelope biogenesis	1222	CL4432.Contig1_All,COG0481	CL4432.Contig2_All,COG0481	CL4446.Contig1_All,COG3206	CL4452.Contig1_All,COG0810	CL4452.Contig1_All,COG3206	CL4452.Contig2_All,COG0810	CL4452.Contig2_All,COG3206	CL4481.Contig1_All,COG3468	CL4494.Contig1_All,COG0702	CL4504.Contig1_All,COG0451	CL4504.Contig2_All,COG0451	CL4591.Contig1_All,COG0810	CL4591.Contig1_All,COG3637	CL4591.Contig2_All,COG0810	CL4591.Contig2_All,COG3637	CL4690.Contig1_All,COG0668	CL4690.Contig2_All,COG0668	CL4708.Contig1_All,COG0810	CL4708.Contig1_All,COG3206	CL4708.Contig1_All,COG3637	CL4727.Contig1_All,COG0451	CL4727.Contig2_All,COG0451	CL4796.Contig1_All,COG3468	CL4796.Contig1_All,COG3064	CL4796.Contig2_All,COG3064	CL4841.Contig1_All,COG3637	CL4878.Contig1_All,COG0810	CL4878.Contig1_All,COG3409	CL4878.Contig2_All,COG0810	CL4878.Contig2_All,COG3409	CL4915.Contig1_All,COG1208	CL4915.Contig2_All,COG1208	CL4915.Contig3_All,COG1208	CL4915.Contig3_All,COG1209	CL4959.Contig1_All,COG3206	CL5007.Contig1_All,COG3064	CL5007.Contig2_All,COG3064	CL5055.Contig1_All,COG5597	CL5109.Contig1_All,COG0615	CL5109.Contig1_All,COG2870	CL5109.Contig2_All,COG0615	CL5109.Contig2_All,COG2870	CL5122.Contig1_All,COG1388	CL5122.Contig1_All,COG5498	CL5122.Contig2_All,COG1388	CL5122.Contig2_All,COG5498	CL5156.Contig1_All,COG3637
N	Cell motility	183	CL4464.Contig1_All,COG5651	CL4464.Contig2_All,COG5651	CL4578.Contig3_All,COG3351	CL5122.Contig1_All,COG5651	CL5122.Contig1_All,COG1705	CL5122.Contig2_All,COG5651	CL5122.Contig2_All,COG1705	CL5275.Contig3_All,COG5651	CL5490.Contig1_All,COG3170	CL5490.Contig2_All,COG3170	CL5490.Contig3_All,COG3170	CL5532.Contig1_All,COG3351	CL5613.Contig1_All,COG1705	CL5673.Contig1_All,COG5651	CL5877.Contig1_All,COG1705	CL5877.Contig2_All,COG1705	CL5877.Contig3_All,COG1705	CL5916.Contig1_All,COG0643	CL5916.Contig2_All,COG0643	CL5947.Contig1_All,COG3351	CL5947.Contig2_All,COG3351	CL5947.Contig3_All,COG3351	CL6223.Contig1_All,COG1317	CL6229.Contig1_All,COG3351	CL6487.Contig1_All,COG5651	Unigene233_All,COG5651	Unigene388_All,COG5651	Unigene388_All,COG1705	Unigene437_All,COG0840	Unigene489_All,COG5651	Unigene739_All,COG5651	Unigene892_All,COG3351	Unigene1690_All,COG5603	Unigene2720_All,COG3351	Unigene2898_All,COG3351	Unigene3005_All,COG1705	Unigene3027_All,COG5651	Unigene5262_All,COG3351	Unigene5375_All,COG1705	Unigene5375_All,COG1317	Unigene5470_All,COG1317	Unigene5470_All,COG1705	Unigene6655_All,COG3170	Unigene7192_All,COG0643	Unigene7403_All,COG1705	Unigene7435_All,COG5651	Unigene7797_All,COG3351
O	Posttranslational modification, protein turnover, chaperones	1816	CL4404.Contig2_All,COG0071	CL4444.Contig2_All,COG5574	CL4446.Contig1_All,COG1404	CL4452.Contig1_All,COG0443	CL4452.Contig2_All,COG0443	CL4459.Contig1_All,COG0652	CL4459.Contig2_All,COG0652	CL4460.Contig1_All,COG0484	CL4460.Contig1_All,COG2214	CL4460.Contig2_All,COG0484	CL4460.Contig2_All,COG2214	CL4461.Contig1_All,COG5044	CL4461.Contig2_All,COG5044	CL4461.Contig3_All,COG5044	CL4522.Contig1_All,COG5187	CL4522.Contig2_All,COG5187	CL4525.Contig1_All,COG5159	CL4555.Contig1_All,COG0638	CL4555.Contig2_All,COG0638	CL4575.Contig1_All,COG5540	CL4584.Contig2_All,COG0484	CL4584.Contig2_All,COG2214	CL4591.Contig1_All,COG1404	CL4591.Contig1_All,COG0443	CL4591.Contig2_All,COG0443	CL4591.Contig2_All,COG1404	CL4595.Contig1_All,COG5243	CL4613.Contig1_All,COG0443	CL4617.Contig3_All,COG0526	CL4617.Contig3_All,COG3118	CL4684.Contig1_All,COG5647	CL4684.Contig2_All,COG5647	CL4686.Contig1_All,COG1222	CL4686.Contig2_All,COG1222	CL4688.Contig1_All,COG1222	CL4688.Contig2_All,COG1222	CL4740.Contig1_All,COG5046	CL4740.Contig2_All,COG5046	CL4740.Contig3_All,COG5046	CL4751.Contig2_All,COG3914	CL4751.Contig3_All,COG3914	CL4772.Contig1_All,COG0484	CL4772.Contig1_All,COG2214	CL4772.Contig2_All,COG0484	CL4772.Contig2_All,COG2214	CL4783.Contig1_All,COG0443	CL4783.Contig2_All,COG0443
P	Inorganic ion transport and metabolism	715	CL4413.Contig1_All,COG0477	CL4471.Contig1_All,COG0659	CL4484.Contig1_All,COG0477	CL4573.Contig1_All,COG1226	CL4573.Contig2_All,COG1226	CL4594.Contig1_All,COG2046	CL4594.Contig2_All,COG2046	CL4668.Contig1_All,COG0477	CL4943.Contig1_All,COG5036	CL4943.Contig2_All,COG5036	CL4945.Contig1_All,COG1118	CL4956.Contig2_All,COG0474	CL4956.Contig3_All,COG0474	CL5044.Contig1_All,COG0025	CL5044.Contig2_All,COG0025	CL5044.Contig2_All,COG3263	CL5072.Contig1_All,COG0477	CL5072.Contig2_All,COG0477	CL5099.Contig1_All,COG0659	CL5099.Contig2_All,COG0659	CL5102.Contig1_All,COG4097	CL5102.Contig1_All,COG0369	CL5102.Contig2_All,COG4097	CL5102.Contig2_All,COG0369	CL5189.Contig1_All,COG0474	CL5189.Contig2_All,COG0474	CL5189.Contig3_All,COG0474	CL5189.Contig4_All,COG0474	CL5318.Contig1_All,COG0155	CL5489.Contig1_All,COG2217	CL5489.Contig2_All,COG2217	CL5496.Contig1_All,COG0474	CL5496.Contig2_All,COG0474	CL5664.Contig1_All,COG0477	CL5664.Contig2_All,COG0477	CL5767.Contig1_All,COG0387	CL5767.Contig2_All,COG0387	CL5830.Contig2_All,COG0477	CL5852.Contig1_All,COG3540	CL5889.Contig1_All,COG0004	CL5889.Contig2_All,COG0004	CL5900.Contig1_All,COG0387	CL5900.Contig1_All,COG0530	CL5900.Contig2_All,COG0387	CL5900.Contig2_All,COG0530	CL5948.Contig1_All,COG0474	CL5948.Contig2_All,COG0474
Q	Secondary metabolites biosynthesis, transport and catabolism	1012	CL4446.Contig1_All,COG1463	CL4452.Contig1_All,COG2931	CL4452.Contig2_All,COG2931	CL4464.Contig1_All,COG2931	CL4464.Contig2_All,COG2931	CL4485.Contig1_All,COG0318	CL4485.Contig2_All,COG0318	CL4485.Contig3_All,COG0318	CL4485.Contig4_All,COG0318	CL4485.Contig5_All,COG0318	CL4567.Contig1_All,COG0500	CL4567.Contig2_All,COG0500	CL4591.Contig1_All,COG2931	CL4591.Contig2_All,COG2931	CL4643.Contig1_All,COG0236	CL4643.Contig2_All,COG0236	CL4643.Contig3_All,COG0236	CL4708.Contig1_All,COG2931	CL4708.Contig1_All,COG1463	CL4741.Contig1_All,COG2132	CL4741.Contig2_All,COG2132	CL4830.Contig1_All,COG0318	CL4859.Contig1_All,COG0500	CL4859.Contig2_All,COG0500	CL4895.Contig1_All,COG0318	CL4895.Contig2_All,COG0318	CL5014.Contig1_All,COG1028	CL5093.Contig1_All,COG0123	CL5098.Contig1_All,COG2931	CL5098.Contig2_All,COG2931	CL5137.Contig2_All,COG2124	CL5175.Contig1_All,COG2124	CL5261.Contig1_All,COG2931	CL5275.Contig1_All,COG2931	CL5275.Contig2_All,COG2931	CL5275.Contig3_All,COG2931	CL5290.Contig1_All,COG2931	CL5290.Contig1_All,COG1463	CL5290.Contig2_All,COG2931	CL5290.Contig2_All,COG1463	CL5316.Contig2_All,COG3424	CL5347.Contig1_All,COG2931	CL5347.Contig1_All,COG1463	CL5347.Contig2_All,COG2931	CL5347.Contig2_All,COG1463	CL5347.Contig3_All,COG2931	CL5347.Contig3_All,COG1463
R	General function prediction only	4188	CL4413.Contig1_All,COG0477	CL4445.Contig1_All,COG1052	CL4446.Contig1_All,COG2319	CL4446.Contig1_All,COG0515	CL4452.Contig1_All,COG0515	CL4452.Contig1_All,COG2319	CL4452.Contig2_All,COG0515	CL4452.Contig2_All,COG2319	CL4452.Contig2_All,COG5263	CL4464.Contig1_All,COG0724	CL4464.Contig1_All,COG2823	CL4464.Contig2_All,COG0724	CL4464.Contig2_All,COG2823	CL4470.Contig1_All,COG0724	CL4475.Contig1_All,COG1409	CL4477.Contig1_All,COG0515	CL4477.Contig2_All,COG0515	CL4477.Contig3_All,COG0515	CL4477.Contig4_All,COG0515	CL4478.Contig1_All,COG0515	CL4484.Contig1_All,COG0477	CL4515.Contig1_All,COG2319	CL4515.Contig2_All,COG2319	CL4530.Contig1_All,COG1350	CL4530.Contig2_All,COG1350	CL4531.Contig1_All,COG1409	CL4531.Contig2_All,COG1409	CL4553.Contig1_All,COG1052	CL4553.Contig2_All,COG1052	CL4556.Contig1_All,COG2159	CL4556.Contig2_All,COG2159	CL4565.Contig1_All,COG5126	CL4565.Contig2_All,COG5126	CL4567.Contig1_All,COG0500	CL4567.Contig1_All,COG1092	CL4567.Contig2_All,COG0500	CL4567.Contig2_All,COG1092	CL4574.Contig2_All,COG0515	CL4574.Contig3_All,COG0515	CL4578.Contig1_All,COG5271	CL4578.Contig3_All,COG5271	CL4578.Contig4_All,COG5271	CL4584.Contig2_All,COG0457	CL4591.Contig1_All,COG2319	CL4591.Contig1_All,COG0515	CL4591.Contig2_All,COG2319	CL4591.Contig2_All,COG0515
S	Function unknown	1537	CL4446.Contig1_All,COG1714	CL4446.Contig1_All,COG3501	CL4446.Contig1_All,COG5473	CL4452.Contig1_All,COG3501	CL4452.Contig2_All,COG3501	CL4470.Contig1_All,COG1520	CL4470.Contig2_All,COG1520	CL4523.Contig1_All,COG4886	CL4561.Contig1_All,COG5594	CL4585.Contig1_All,COG4886	CL4585.Contig2_All,COG4886	CL4591.Contig1_All,COG1714	CL4591.Contig1_All,COG4371	CL4591.Contig1_All,COG1649	CL4591.Contig2_All,COG1714	CL4591.Contig2_All,COG4371	CL4591.Contig2_All,COG1511	CL4605.Contig1_All,COG4886	CL4605.Contig2_All,COG4886	CL4693.Contig1_All,COG4886	CL4708.Contig1_All,COG3501	CL4708.Contig1_All,COG1714	CL4710.Contig1_All,COG4886	CL4745.Contig1_All,COG1297	CL4746.Contig1_All,COG4886	CL4764.Contig1_All,COG4886	CL4764.Contig2_All,COG4886	CL4768.Contig2_All,COG1714	CL4787.Contig1_All,COG2105	CL4787.Contig2_All,COG2105	CL4822.Contig1_All,COG4886	CL4822.Contig2_All,COG4886	CL4870.Contig1_All,COG4886	CL4870.Contig2_All,COG4886	CL4878.Contig1_All,COG3743	CL4878.Contig2_All,COG3743	CL4941.Contig1_All,COG1340	CL4959.Contig1_All,COG3501	CL4959.Contig2_All,COG3501	CL4967.Contig1_All,COG1990	CL4967.Contig2_All,COG1990	CL4967.Contig3_All,COG1990	CL4996.Contig1_All,COG4886	CL5020.Contig1_All,COG0398	CL5020.Contig2_All,COG0398	CL5106.Contig1_All,COG3584	CL5106.Contig2_All,COG3584
T	Signal transduction mechanisms	1674	CL4437.Contig1_All,COG5411	CL4446.Contig1_All,COG0515	CL4452.Contig1_All,COG0515	CL4452.Contig1_All,COG3456	CL4452.Contig2_All,COG0515	CL4452.Contig2_All,COG3456	CL4477.Contig1_All,COG0515	CL4477.Contig2_All,COG0515	CL4477.Contig3_All,COG0515	CL4477.Contig4_All,COG0515	CL4478.Contig1_All,COG0515	CL4487.Contig1_All,COG0317	CL4565.Contig1_All,COG5126	CL4565.Contig2_All,COG5126	CL4574.Contig2_All,COG0515	CL4574.Contig3_All,COG0515	CL4591.Contig1_All,COG0515	CL4591.Contig2_All,COG0515	CL4625.Contig1_All,COG0515	CL4625.Contig2_All,COG0515	CL4678.Contig2_All,COG0515	CL4679.Contig1_All,COG0631	CL4679.Contig2_All,COG0631	CL4708.Contig1_All,COG0515	CL4746.Contig1_All,COG0515	CL4820.Contig1_All,COG0515	CL4820.Contig2_All,COG0515	CL4850.Contig1_All,COG0515	CL4850.Contig2_All,COG0515	CL4853.Contig1_All,COG5170	CL4853.Contig2_All,COG5170	CL4855.Contig1_All,COG0515	CL4855.Contig2_All,COG0515	CL4879.Contig1_All,COG0515	CL4879.Contig2_All,COG0515	CL4922.Contig2_All,COG0515	CL4934.Contig2_All,COG0515	CL4934.Contig3_All,COG0515	CL4946.Contig1_All,COG0515	CL4946.Contig2_All,COG0515	CL4959.Contig1_All,COG0515	CL4965.Contig2_All,COG0834	CL5033.Contig1_All,COG0515	CL5033.Contig2_All,COG0515	CL5043.Contig2_All,COG0515	CL5065.Contig3_All,COG0515	CL5076.Contig1_All,COG0631
U	Intracellular trafficking, secretion, and vesicular transport	593	CL4463.Contig1_All,COG5347	CL4463.Contig2_All,COG5347	CL4481.Contig1_All,COG3468	CL4626.Contig1_All,COG5052	CL4626.Contig2_All,COG5052	CL4708.Contig1_All,COG4796	CL4721.Contig1_All,COG5196	CL4721.Contig2_All,COG5196	CL4791.Contig1_All,COG5196	CL4791.Contig2_All,COG5196	CL4796.Contig1_All,COG3468	CL4959.Contig1_All,COG4796	CL4959.Contig2_All,COG4796	CL5002.Contig1_All,COG5101	CL5002.Contig2_All,COG5101	CL5042.Contig1_All,COG5064	CL5042.Contig2_All,COG5064	CL5042.Contig3_All,COG5064	CL5122.Contig1_All,COG1705	CL5122.Contig2_All,COG1705	CL5123.Contig1_All,COG5064	CL5123.Contig2_All,COG5064	CL5149.Contig1_All,COG5391	CL5149.Contig2_All,COG5391	CL5149.Contig3_All,COG5391	CL5234.Contig1_All,COG5171	CL5235.Contig2_All,COG3468	CL5275.Contig3_All,COG5295	CL5290.Contig1_All,COG3468	CL5290.Contig1_All,COG4796	CL5290.Contig2_All,COG4796	CL5290.Contig2_All,COG3468	CL5308.Contig1_All,COG5232	CL5347.Contig1_All,COG4796	CL5347.Contig2_All,COG4796	CL5347.Contig3_All,COG4796	CL5370.Contig2_All,COG3468	CL5370.Contig2_All,COG3210	CL5370.Contig3_All,COG3468	CL5436.Contig1_All,COG5032	CL5436.Contig2_All,COG5032	CL5462.Contig1_All,COG0706	CL5462.Contig2_All,COG0706	CL5476.Contig1_All,COG0342	CL5490.Contig1_All,COG3170	CL5490.Contig2_All,COG3170	CL5490.Contig3_All,COG3170
V	Defense mechanisms	280	CL4723.Contig1_All,COG1680	CL4723.Contig2_All,COG1680	CL4723.Contig3_All,COG1680	CL4945.Contig1_All,COG1131	CL4945.Contig1_All,COG1132	CL5026.Contig1_All,COG0534	CL5026.Contig2_All,COG0534	CL5197.Contig1_All,COG1680	CL5219.Contig1_All,COG1132	CL5219.Contig2_All,COG1132	CL5673.Contig1_All,COG1401	CL6239.Contig2_All,COG1132	CL6372.Contig1_All,COG1132	Unigene52_All,COG1132	Unigene88_All,COG1131	Unigene283_All,COG1132	Unigene283_All,COG2274	Unigene576_All,COG0534	Unigene665_All,COG0534	Unigene1153_All,COG1132	Unigene1252_All,COG1132	Unigene1780_All,COG0534	Unigene2788_All,COG1132	Unigene3016_All,COG1131	Unigene3016_All,COG1136	Unigene3016_All,COG1132	Unigene3159_All,COG0534	Unigene3671_All,COG1132	Unigene3912_All,COG0534	Unigene4383_All,COG1132	Unigene4383_All,COG2274	Unigene4896_All,COG1131	Unigene5108_All,COG0534	Unigene5128_All,COG1132	Unigene5128_All,COG2274	Unigene5154_All,COG1132	Unigene5321_All,COG1403	Unigene5423_All,COG0534	Unigene5456_All,COG0842	Unigene5526_All,COG1680	Unigene5800_All,COG1401	Unigene6016_All,COG1132	Unigene6269_All,COG2720	Unigene7022_All,COG1131	Unigene7022_All,COG1136	Unigene7233_All,COG1132	Unigene7233_All,COG2274
W	Extracellular structures	12	CL5275.Contig3_All,COG5295	CL5858.Contig1_All,COG5295	Unigene388_All,COG5295	Unigene489_All,COG5295	Unigene8104_All,COG5295	CL104.Contig2_All,COG5295	Unigene11370_All,COG5295	Unigene12248_All,COG5295	Unigene12249_All,COG5295	CL2636.Contig1_All,COG5295	CL2975.Contig2_All,COG5295	CL3997.Contig2_All,COG5295
Y	Nuclear structure	3	CL5002.Contig1_All,COG5101	CL5002.Contig2_All,COG5101	Unigene22262_All,COG5101
Z	Cytoskeleton	416	CL4481.Contig1_All,COG5059	CL4481.Contig2_All,COG5059	CL4481.Contig3_All,COG5059	CL4481.Contig4_All,COG5059	CL4565.Contig1_All,COG5126	CL4565.Contig2_All,COG5126	CL4659.Contig1_All,COG5022	CL4659.Contig2_All,COG5022	CL4659.Contig3_All,COG5022	CL4941.Contig1_All,COG5022	CL4962.Contig1_All,COG5022	CL5235.Contig2_All,COG5022	CL5265.Contig1_All,COG5126	CL5265.Contig2_All,COG5126	CL5278.Contig1_All,COG5023	CL5278.Contig2_All,COG5023	CL5278.Contig3_All,COG5023	CL5370.Contig2_All,COG5022	CL5370.Contig3_All,COG5022	CL5406.Contig1_All,COG5126	CL5616.Contig2_All,COG5022	CL5634.Contig2_All,COG5022	CL5634.Contig3_All,COG5022	CL5641.Contig1_All,COG5126	CL5641.Contig2_All,COG5126	CL5801.Contig1_All,COG5059	CL5801.Contig2_All,COG5059	CL5875.Contig1_All,COG5277	CL5875.Contig2_All,COG5277	CL5875.Contig3_All,COG5277	CL5947.Contig1_All,COG5022	CL5947.Contig2_All,COG5022	CL5947.Contig3_All,COG5022	CL6134.Contig1_All,COG5126	CL6134.Contig2_All,COG5126	CL6181.Contig1_All,COG5059	CL6240.Contig1_All,COG5277	CL6240.Contig2_All,COG5277	CL6240.Contig3_All,COG5277	CL6240.Contig4_All,COG5277	CL6240.Contig5_All,COG5277	CL6240.Contig6_All,COG5277	CL6240.Contig7_All,COG5277	CL6283.Contig1_All,COG5023	CL6404.Contig1_All,COG5277	CL6404.Contig2_All,COG5277	CL6439.Contig1_All,COG5126
[truncated: 206 more columns]

## Sheet: Table S2 
Table S2. Gene ontology (GO) analyses of L. olgensis transcriptome data.
Ontology	Class	number_of_All-Unigene	genes_of_All-Unigene
biological_process	biological adhesion	129	Unigene383_All;CL3073.Contig2_All;Unigene1683_All;Unigene23932_All;Unigene3205_All;CL1418.Contig1_All;CL1418.Contig2_All;CL1418.Contig3_All;Unigene13061_All;Unigene25414_All;Unigene30178_All;Unigene3500_All;CL1285.Contig2_All;CL1462.Contig2_All;CL1562.Contig2_All;CL1592.Contig6_All;CL1628.Contig1_All;CL1628.Contig2_All;CL1735.Contig1_All;CL1896.Contig1_All;CL1896.Contig2_All;CL1896.Contig3_All;CL…
biological_process	biological regulation	5062	CL1990.Contig3_All;CL2825.Contig1_All;CL2825.Contig2_All;CL2825.Contig3_All;CL2825.Contig4_All;CL3182.Contig1_All;CL3182.Contig2_All;CL3182.Contig3_All;CL81.Contig2_All;CL81.Contig4_All;Unigene33269_All;Unigene33666_All;Unigene7150_All;CL3275.Contig1_All;CL3275.Contig2_All;Unigene10472_All;CL3721.Contig1_All;Unigene16456_All;Unigene1674_All;Unigene17123_All;Unigene4223_All;Unigene4302_All;Unigene…
2617_All;Unigene33007_All;Unigene7079_All;Unigene9993_All;CL1087.Contig1_All;CL1087.Contig2_All;CL1334.Contig1_All;CL1334.Contig2_All;CL1342.Contig1_All;CL2694.Contig2_All;CL2694.Contig3_All;CL3047.Contig1_All;CL3047.Contig2_All;CL3047.Contig3_All;CL315.Contig1_All;CL4325.Contig1_All;CL4325.Contig2_All;CL4325.Contig3_All;CL4325.Contig4_All;CL4713.Contig1_All;CL4713.Contig2_All;CL5060.Contig2_All;…
l;Unigene220_All;Unigene22744_All;CL1146.Contig1_All;CL1146.Contig3_All;CL1335.Contig1_All;CL1335.Contig2_All;CL1335.Contig4_All;CL1335.Contig7_All;CL1335.Contig8_All;CL1335.Contig9_All;CL236.Contig1_All;CL236.Contig2_All;CL2926.Contig1_All;CL3362.Contig2_All;CL4373.Contig1_All;CL594.Contig1_All;CL594.Contig2_All;CL6239.Contig2_All;CL739.Contig1_All;CL739.Contig3_All;Unigene11770_All;Unigene1252_…
biological_process	cell killing	2	Unigene13053_All;Unigene24465_All
biological_process	cellular component organization or biogenesis	3858	CL3721.Contig1_All;Unigene16456_All;Unigene1674_All;Unigene17123_All;Unigene4223_All;Unigene4302_All;CL2694.Contig2_All;CL2694.Contig3_All;CL3726.Contig1_All;CL4683.Contig1_All;CL4683.Contig2_All;CL6108.Contig1_All;CL6108.Contig2_All;Unigene10569_All;Unigene14925_All;Unigene15619_All;Unigene17666_All;Unigene19054_All;Unigene20383_All;Unigene21840_All;Unigene22877_All;Unigene23190_All;Unigene4189_…
6099_All;Unigene16191_All;Unigene16487_All;Unigene16668_All;Unigene1691_All;Unigene18002_All;Unigene1809_All;Unigene18795_All;Unigene1901_All;Unigene19567_All;Unigene2078_All;Unigene21385_All;Unigene21544_All;Unigene21856_All;Unigene21988_All;Unigene22407_All;Unigene23471_All;Unigene2625_All;Unigene28582_All;Unigene2912_All;Unigene3301_All;Unigene35002_All;Unigene4329_All;Unigene4613_All;Unigene5…
79.Contig9_All;CL1630.Contig1_All;CL3495.Contig1_All;CL3495.Contig2_All;CL3618.Contig1_All;CL3618.Contig2_All;CL5138.Contig1_All;CL5138.Contig2_All;CL5278.Contig1_All;CL5278.Contig2_All;CL5278.Contig3_All;CL6283.Contig1_All;Unigene10368_All;Unigene11905_All;Unigene12412_All;Unigene12981_All;Unigene15116_All;Unigene16849_All;Unigene1729_All;Unigene1737_All;Unigene19340_All;Unigene21622_All;Unigene…
biological_process	cellular process	13668	CL3721.Contig1_All;Unigene16456_All;Unigene1674_All;Unigene17123_All;Unigene4223_All;Unigene4302_All;CL2489.Contig1_All;CL2489.Contig2_All;CL2604.Contig1_All;CL2604.Contig2_All;CL4440.Contig1_All;CL4440.Contig2_All;CL4440.Contig3_All;CL5922.Contig1_All;CL5922.Contig2_All;CL61.Contig1_All;CL61.Contig2_All;CL865.Contig1_All;CL865.Contig2_All;Unigene13835_All;Unigene14445_All;Unigene14797_All;Unigen…
ene19493_All;Unigene19658_All;Unigene19687_All;Unigene19720_All;Unigene19747_All;Unigene19905_All;Unigene19913_All;Unigene20141_All;Unigene20270_All;Unigene20346_All;Unigene20410_All;Unigene20769_All;Unigene20805_All;Unigene20937_All;Unigene20999_All;Unigene21079_All;Unigene21135_All;Unigene21166_All;Unigene21344_All;Unigene21529_All;Unigene2153_All;Unigene21549_All;Unigene21732_All;Unigene2173_A…
Contig2_All;CL5884.Contig3_All;CL6171.Contig1_All;CL714.Contig2_All;Unigene10026_All;Unigene10092_All;Unigene11698_All;Unigene13205_All;Unigene13249_All;Unigene14001_All;Unigene14265_All;Unigene1622_All;Unigene17102_All;Unigene17343_All;Unigene17857_All;Unigene19669_All;Unigene19742_All;Unigene20438_All;Unigene20450_All;Unigene20819_All;Unigene21074_All;Unigene22038_All;Unigene22090_All;Unigene22…
tig2_All;Unigene11042_All;Unigene11240_All;Unigene11522_All;Unigene15043_All;Unigene15064_All;Unigene20265_All;Unigene24130_All;Unigene24670_All;Unigene31377_All;Unigene4902_All;Unigene5554_All;Unigene8091_All;Unigene8301_All;Unigene8661_All;Unigene9050_All;CL1749.Contig1_All;CL1749.Contig2_All;CL1749.Contig3_All;CL2402.Contig1_All;CL2402.Contig2_All;CL3623.Contig2_All;CL444.Contig2_All;CL5216.Co…
gene21634_All;Unigene22996_All;Unigene23848_All;Unigene27745_All;Unigene30083_All;Unigene3338_All;Unigene33480_All;Unigene34299_All;Unigene4180_All;Unigene7894_All;Unigene16185_All;Unigene19282_All;Unigene6802_All;Unigene21032_All;Unigene10013_All;Unigene22401_All;Unigene3472_All;CL1892.Contig6_All;CL1892.Contig8_All;CL6032.Contig1_All;CL6032.Contig2_All;CL6032.Contig3_All;Unigene10593_All;Unigen…
.Contig1_All;CL382.Contig2_All;CL4137.Contig1_All;CL4137.Contig2_All;CL4314.Contig1_All;CL442.Contig1_All;CL442.Contig2_All;CL4617.Contig1_All;CL4617.Contig2_All;CL4617.Contig3_All;CL4997.Contig1_All;CL4997.Contig2_All;Unigene10126_All;Unigene1076_All;Unigene11406_All;Unigene11529_All;Unigene13865_All;Unigene13997_All;Unigene15184_All;Unigene15289_All;Unigene16169_All;Unigene16258_All;Unigene1632…
;Unigene1780_All;Unigene20216_All;Unigene21862_All;Unigene24615_All;Unigene25500_All;Unigene25781_All;Unigene29617_All;Unigene30614_All;Unigene3159_All;Unigene32173_All;Unigene32418_All;Unigene32814_All;Unigene33812_All;Unigene5108_All;Unigene576_All;Unigene665_All;Unigene8020_All;Unigene11511_All;Unigene18745_All;Unigene1897_All;Unigene2007_All;Unigene22513_All;Unigene25198_All;Unigene27510_All;…
tig1_All;CL4009.Contig2_All;CL4286.Contig1_All;CL4286.Contig2_All;CL4682.Contig1_All;CL4682.Contig3_All;CL4682.Contig4_All;CL4682.Contig6_All;CL4682.Contig7_All;CL941.Contig3_All;CL941.Contig4_All;Unigene10178_All;Unigene10910_All;Unigene11468_All;Unigene13005_All;Unigene13666_All;Unigene13868_All;Unigene14725_All;Unigene1492_All;Unigene14976_All;Unigene18593_All;Unigene18874_All;Unigene20637_All…
biological_process	developmental process	4005	CL3275.Contig1_All;CL3275.Contig2_All;Unigene10472_All;CL1329.Contig1_All;CL1329.Contig2_All;CL1329.Contig3_All;CL4249.Contig4_All;CL517.Contig1_All;Unigene12289_All;Unigene1796_All;Unigene1799_All;Unigene20762_All;Unigene2123_All;Unigene21648_All;Unigene22275_All;Unigene2852_All;Unigene4957_All;Unigene9639_All;CL1914.Contig2_All;CL4422.Contig2_All;CL4892.Contig1_All;Unigene183_All;Unigene23884_A…
4_All;Unigene9922_All;CL2420.Contig2_All;CL2420.Contig3_All;CL2420.Contig4_All;CL2816.Contig1_All;CL2816.Contig2_All;CL2816.Contig3_All;CL4688.Contig1_All;CL4688.Contig2_All;CL4850.Contig1_All;CL4850.Contig2_All;CL5200.Contig1_All;CL5200.Contig2_All;CL6357.Contig1_All;CL6357.Contig2_All;CL6357.Contig3_All;Unigene12404_All;Unigene16101_All;Unigene21_All;Unigene22_All;Unigene344_All;Unigene4359_All…
All;Unigene20927_All;Unigene24196_All;Unigene24338_All;Unigene30335_All;Unigene33458_All;Unigene3953_All;Unigene4011_All;Unigene52_All;Unigene7464_All;Unigene7465_All;Unigene7676_All;Unigene9063_All;Unigene9783_All;CL1467.Contig3_All;CL2114.Contig1_All;CL2114.Contig2_All;CL2114.Contig3_All;CL3042.Contig1_All;CL3042.Contig2_All;CL4573.Contig1_All;CL4573.Contig2_All;CL482.Contig1_All;CL482.Contig2_…
biological_process	establishment of localization	3579	CL1114.Contig1_All;CL1294.Contig2_All;CL1315.Contig1_All;CL1315.Contig2_All;CL142.Contig1_All;CL142.Contig2_All;CL1585.Contig1_All;CL1585.Contig2_All;CL1585.Contig3_All;CL1596.Contig2_All;CL1875.Contig5_All;CL2020.Contig3_All;CL2031.Contig2_All;CL21.Contig2_All;CL2138.Contig6_All;CL2175.Contig1_All;CL2263.Contig2_All;CL2263.Contig3_All;CL2347.Contig6_All;CL255.Contig1_All;CL255.Contig2_All;CL2623…
3.Contig2_All;CL3050.Contig1_All;CL3050.Contig2_All;CL3134.Contig1_All;CL3392.Contig2_All;CL3485.Contig1_All;CL3485.Contig2_All;CL3485.Contig3_All;CL3544.Contig1_All;CL3544.Contig2_All;CL3632.Contig2_All;CL3632.Contig3_All;CL3632.Contig4_All;CL3686.Contig1_All;CL3928.Contig1_All;CL3928.Contig2_All;CL4109.Contig2_All;CL4234.Contig1_All;CL4703.Contig1_All;CL4703.Contig2_All;CL4703.Contig3_All;CL514…
biological_process	growth	880	Unigene18872_All;CL1444.Contig1_All;CL1444.Contig3_All;Unigene19330_All;Unigene21039_All;Unigene21612_All;Unigene32674_All;Unigene17140_All;Unigene20241_All;Unigene20762_All;Unigene14286_All;CL3540.Contig1_All;CL3540.Contig2_All;Unigene12310_All;CL1002.Contig1_All;CL1294.Contig1_All;CL1294.Contig3_All;CL1823.Contig2_All;CL2065.Contig2_All;CL2663.Contig1_All;CL2663.Contig2_All;CL3156.Contig1_All;C…
biological_process	immune system process	791	CL1445.Contig2_All;CL1599.Contig1_All;CL1599.Contig2_All;CL1599.Contig4_All;CL1599.Contig5_All;CL2947.Contig1_All;CL5041.Contig1_All;CL5041.Contig2_All;CL5041.Contig3_All;CL5292.Contig1_All;CL5534.Contig1_All;CL5570.Contig1_All;Unigene12478_All;Unigene13355_All;Unigene13753_All;Unigene14841_All;Unigene14871_All;Unigene16785_All;Unigene17411_All;Unigene18611_All;Unigene19795_All;Unigene2035_All;Un…
biological_process	localization	3746	CL1114.Contig1_All;CL1294.Contig2_All;CL1315.Contig1_All;CL1315.Contig2_All;CL142.Contig1_All;CL142.Contig2_All;CL1585.Contig1_All;CL1585.Contig2_All;CL1585.Contig3_All;CL1596.Contig2_All;CL1875.Contig5_All;CL2020.Contig3_All;CL2031.Contig2_All;CL21.Contig2_All;CL2138.Contig6_All;CL2175.Contig1_All;CL2263.Contig2_All;CL2263.Contig3_All;CL2347.Contig6_All;CL255.Contig1_All;CL255.Contig2_All;CL2623…
nigene4134_All;Unigene4408_All;Unigene4480_All;Unigene767_All;Unigene7787_All;Unigene8189_All;Unigene948_All;CL2545.Contig1_All;CL2545.Contig2_All;CL3021.Contig1_All;CL3021.Contig2_All;Unigene218_All;CL105.Contig1_All;CL105.Contig2_All;CL105.Contig3_All;CL105.Contig4_All;CL297.Contig1_All;CL297.Contig2_All;CL4187.Contig3_All;CL4284.Contig1_All;CL4284.Contig2_All;CL4334.Contig1_All;CL4565.Contig1_…
;Unigene32158_All;Unigene3267_All;Unigene32722_All;Unigene32930_All;Unigene33015_All;Unigene33207_All;Unigene33470_All;Unigene33479_All;Unigene34429_All;Unigene34515_All;Unigene34585_All;Unigene34899_All;Unigene34938_All;Unigene3544_All;Unigene3774_All;Unigene4285_All;Unigene452_All;Unigene4727_All;Unigene4802_All;Unigene4806_All;Unigene5122_All;Unigene5154_All;Unigene5285_All;Unigene5882_All;Uni…
biological_process	locomotion	22	CL4181.Contig1_All;CL4181.Contig2_All;CL694.Contig1_All;Unigene19705_All;CL1209.Contig3_All;CL1209.Contig4_All;CL4570.Contig1_All;CL4570.Contig2_All;CL5220.Contig1_All;CL5220.Contig2_All;CL5220.Contig3_All;Unigene10172_All;Unigene13244_All;Unigene16843_All;Unigene18660_All;Unigene19243_All;Unigene19655_All;Unigene22170_All;Unigene24981_All;Unigene3205_All;Unigene523_All;Unigene5877_All
biological_process	metabolic process	13334	CL2489.Contig1_All;CL2489.Contig2_All;CL2604.Contig1_All;CL2604.Contig2_All;CL4440.Contig1_All;CL4440.Contig2_All;CL4440.Contig3_All;CL5922.Contig1_All;CL5922.Contig2_All;CL61.Contig1_All;CL61.Contig2_All;CL865.Contig1_All;CL865.Contig2_All;Unigene13835_All;Unigene14445_All;Unigene14797_All;Unigene17089_All;Unigene17426_All;Unigene17960_All;Unigene2095_All;Unigene2144_All;Unigene34510_All;Unigene…
ll;Unigene4073_All;Unigene416_All;Unigene4471_All;Unigene4556_All;Unigene4612_All;Unigene4744_All;Unigene4817_All;Unigene4865_All;Unigene4866_All;Unigene4867_All;Unigene4869_All;Unigene4872_All;Unigene4874_All;Unigene4875_All;Unigene4876_All;Unigene4877_All;Unigene4878_All;Unigene4879_All;Unigene4880_All;Unigene4882_All;Unigene4883_All;Unigene491_All;Unigene4957_All;Unigene4993_All;Unigene5042_Al…
tig2_All;CL4628.Contig1_All;CL4628.Contig2_All;CL4648.Contig1_All;CL4670.Contig3_All;CL4731.Contig1_All;CL4770.Contig2_All;CL482.Contig1_All;CL482.Contig2_All;CL4921.Contig1_All;CL5037.Contig2_All;CL5110.Contig1_All;CL5110.Contig2_All;CL521.Contig1_All;CL521.Contig3_All;CL521.Contig7_All;CL521.Contig9_All;CL5210.Contig1_All;CL5210.Contig2_All;CL5213.Contig2_All;CL5266.Contig2_All;CL5266.Contig3_A…
ll;Unigene6726_All;Unigene7491_All;Unigene7833_All;Unigene8927_All;Unigene900_All;Unigene27350_All;Unigene31932_All;Unigene6707_All;CL3346.Contig1_All;CL3346.Contig2_All;CL6428.Contig1_All;CL6428.Contig2_All;Unigene11395_All;Unigene21763_All;Unigene21764_All;Unigene12311_All;Unigene21927_All;Unigene22307_All;Unigene22424_All;Unigene23510_All;Unigene23631_All;Unigene3212_All;Unigene33633_All;Unige…
ene21508_All;Unigene2168_All;Unigene24075_All;Unigene24208_All;Unigene24339_All;Unigene24548_All;Unigene24549_All;Unigene26670_All;Unigene26808_All;Unigene29009_All;Unigene30984_All;Unigene31201_All;Unigene31356_All;Unigene31828_All;Unigene31829_All;Unigene768_All;Unigene8525_All;Unigene9611_All;CL2083.Contig3_All;CL2913.Contig3_All;CL2913.Contig4_All;CL297.Contig1_All;CL297.Contig2_All;CL4187.Co…
Unigene459_All;Unigene8045_All;Unigene8931_All;Unigene4152_All;Unigene29666_All;CL1079.Contig1_All;CL1079.Contig2_All;Unigene11440_All;Unigene12599_All;Unigene23663_All;Unigene24121_All;Unigene30275_All;Unigene9613_All;Unigene9815_All;CL6175.Contig1_All;Unigene28574_All;Unigene3528_All;Unigene14590_All;Unigene14762_All;Unigene18014_All;Unigene4110_All;Unigene27132_All;Unigene33242_All;Unigene3475…
g3_All;CL4033.Contig4_All;CL553.Contig2_All;CL6120.Contig1_All;CL6120.Contig2_All;Unigene10299_All;Unigene10446_All;Unigene10509_All;Unigene11421_All;Unigene11645_All;Unigene12577_All;Unigene13889_All;Unigene14053_All;Unigene14749_All;Unigene168_All;Unigene17045_All;Unigene17104_All;Unigene18199_All;Unigene192_All;Unigene19508_All;Unigene21222_All;Unigene21239_All;Unigene22006_All;Unigene23318_Al…
ll;CL2763.Contig1_All;CL3286.Contig1_All;CL3296.Contig1_All;CL413.Contig2_All;CL413.Contig5_All;CL4643.Contig1_All;CL4643.Contig2_All;CL4643.Contig3_All;CL5111.Contig1_All;CL5111.Contig3_All;CL5316.Contig2_All;CL6052.Contig2_All;Unigene11561_All;Unigene12485_All;Unigene16514_All;Unigene19135_All;Unigene22842_All;Unigene2326_All;Unigene2440_All;Unigene26717_All;Unigene27_All;Unigene32352_All;Unige…
biological_process	multi-organism process	1703	Unigene29718_All;CL1445.Contig2_All;CL1599.Contig1_All;CL1599.Contig2_All;CL1599.Contig4_All;CL1599.Contig5_All;CL2947.Contig1_All;CL5041.Contig1_All;CL5041.Contig2_All;CL5041.Contig3_All;CL5292.Contig1_All;CL5534.Contig1_All;CL5570.Contig1_All;Unigene12478_All;Unigene13355_All;Unigene13753_All;Unigene14841_All;Unigene14871_All;Unigene16785_All;Unigene17411_All;Unigene18611_All;Unigene19795_All;U…
biological_process	multicellular organismal process	3936	CL3275.Contig1_All;CL3275.Contig2_All;Unigene10472_All;CL1329.Contig1_All;CL1329.Contig2_All;CL1329.Contig3_All;CL4249.Contig4_All;CL517.Contig1_All;Unigene12289_All;Unigene1796_All;Unigene1799_All;Unigene20762_All;Unigene2123_All;Unigene21648_All;Unigene22275_All;Unigene2852_All;Unigene4957_All;Unigene9639_All;CL1914.Contig2_All;CL4422.Contig2_All;CL4892.Contig1_All;Unigene183_All;Unigene23884_A…
ene6056_All;Unigene6399_All;Unigene6561_All;Unigene6792_All;Unigene6959_All;Unigene7033_All;Unigene73_All;Unigene7475_All;Unigene7577_All;Unigene7688_All;Unigene7820_All;Unigene7922_All;Unigene7941_All;Unigene85_All;Unigene9061_All;Unigene9246_All;Unigene9319_All;Unigene9844_All;CL1146.Contig1_All;CL1146.Contig3_All;CL1984.Contig1_All;CL1984.Contig2_All;CL1984.Contig3_All;CL236.Contig1_All;CL236.…
L2415.Contig3_All;CL2415.Contig4_All;CL2415.Contig5_All;Unigene15487_All;Unigene4405_All;Unigene5214_All;Unigene10168_All;CL1914.Contig4_All;CL1914.Contig5_All;CL1914.Contig6_All;CL2687.Contig2_All;CL2761.Contig1_All;CL3296.Contig2_All;CL3296.Contig3_All;CL3433.Contig1_All;CL3433.Contig2_All;CL3433.Contig3_All;CL5609.Contig2_All;CL682.Contig4_All;Unigene12537_All;Unigene14542_All;Unigene16514_All…
biological_process	negative regulation of biological process	1090	CL6323.Contig1_All;Unigene1692_All;Unigene23492_All;Unigene2365_All;Unigene2544_All;Unigene2762_All;Unigene9875_All;CL1228.Contig2_All;CL1342.Contig3_All;CL1916.Contig2_All;CL2327.Contig1_All;CL2327.Contig2_All;CL2703.Contig1_All;CL2910.Contig1_All;CL2910.Contig2_All;CL3090.Contig1_All;CL3090.Contig2_All;CL3157.Contig1_All;CL3157.Contig2_All;CL5160.Contig2_All;Unigene11824_All;Unigene11973_All;Un…
biological_process	positive regulation of biological process	1026	CL3721.Contig1_All;Unigene16456_All;Unigene1674_All;Unigene17123_All;Unigene4223_All;Unigene4302_All;CL3505.Contig1_All;CL3505.Contig2_All;Unigene29718_All;CL3275.Contig1_All;CL3275.Contig2_All;Unigene5805_All;CL2420.Contig2_All;CL2420.Contig3_All;CL2420.Contig4_All;CL2816.Contig1_All;CL2816.Contig2_All;CL2816.Contig3_All;CL4850.Contig2_All;CL5200.Contig1_All;CL5200.Contig2_All;CL6357.Contig1_All…
biological_process	regulation of biological process	4591	CL3275.Contig1_All;CL3275.Contig2_All;Unigene10472_All;CL3721.Contig1_All;Unigene16456_All;Unigene1674_All;Unigene17123_All;Unigene4223_All;Unigene4302_All;Unigene14627_All;Unigene2473_All;Unigene2672_All;Unigene4169_All;CL3505.Contig1_All;CL3505.Contig2_All;Unigene29718_All;CL1585.Contig1_All;CL1585.Contig2_All;CL1585.Contig3_All;CL3072.Contig2_All;CL3072.Contig3_All;CL3072.Contig4_All;CL3927.Co…
e16639_All;Unigene16686_All;Unigene16753_All;Unigene17526_All;Unigene17982_All;Unigene17988_All;Unigene18005_All;Unigene18101_All;Unigene18122_All;Unigene181_All;Unigene19372_All;Unigene19802_All;Unigene2035_All;Unigene20383_All;Unigene20592_All;Unigene21986_All;Unigene22074_All;Unigene22877_All;Unigene23069_All;Unigene23103_All;Unigene23190_All;Unigene23639_All;Unigene25111_All;Unigene25818_All;…
tig2_All;CL4718.Contig2_All;Unigene11312_All;Unigene12721_All;Unigene13906_All;Unigene14646_All;Unigene1677_All;Unigene17590_All;Unigene17631_All;Unigene20042_All;Unigene263_All;Unigene30845_All;Unigene5051_All;Unigene6462_All;Unigene6599_All;Unigene6695_All;CL2742.Contig1_All;CL2742.Contig2_All;CL2742.Contig3_All;CL4721.Contig1_All;CL4721.Contig2_All;CL4791.Contig1_All;CL4791.Contig2_All;Unigene…
biological_process	reproduction	2417	CL3275.Contig1_All;CL3275.Contig2_All;Unigene10472_All;CL1329.Contig1_All;CL1329.Contig2_All;CL1329.Contig3_All;CL4249.Contig4_All;CL517.Contig1_All;Unigene12289_All;Unigene1796_All;Unigene1799_All;Unigene20762_All;Unigene2123_All;Unigene21648_All;Unigene22275_All;Unigene2852_All;Unigene4957_All;Unigene9639_All;Unigene12397_All;Unigene12522_All;Unigene30859_All;Unigene5020_All;CL1318.Contig1_All;…
.Contig3_All;CL5321.Contig4_All;CL609.Contig1_All;CL609.Contig2_All;CL6284.Contig1_All;CL6284.Contig2_All;Unigene1202_All;Unigene14096_All;Unigene14378_All;Unigene16154_All;Unigene16387_All;Unigene16738_All;Unigene20819_All;Unigene21164_All;Unigene22450_All;Unigene2426_All;Unigene24887_All;Unigene30862_All;Unigene32642_All;Unigene4292_All;Unigene4902_All;Unigene5231_All;Unigene7575_All;Unigene803…
biological_process	reproductive process	2260	CL3275.Contig1_All;CL3275.Contig2_All;Unigene10472_All;CL1329.Contig1_All;CL1329.Contig2_All;CL1329.Contig3_All;CL4249.Contig4_All;CL517.Contig1_All;Unigene12289_All;Unigene1796_All;Unigene1799_All;Unigene20762_All;Unigene2123_All;Unigene21648_All;Unigene22275_All;Unigene2852_All;Unigene4957_All;Unigene9639_All;Unigene12397_All;Unigene12522_All;Unigene30859_All;Unigene5020_All;CL1318.Contig1_All;…
7_All;Unigene2805_All;Unigene294_All;Unigene30450_All;Unigene3161_All;Unigene3265_All;Unigene32826_All;Unigene32832_All;Unigene32877_All;Unigene33998_All;Unigene34729_All;Unigene3757_All;Unigene4110_All;Unigene4564_All;Unigene5121_All;Unigene5411_All;Unigene6593_All;Unigene6720_All;Unigene7681_All;CL1396.Contig1_All;CL1396.Contig2_All;CL1396.Contig3_All;CL1396.Contig4_All;CL1396.Contig5_All;CL139…
biological_process	response to stimulus	6854	CL3275.Contig1_All;CL3275.Contig2_All;Unigene10472_All;CL1075.Contig1_All;CL1899.Contig1_All;CL1899.Contig2_All;CL2155.Contig1_All;CL2155.Contig2_All;CL2672.Contig1_All;CL3497.Contig1_All;CL3497.Contig2_All;CL3649.Contig1_All;CL3649.Contig2_All;CL5543.Contig1_All;CL5543.Contig2_All;CL5902.Contig1_All;CL5992.Contig1_All;CL5992.Contig2_All;CL6148.Contig2_All;CL6236.Contig1_All;CL6236.Contig2_All;CL…
Contig5_All;CL3474.Contig1_All;CL3510.Contig2_All;CL3510.Contig3_All;CL3510.Contig4_All;CL3681.Contig2_All;CL3702.Contig3_All;CL3702.Contig5_All;CL3702.Contig7_All;CL3873.Contig1_All;CL3873.Contig2_All;CL4072.Contig3_All;CL4072.Contig4_All;CL4129.Contig2_All;CL4140.Contig3_All;CL4140.Contig5_All;CL4173.Contig1_All;CL4191.Contig2_All;CL4249.Contig1_All;CL4260.Contig2_All;CL4260.Contig4_All;CL4356.…
_All;Unigene12787_All;CL1924.Contig2_All;CL3586.Contig1_All;CL372.Contig1_All;CL372.Contig2_All;CL4783.Contig1_All;CL6065.Contig2_All;Unigene11350_All;Unigene12017_All;Unigene12877_All;Unigene13747_All;Unigene15194_All;Unigene2020_All;Unigene24249_All;Unigene26832_All;Unigene28680_All;Unigene342_All;Unigene34770_All;Unigene3757_All;Unigene439_All;Unigene4812_All;Unigene9149_All;Unigene19430_All;C…
_All;Unigene16941_All;Unigene17348_All;Unigene1845_All;Unigene18470_All;Unigene19253_All;Unigene19970_All;Unigene20370_All;Unigene20597_All;Unigene22491_All;Unigene22808_All;Unigene23305_All;Unigene2374_All;Unigene24058_All;Unigene2503_All;Unigene26114_All;Unigene26224_All;Unigene27878_All;Unigene28331_All;Unigene28658_All;Unigene28893_All;Unigene29697_All;Unigene30083_All;Unigene31003_All;Unigen…
biological_process	rhythmic process	121	CL1134.Contig1_All;CL1662.Contig3_All;CL1671.Contig2_All;CL2689.Contig1_All;CL2689.Contig2_All;CL2818.Contig1_All;CL2818.Contig2_All;CL3348.Contig1_All;CL3348.Contig3_All;CL3348.Contig4_All;CL3627.Contig1_All;CL3778.Contig1_All;CL4075.Contig1_All;CL4075.Contig2_All;CL4678.Contig1_All;CL4946.Contig2_All;CL5303.Contig1_All;CL5483.Contig1_All;CL5483.Contig2_All;CL566.Contig1_All;CL966.Contig2_All;Un…
biological_process	signaling	1805	CL1114.Contig1_All;CL255.Contig1_All;CL255.Contig2_All;Unigene18082_All;CL1251.Contig2_All;CL1251.Contig4_All;CL1251.Contig5_All;CL1251.Contig6_All;CL1252.Contig2_All;CL1294.Contig2_All;CL1410.Contig1_All;CL1410.Contig2_All;CL1410.Contig3_All;CL1410.Contig4_All;CL1467.Contig1_All;CL1579.Contig2_All;CL1758.Contig3_All;CL1892.Contig1_All;CL1892.Contig2_All;CL1892.Contig4_All;CL1892.Contig5_All;CL18…
biological_process	single-organism process	9385	CL3275.Contig1_All;CL3275.Contig2_All;Unigene10472_All;CL3721.Contig1_All;Unigene16456_All;Unigene1674_All;Unigene17123_All;Unigene4223_All;Unigene4302_All;CL1114.Contig1_All;CL1294.Contig2_All;CL1315.Contig1_All;CL1315.Contig2_All;CL142.Contig1_All;CL142.Contig2_All;CL1585.Contig1_All;CL1585.Contig2_All;CL1585.Contig3_All;CL1596.Contig2_All;CL1875.Contig5_All;CL2020.Contig3_All;CL2031.Contig2_Al…
ne33845_All;Unigene34141_All;Unigene34820_All;Unigene3906_All;Unigene5020_All;Unigene541_All;Unigene5612_All;Unigene5655_All;Unigene6269_All;Unigene6500_All;Unigene6911_All;Unigene7131_All;Unigene7324_All;Unigene7630_All;Unigene8607_All;Unigene9341_All;Unigene9529_All;Unigene99_All;CL5255.Contig1_All;CL5255.Contig2_All;Unigene12272_All;Unigene15510_All;Unigene8063_All;CL1628.Contig1_All;CL1628.Co…
ll;Unigene7890_All;Unigene8406_All;Unigene9147_All;Unigene9149_All;CL531.Contig3_All;Unigene11467_All;Unigene21133_All;CL106.Contig1_All;CL106.Contig2_All;CL1216.Contig3_All;CL2574.Contig1_All;CL2574.Contig2_All;CL2574.Contig3_All;CL2574.Contig4_All;CL411.Contig2_All;CL414.Contig2_All;CL414.Contig3_All;CL4972.Contig1_All;CL5321.Contig2_All;CL5321.Contig3_All;CL5321.Contig4_All;Unigene11042_All;Un…
ne23711_All;Unigene2614_All;Unigene26426_All;Unigene30399_All;Unigene3464_All;Unigene12253_All;Unigene14308_All;Unigene16375_All;Unigene16976_All;Unigene26778_All;Unigene4420_All;Unigene5115_All;CL2104.Contig1_All;CL744.Contig1_All;CL744.Contig2_All;CL744.Contig3_All;CL744.Contig4_All;Unigene21853_All;CL1874.Contig1_All;CL1874.Contig4_All;CL1874.Contig5_All;Unigene17275_All;CL1169.Contig1_All;CL1…
ne6822_All;Unigene7409_All;Unigene9924_All;CL1002.Contig2_All;CL2436.Contig1_All;CL2436.Contig2_All;CL2436.Contig3_All;CL2436.Contig4_All;CL3133.Contig1_All;CL3133.Contig2_All;CL3133.Contig3_All;CL3133.Contig4_All;CL5434.Contig1_All;Unigene13243_All;Unigene14137_All;Unigene205_All;Unigene21474_All;Unigene24046_All;Unigene25051_All;Unigene27724_All;Unigene32111_All;Unigene4690_All;Unigene6816_All;…
_All;CL4664.Contig2_All;CL5578.Contig1_All;CL5578.Contig2_All;CL5601.Contig1_All;CL5601.Contig2_All;CL5918.Contig4_All;CL5967.Contig1_All;Unigene1220_All;Unigene12785_All;Unigene14678_All;Unigene16357_All;Unigene18090_All;Unigene18604_All;Unigene19553_All;Unigene24621_All;Unigene25418_All;Unigene25826_All;Unigene4811_All;Unigene8317_All;Unigene13027_All;Unigene7683_All;Unigene11906_All;Unigene975…
cellular_component	cell	16067	Unigene8007_All;CL1589.Contig1_All;CL17.Contig1_All;CL17.Contig2_All;CL17.Contig3_All;CL170.Contig1_All;CL170.Contig2_All;CL1708.Contig1_All;CL2222.Contig1_All;CL2222.Contig2_All;CL2222.Contig3_All;CL2223.Contig2_All;CL2285.Contig4_All;CL2538.Contig2_All;CL3099.Contig2_All;CL3518.Contig2_All;CL3518.Contig3_All;CL3814.Contig2_All;CL4303.Contig2_All;CL4885.Contig2_All;CL5199.Contig1_All;CL5199.Cont…
Unigene2671_All;Unigene2683_All;Unigene26866_All;Unigene26893_All;Unigene268_All;Unigene26929_All;Unigene2694_All;Unigene27041_All;Unigene27049_All;Unigene2714_All;Unigene27307_All;Unigene27350_All;Unigene27376_All;Unigene2737_All;Unigene27468_All;Unigene27497_All;Unigene27691_All;Unigene2789_All;Unigene28031_All;Unigene28042_All;Unigene2808_All;Unigene2813_All;Unigene28147_All;Unigene2825_All;Un…
_All;CL1145.Contig3_All;CL1157.Contig1_All;CL1157.Contig2_All;CL1179.Contig15_All;CL1179.Contig2_All;CL1188.Contig3_All;CL1192.Contig1_All;CL1192.Contig2_All;CL1205.Contig1_All;CL1205.Contig2_All;CL1208.Contig1_All;CL1208.Contig2_All;CL1251.Contig2_All;CL1251.Contig5_All;CL127.Contig1_All;CL127.Contig2_All;CL1271.Contig1_All;CL130.Contig1_All;CL130.Contig2_All;CL1303.Contig1_All;CL1303.Contig2_Al…
2_All;Unigene2948_All;Unigene29557_All;Unigene29617_All;Unigene29637_All;Unigene2972_All;Unigene2974_All;Unigene29841_All;Unigene29870_All;Unigene29899_All;Unigene2991_All;Unigene29944_All;Unigene30035_All;Unigene3011_All;Unigene30142_All;Unigene30145_All;Unigene30146_All;Unigene30178_All;Unigene30183_All;Unigene30192_All;Unigene301_All;Unigene30204_All;Unigene30241_All;Unigene30275_All;Unigene30…
481.Contig2_All;CL4620.Contig1_All;CL465.Contig1_All;CL4667.Contig1_All;CL4667.Contig3_All;CL4667.Contig4_All;CL4726.Contig1_All;CL4772.Contig1_All;CL4772.Contig2_All;CL4782.Contig1_All;CL4782.Contig2_All;CL4861.Contig1_All;CL4861.Contig2_All;CL4861.Contig3_All;CL4861.Contig4_All;CL487.Contig1_All;CL487.Contig2_All;CL4872.Contig1_All;CL4915.Contig3_All;CL4933.Contig2_All;CL4964.Contig1_All;CL4964…
_All;Unigene16459_All;Unigene16460_All;Unigene1654_All;Unigene16567_All;Unigene165_All;Unigene16606_All;Unigene1665_All;Unigene1666_All;Unigene16710_All;Unigene16714_All;Unigene16772_All;Unigene1683_All;Unigene16855_All;Unigene16881_All;Unigene1688_All;Unigene16942_All;Unigene16962_All;Unigene17034_All;Unigene1704_All;Unigene17054_All;Unigene17110_All;Unigene17126_All;Unigene17133_All;Unigene1714…
4.Contig3_All;CL2801.Contig2_All;CL2837.Contig2_All;CL2869.Contig1_All;CL2869.Contig2_All;CL2891.Contig1_All;CL2893.Contig1_All;CL2893.Contig2_All;CL2964.Contig1_All;CL2964.Contig2_All;CL3020.Contig2_All;CL3034.Contig1_All;CL3034.Contig2_All;CL3042.Contig1_All;CL3042.Contig2_All;CL3049.Contig1_All;CL3049.Contig2_All;CL3128.Contig1_All;CL3128.Contig3_All;CL3128.Contig4_All;CL3128.Contig5_All;CL313…
3.Contig1_All;Unigene10612_All;Unigene12420_All;Unigene14799_All;Unigene3241_All;Unigene4235_All;CL3279.Contig2_All;CL3279.Contig3_All;Unigene10437_All;CL4425.Contig1_All;CL4425.Contig2_All;Unigene12494_All;Unigene17415_All;Unigene12220_All;Unigene7894_All;Unigene18880_All;CL1375.Contig2_All;CL1729.Contig3_All;CL3215.Contig1_All;CL3619.Contig1_All;CL3619.Contig2_All;CL3891.Contig1_All;CL4118.Cont…
ne34143_All;Unigene34158_All;Unigene34231_All;Unigene34236_All;Unigene34256_All;Unigene34257_All;Unigene34385_All;Unigene34407_All;Unigene3441_All;Unigene34458_All;Unigene34547_All;Unigene34564_All;Unigene34706_All;Unigene34729_All;Unigene3475_All;Unigene34827_All;Unigene35002_All;Unigene35152_All;Unigene3561_All;Unigene3676_All;Unigene3724_All;Unigene3757_All;Unigene3833_All;Unigene3933_All;Unig…
cellular_component	cell junction	835	CL1045.Contig4_All;CL1084.Contig10_All;CL1084.Contig11_All;CL1084.Contig12_All;CL1084.Contig13_All;CL1084.Contig14_All;CL1084.Contig1_All;CL1084.Contig2_All;CL1084.Contig3_All;CL1084.Contig4_All;CL1084.Contig5_All;CL1084.Contig6_All;CL1084.Contig7_All;CL1084.Contig8_All;CL1084.Contig9_All;CL1145.Contig1_All;CL1145.Contig2_All;CL1145.Contig3_All;CL1146.Contig1_All;CL1146.Contig3_All;CL117.Contig2_…
cellular_component	cell part	16067	Unigene8007_All;CL1589.Contig1_All;CL17.Contig1_All;CL17.Contig2_All;CL17.Contig3_All;CL170.Contig1_All;CL170.Contig2_All;CL1708.Contig1_All;CL2222.Contig1_All;CL2222.Contig2_All;CL2222.Contig3_All;CL2223.Contig2_All;CL2285.Contig4_All;CL2538.Contig2_All;CL3099.Contig2_All;CL3518.Contig2_All;CL3518.Contig3_All;CL3814.Contig2_All;CL4303.Contig2_All;CL4885.Contig2_All;CL5199.Contig1_All;CL5199.Cont…
Unigene2671_All;Unigene2683_All;Unigene26866_All;Unigene26893_All;Unigene268_All;Unigene26929_All;Unigene2694_All;Unigene27041_All;Unigene27049_All;Unigene2714_All;Unigene27307_All;Unigene27350_All;Unigene27376_All;Unigene2737_All;Unigene27468_All;Unigene27497_All;Unigene27691_All;Unigene2789_All;Unigene28031_All;Unigene28042_All;Unigene2808_All;Unigene2813_All;Unigene28147_All;Unigene2825_All;Un…
_All;CL1145.Contig3_All;CL1157.Contig1_All;CL1157.Contig2_All;CL1179.Contig15_All;CL1179.Contig2_All;CL1188.Contig3_All;CL1192.Contig1_All;CL1192.Contig2_All;CL1205.Contig1_All;CL1205.Contig2_All;CL1208.Contig1_All;CL1208.Contig2_All;CL1251.Contig2_All;CL1251.Contig5_All;CL127.Contig1_All;CL127.Contig2_All;CL1271.Contig1_All;CL130.Contig1_All;CL130.Contig2_All;CL1303.Contig1_All;CL1303.Contig2_Al…
2_All;Unigene2948_All;Unigene29557_All;Unigene29617_All;Unigene29637_All;Unigene2972_All;Unigene2974_All;Unigene29841_All;Unigene29870_All;Unigene29899_All;Unigene2991_All;Unigene29944_All;Unigene30035_All;Unigene3011_All;Unigene30142_All;Unigene30145_All;Unigene30146_All;Unigene30178_All;Unigene30183_All;Unigene30192_All;Unigene301_All;Unigene30204_All;Unigene30241_All;Unigene30275_All;Unigene30…
481.Contig2_All;CL4620.Contig1_All;CL465.Contig1_All;CL4667.Contig1_All;CL4667.Contig3_All;CL4667.Contig4_All;CL4726.Contig1_All;CL4772.Contig1_All;CL4772.Contig2_All;CL4782.Contig1_All;CL4782.Contig2_All;CL4861.Contig1_All;CL4861.Contig2_All;CL4861.Contig3_All;CL4861.Contig4_All;CL487.Contig1_All;CL487.Contig2_All;CL4872.Contig1_All;CL4915.Contig3_All;CL4933.Contig2_All;CL4964.Contig1_All;CL4964…
_All;Unigene16459_All;Unigene16460_All;Unigene1654_All;Unigene16567_All;Unigene165_All;Unigene16606_All;Unigene1665_All;Unigene1666_All;Unigene16710_All;Unigene16714_All;Unigene16772_All;Unigene1683_All;Unigene16855_All;Unigene16881_All;Unigene1688_All;Unigene16942_All;Unigene16962_All;Unigene17034_All;Unigene1704_All;Unigene17054_All;Unigene17110_All;Unigene17126_All;Unigene17133_All;Unigene1714…
4.Contig3_All;CL2801.Contig2_All;CL2837.Contig2_All;CL2869.Contig1_All;CL2869.Contig2_All;CL2891.Contig1_All;CL2893.Contig1_All;CL2893.Contig2_All;CL2964.Contig1_All;CL2964.Contig2_All;CL3020.Contig2_All;CL3034.Contig1_All;CL3034.Contig2_All;CL3042.Contig1_All;CL3042.Contig2_All;CL3049.Contig1_All;CL3049.Contig2_All;CL3128.Contig1_All;CL3128.Contig3_All;CL3128.Contig4_All;CL3128.Contig5_All;CL313…
3.Contig1_All;Unigene10612_All;Unigene12420_All;Unigene14799_All;Unigene3241_All;Unigene4235_All;CL3279.Contig2_All;CL3279.Contig3_All;Unigene10437_All;CL4425.Contig1_All;CL4425.Contig2_All;Unigene12494_All;Unigene17415_All;Unigene12220_All;Unigene7894_All;Unigene18880_All;CL1375.Contig2_All;CL1729.Contig3_All;CL3215.Contig1_All;CL3619.Contig1_All;CL3619.Contig2_All;CL3891.Contig1_All;CL4118.Cont…
ne34143_All;Unigene34158_All;Unigene34231_All;Unigene34236_All;Unigene34256_All;Unigene34257_All;Unigene34385_All;Unigene34407_All;Unigene3441_All;Unigene34458_All;Unigene34547_All;Unigene34564_All;Unigene34706_All;Unigene34729_All;Unigene3475_All;Unigene34827_All;Unigene35002_All;Unigene35152_All;Unigene3561_All;Unigene3676_All;Unigene3724_All;Unigene3757_All;Unigene3833_All;Unigene3933_All;Unig…
cellular_component	extracellular matrix	19	CL1064.Contig1_All;Unigene17165_All;Unigene7542_All;CL393.Contig3_All;CL5868.Contig2_All;CL965.Contig2_All;Unigene13987_All;CL1990.Contig3_All;CL2812.Contig1_All;CL2812.Contig2_All;CL2812.Contig3_All;CL3182.Contig1_All;CL3182.Contig2_All;CL3182.Contig3_All;CL81.Contig2_All;CL81.Contig4_All;Unigene22117_All;Unigene5039_All;Unigene24270_All
cellular_component	extracellular matrix part	12	CL1990.Contig3_All;CL2812.Contig1_All;CL2812.Contig2_All;CL2812.Contig3_All;CL3182.Contig1_All;CL3182.Contig2_All;CL3182.Contig3_All;CL81.Contig2_All;CL81.Contig4_All;Unigene22117_All;Unigene5039_All;Unigene24270_All
cellular_component	extracellular region	1153	CL1771.Contig1_All;CL1771.Contig2_All;CL4026.Contig1_All;CL4026.Contig2_All;Unigene15487_All;Unigene16416_All;Unigene1854_All;Unigene32809_All;Unigene5214_All;Unigene8101_All;CL2773.Contig4_All;CL3802.Contig1_All;CL4040.Contig1_All;Unigene10615_All;Unigene23041_All;Unigene29113_All;Unigene5185_All;CL1005.Contig4_All;CL1045.Contig4_All;CL1064.Contig1_All;CL1230.Contig1_All;CL1230.Contig2_All;CL137…
cellular_component	extracellular region part	17	CL1771.Contig1_All;CL1771.Contig2_All;CL4026.Contig1_All;CL4026.Contig2_All;Unigene15487_All;Unigene16416_All;Unigene1854_All;Unigene32809_All;Unigene5214_All;Unigene8101_All;CL2773.Contig4_All;CL3802.Contig1_All;CL4040.Contig1_All;Unigene10615_All;Unigene23041_All;Unigene29113_All;Unigene5185_All
cellular_component	macromolecular complex	2605	Unigene8007_All;Unigene1149_All;CL1589.Contig1_All;CL17.Contig1_All;CL17.Contig2_All;CL17.Contig3_All;CL170.Contig1_All;CL170.Contig2_All;CL1708.Contig1_All;CL2222.Contig1_All;CL2222.Contig2_All;CL2222.Contig3_All;CL2223.Contig2_All;CL2285.Contig4_All;CL2538.Contig2_All;CL3099.Contig2_All;CL3518.Contig2_All;CL3518.Contig3_All;CL3814.Contig2_All;CL4303.Contig2_All;CL4885.Contig2_All;CL5199.Contig1…
igene2313_All;Unigene24015_All;Unigene2574_All;Unigene2833_All;Unigene28737_All;Unigene295_All;Unigene29748_All;Unigene35090_All;Unigene377_All;Unigene5150_All;Unigene5251_All;Unigene5261_All;Unigene5318_All;Unigene5320_All;Unigene5798_All;Unigene5941_All;Unigene8214_All;Unigene8370_All;Unigene8531_All;Unigene864_All;Unigene9362_All;Unigene9612_All;Unigene9930_All;Unigene9950_All;Unigene22969_All…
cellular_component	membrane	6770	Unigene8218_All;Unigene18716_All;Unigene16118_All;Unigene17148_All;Unigene4505_All;Unigene383_All;CL104.Contig3_All;CL1139.Contig1_All;CL1139.Contig2_All;CL1190.Contig1_All;CL1190.Contig2_All;CL2252.Contig3_All;CL4309.Contig1_All;CL4309.Contig2_All;CL4309.Contig4_All;CL4874.Contig1_All;CL4874.Contig2_All;CL5002.Contig1_All;CL5002.Contig2_All;CL5688.Contig1_All;CL5688.Contig2_All;CL582.Contig2_All…
9_All;Unigene15245_All;Unigene15258_All;Unigene15277_All;Unigene15282_All;Unigene15289_All;Unigene15310_All;Unigene15314_All;Unigene15322_All;Unigene15340_All;Unigene15373_All;Unigene15387_All;Unigene15397_All;Unigene15414_All;Unigene15424_All;Unigene15435_All;Unigene1544_All;Unigene15453_All;Unigene15472_All;Unigene15481_All;Unigene15487_All;Unigene15493_All;Unigene15502_All;Unigene155_All;Unige…
l;CL1848.Contig3_All;CL1854.Contig1_All;CL1855.Contig2_All;CL1866.Contig1_All;CL1866.Contig2_All;CL1866.Contig3_All;CL1875.Contig1_All;CL1875.Contig2_All;CL1875.Contig3_All;CL1875.Contig4_All;CL1914.Contig3_All;CL1914.Contig4_All;CL1914.Contig5_All;CL1914.Contig6_All;CL1922.Contig1_All;CL1922.Contig2_All;CL193.Contig1_All;CL193.Contig2_All;CL1977.Contig1_All;CL2006.Contig1_All;CL2006.Contig2_All;…
ll;CL4325.Contig3_All;CL4325.Contig4_All;CL4381.Contig1_All;CL4381.Contig2_All;CL4381.Contig3_All;CL441.Contig1_All;CL441.Contig2_All;CL4413.Contig3_All;CL4505.Contig1_All;CL4505.Contig2_All;CL451.Contig1_All;CL451.Contig2_All;CL451.Contig3_All;CL454.Contig1_All;CL454.Contig3_All;CL454.Contig4_All;CL454.Contig5_All;CL454.Contig6_All;CL454.Contig7_All;CL454.Contig8_All;CL4552.Contig1_All;CL4668.Co…
cellular_component	membrane part	2099	Unigene18716_All;Unigene16118_All;Unigene17148_All;Unigene4505_All;Unigene383_All;CL104.Contig3_All;CL1139.Contig1_All;CL1139.Contig2_All;CL1190.Contig1_All;CL1190.Contig2_All;CL2252.Contig3_All;CL4309.Contig1_All;CL4309.Contig2_All;CL4309.Contig4_All;CL4874.Contig1_All;CL4874.Contig2_All;CL5002.Contig1_All;CL5002.Contig2_All;CL5688.Contig1_All;CL5688.Contig2_All;CL582.Contig2_All;Unigene1087_All…
ene7515_All;Unigene9992_All;CL678.Contig1_All;CL678.Contig2_All;Unigene13977_All;Unigene22225_All;Unigene5353_All;CL3560.Contig1_All;CL3560.Contig2_All;CL904.Contig1_All;CL904.Contig2_All;CL904.Contig3_All;CL904.Contig4_All;CL904.Contig5_All;Unigene14004_All;Unigene2640_All;Unigene6676_All;Unigene9977_All;Unigene18779_All;Unigene2902_All;Unigene13959_All;Unigene15424_All;Unigene16239_All;Unigene1…
cellular_component	membrane-enclosed lumen	1085	Unigene14857_All;Unigene10894_All;Unigene12833_All;Unigene16783_All;Unigene17289_All;Unigene18395_All;Unigene20779_All;Unigene23001_All;Unigene27447_All;Unigene29790_All;Unigene31015_All;Unigene3840_All;Unigene4796_All;Unigene8453_All;CL3083.Contig1_All;CL3083.Contig2_All;CL3083.Contig3_All;CL5825.Contig1_All;CL5825.Contig2_All;CL6114.Contig1_All;CL6114.Contig2_All;CL831.Contig1_All;CL831.Contig2…
cellular_component	nucleoid	53	CL2687.Contig1_All;CL2687.Contig2_All;CL2687.Contig3_All;CL3789.Contig3_All;CL3789.Contig4_All;CL3789.Contig5_All;CL3789.Contig6_All;CL3789.Contig7_All;CL5922.Contig1_All;CL5922.Contig2_All;CL61.Contig1_All;CL628.Contig1_All;CL628.Contig2_All;CL865.Contig1_All;CL865.Contig2_All;Unigene14964_All;Unigene18522_All;Unigene19446_All;Unigene22034_All;Unigene382_All;Unigene637_All;Unigene7931_All;Unigen…
cellular_component	organelle	12849	Unigene8007_All;CL1000.Contig1_All;CL1000.Contig2_All;CL1000.Contig3_All;CL1000.Contig4_All;CL1050.Contig1_All;CL1050.Contig2_All;CL1088.Contig1_All;CL1088.Contig3_All;CL1088.Contig5_All;CL1160.Contig1_All;CL1160.Contig2_All;CL121.Contig1_All;CL121.Contig2_All;CL1211.Contig1_All;CL1211.Contig3_All;CL1211.Contig4_All;CL1211.Contig5_All;CL1253.Contig2_All;CL1293.Contig1_All;CL1293.Contig2_All;CL132…
35_All;Unigene383_All;Unigene3929_All;Unigene3937_All;Unigene394_All;Unigene4085_All;Unigene4211_All;Unigene4293_All;Unigene4300_All;Unigene4311_All;Unigene4386_All;Unigene4426_All;Unigene4453_All;Unigene4543_All;Unigene4585_All;Unigene460_All;Unigene4625_All;Unigene462_All;Unigene4656_All;Unigene4667_All;Unigene4669_All;Unigene4680_All;Unigene4685_All;Unigene4701_All;Unigene4983_All;Unigene5032_…
ll;CL6253.Contig1_All;CL6253.Contig2_All;CL6314.Contig1_All;CL6330.Contig1_All;CL6330.Contig2_All;CL636.Contig1_All;CL636.Contig2_All;CL6377.Contig1_All;CL6420.Contig1_All;CL6433.Contig2_All;CL6456.Contig1_All;CL6456.Contig2_All;CL6474.Contig2_All;CL6475.Contig1_All;CL692.Contig3_All;CL694.Contig1_All;CL762.Contig2_All;CL767.Contig16_All;CL767.Contig2_All;CL787.Contig1_All;CL787.Contig2_All;CL913…
igene13909_All;Unigene13927_All;Unigene13969_All;Unigene13980_All;Unigene13995_All;Unigene1399_All;Unigene14003_All;Unigene14011_All;Unigene14026_All;Unigene14041_All;Unigene14055_All;Unigene14056_All;Unigene14068_All;Unigene14158_All;Unigene1418_All;Unigene14244_All;Unigene14287_All;Unigene14319_All;Unigene14358_All;Unigene14379_All;Unigene14384_All;Unigene14389_All;Unigene14395_All;Unigene14407…
l;CL1269.Contig3_All;CL1269.Contig4_All;CL1299.Contig1_All;CL1299.Contig2_All;CL130.Contig1_All;CL1307.Contig1_All;CL1307.Contig2_All;CL1307.Contig3_All;CL1307.Contig4_All;CL1307.Contig5_All;CL1321.Contig2_All;CL1336.Contig1_All;CL1336.Contig2_All;CL1346.Contig1_All;CL1346.Contig2_All;CL1368.Contig1_All;CL1368.Contig2_All;CL1401.Contig1_All;CL1401.Contig2_All;CL1401.Contig3_All;CL1401.Contig4_All…
tig2_All;CL2379.Contig1_All;CL2379.Contig2_All;CL2384.Contig1_All;CL239.Contig3_All;CL2417.Contig7_All;CL2420.Contig2_All;CL2420.Contig3_All;CL2420.Contig4_All;CL2421.Contig1_All;CL2427.Contig1_All;CL2427.Contig2_All;CL2443.Contig1_All;CL2443.Contig2_All;CL2446.Contig1_All;CL2448.Contig1_All;CL2448.Contig2_All;CL2449.Contig1_All;CL2449.Contig2_All;CL2450.Contig1_All;CL2450.Contig2_All;CL2459.Cont…
Unigene32014_All;Unigene32153_All;Unigene32207_All;Unigene3221_All;Unigene32325_All;Unigene3234_All;Unigene32360_All;Unigene32380_All;Unigene3239_All;Unigene32401_All;Unigene32430_All;Unigene3246_All;Unigene3248_All;Unigene32493_All;Unigene3249_All;Unigene32513_All;Unigene32527_All;Unigene3257_All;Unigene32610_All;Unigene3264_All;Unigene3265_All;Unigene3266_All;Unigene32681_All;Unigene32781_All;U…
ll;Unigene5841_All;Unigene5855_All;Unigene6452_All;Unigene6525_All;Unigene654_All;Unigene6552_All;Unigene655_All;Unigene6562_All;Unigene6662_All;Unigene666_All;Unigene6681_All;Unigene6751_All;Unigene6776_All;Unigene6790_All;Unigene6824_All;Unigene6849_All;Unigene6855_All;Unigene6865_All;Unigene689_All;Unigene700_All;Unigene709_All;Unigene7106_All;Unigene7139_All;Unigene7142_All;Unigene7586_All;Un…
cellular_component	organelle part	4249	Unigene8007_All;CL1000.Contig1_All;CL1000.Contig2_All;CL1000.Contig3_All;CL1000.Contig4_All;CL1050.Contig1_All;CL1050.Contig2_All;CL1088.Contig1_All;CL1088.Contig3_All;CL1088.Contig5_All;CL1160.Contig1_All;CL1160.Contig2_All;CL121.Contig1_All;CL121.Contig2_All;CL1211.Contig1_All;CL1211.Contig3_All;CL1211.Contig4_All;CL1211.Contig5_All;CL1253.Contig2_All;CL1293.Contig1_All;CL1293.Contig2_All;CL132…
2_All;CL1995.Contig1_All;CL2006.Contig1_All;CL2006.Contig2_All;CL2135.Contig1_All;CL2135.Contig2_All;CL2357.Contig1_All;CL2357.Contig2_All;CL2357.Contig3_All;CL2524.Contig2_All;CL2524.Contig3_All;CL2616.Contig3_All;CL2616.Contig4_All;CL2616.Contig5_All;CL2616.Contig6_All;CL2618.Contig1_All;CL2618.Contig2_All;CL2618.Contig3_All;CL2618.Contig4_All;CL2741.Contig2_All;CL2849.Contig1_All;CL2849.Contig…
378_All;Unigene8764_All;Unigene14045_All;Unigene19423_All;Unigene2980_All;Unigene14974_All;CL61.Contig1_All;Unigene8106_All;CL565.Contig2_All;Unigene14405_All;Unigene17105_All;Unigene19655_All;Unigene2001_All;Unigene21963_All;Unigene4253_All;Unigene523_All;Unigene7348_All;CL1307.Contig6_All;CL1771.Contig1_All;CL1771.Contig2_All;CL2939.Contig1_All;CL2939.Contig2_All;CL3433.Contig1_All;CL3433.Conti…
cellular_component	symplast	835	CL1045.Contig4_All;CL1084.Contig10_All;CL1084.Contig11_All;CL1084.Contig12_All;CL1084.Contig13_All;CL1084.Contig14_All;CL1084.Contig1_All;CL1084.Contig2_All;CL1084.Contig3_All;CL1084.Contig4_All;CL1084.Contig5_All;CL1084.Contig6_All;CL1084.Contig7_All;CL1084.Contig8_All;CL1084.Contig9_All;CL1145.Contig1_All;CL1145.Contig2_All;CL1145.Contig3_All;CL1146.Contig1_All;CL1146.Contig3_All;CL117.Contig2_…
cellular_component	virion	3	Unigene12768_All;Unigene17436_All;Unigene7716_All
cellular_component	virion part	3	Unigene12768_All;Unigene17436_All;Unigene7716_All
molecular_function	antioxidant activity	227	CL1701.Contig1_All;CL1701.Contig2_All;CL1701.Contig3_All;CL5984.Contig1_All;Unigene11057_All;Unigene13785_All;Unigene17192_All;Unigene19191_All;Unigene21901_All;Unigene22016_All;Unigene6896_All;Unigene765_All;Unigene11538_All;Unigene11549_All;Unigene16763_All;Unigene17788_All;Unigene527_All;Unigene13903_All;CL1463.Contig1_All;CL1463.Contig2_All;CL1463.Contig3_All;CL1463.Contig4_All;CL382.Contig1_…
molecular_function	binding	10269	Unigene10214_All;CL2819.Contig2_All;CL2819.Contig3_All;Unigene12341_All;Unigene19435_All;Unigene5430_All;Unigene7317_All;CL4629.Contig1_All;CL4629.Contig2_All;CL2089.Contig1_All;CL2089.Contig2_All;CL2089.Contig3_All;CL2260.Contig1_All;CL2260.Contig2_All;CL566.Contig1_All;CL5708.Contig1_All;CL754.Contig1_All;CL754.Contig3_All;Unigene17916_All;Unigene18782_All;Unigene19614_All;Unigene21706_All;Unig…
l;Unigene28331_All;Unigene28574_All;Unigene28680_All;Unigene28695_All;Unigene2912_All;Unigene29141_All;Unigene29423_All;Unigene2945_All;Unigene29697_All;Unigene296_All;Unigene30548_All;Unigene3067_All;Unigene30794_All;Unigene30824_All;Unigene30845_All;Unigene308_All;Unigene3109_All;Unigene3111_All;Unigene31305_All;Unigene31339_All;Unigene31448_All;Unigene31502_All;Unigene31517_All;Unigene3155_All…
Contig2_All;CL4481.Contig1_All;CL4481.Contig2_All;CL4481.Contig3_All;CL4494.Contig1_All;CL4504.Contig1_All;CL4504.Contig2_All;CL4504.Contig3_All;CL4620.Contig2_All;CL4621.Contig1_All;CL4621.Contig2_All;CL4625.Contig2_All;CL4627.Contig1_All;CL4718.Contig1_All;CL473.Contig1_All;CL473.Contig2_All;CL4887.Contig1_All;CL4887.Contig2_All;CL491.Contig1_All;CL491.Contig2_All;CL4934.Contig2_All;CL4966.Cont…
CL4040.Contig1_All;CL4041.Contig1_All;CL4041.Contig2_All;CL4064.Contig2_All;CL4072.Contig2_All;CL412.Contig1_All;CL4121.Contig2_All;CL4122.Contig2_All;CL4146.Contig1_All;CL4186.Contig1_All;CL4186.Contig2_All;CL4189.Contig2_All;CL4217.Contig1_All;CL4217.Contig2_All;CL4221.Contig1_All;CL4221.Contig2_All;CL4236.Contig1_All;CL4236.Contig2_All;CL4236.Contig3_All;CL4272.Contig10_All;CL4272.Contig11_All…
tig2_All;CL849.Contig3_All;CL885.Contig1_All;CL885.Contig2_All;CL941.Contig1_All;CL941.Contig2_All;CL941.Contig3_All;CL941.Contig4_All;CL973.Contig1_All;CL973.Contig2_All;Unigene10059_All;Unigene10255_All;Unigene10330_All;Unigene10341_All;Unigene10390_All;Unigene10478_All;Unigene10488_All;Unigene10969_All;Unigene11017_All;Unigene1114_All;Unigene11203_All;Unigene11444_All;Unigene11446_All;Unigene1…
_All;Unigene16997_All;Unigene17570_All;Unigene18382_All;Unigene18791_All;Unigene18859_All;Unigene19633_All;Unigene19673_All;Unigene20069_All;Unigene20098_All;Unigene20139_All;Unigene20366_All;Unigene20733_All;Unigene20799_All;Unigene22168_All;Unigene22227_All;Unigene22576_All;Unigene22766_All;Unigene23355_All;Unigene2365_All;Unigene24381_All;Unigene24459_All;Unigene245_All;Unigene24897_All;Unigen…
molecular_function	catalytic activity	12097	CL2587.Contig1_All;Unigene2644_All;Unigene12937_All;CL3312.Contig1_All;CL6425.Contig1_All;CL6425.Contig4_All;CL971.Contig2_All;CL971.Contig5_All;Unigene1256_All;Unigene13448_All;Unigene14058_All;Unigene18425_All;Unigene24279_All;Unigene30261_All;Unigene3061_All;Unigene32665_All;Unigene4167_All;CL1851.Contig2_All;CL3534.Contig2_All;CL3534.Contig3_All;CL4940.Contig2_All;CL994.Contig1_All;CL994.Cont…
45_All;Unigene30523_All;Unigene337_All;Unigene33919_All;Unigene34844_All;Unigene3763_All;Unigene5321_All;Unigene5419_All;Unigene8869_All;Unigene912_All;Unigene9584_All;Unigene9871_All;Unigene27366_All;Unigene29254_All;Unigene9311_All;Unigene5218_All;CL2926.Contig1_All;CL729.Contig4_All;Unigene24338_All;Unigene8419_All;CL157.Contig1_All;CL157.Contig2_All;CL157.Contig3_All;CL2056.Contig1_All;CL2056…
877_All;Unigene4754_All;CL6243.Contig1_All;CL6243.Contig2_All;Unigene19469_All;Unigene7402_All;Unigene13888_All;Unigene26571_All;CL106.Contig1_All;CL106.Contig2_All;CL3149.Contig1_All;CL3149.Contig2_All;CL4972.Contig1_All;CL753.Contig1_All;CL753.Contig2_All;Unigene11042_All;Unigene24670_All;Unigene34674_All;Unigene3689_All;Unigene1485_All;Unigene2836_All;Unigene32157_All;Unigene33604_All;CL5961.C…
ntig2_All;Unigene23143_All;Unigene21950_All;Unigene10221_All;Unigene11720_All;Unigene16962_All;Unigene21000_All;Unigene2702_All;Unigene5007_All;Unigene11520_All;Unigene18879_All;Unigene19846_All;Unigene30457_All;Unigene15500_All;Unigene4426_All;CL1694.Contig1_All;CL1694.Contig3_All;CL5489.Contig1_All;CL5489.Contig2_All;Unigene16607_All;Unigene23216_All;Unigene412_All;Unigene22184_All;Unigene2624_…
All;Unigene16598_All;Unigene16789_All;Unigene17552_All;Unigene17781_All;Unigene18145_All;Unigene18958_All;Unigene19859_All;Unigene20300_All;Unigene21467_All;Unigene23079_All;Unigene24307_All;Unigene24320_All;Unigene24576_All;Unigene24661_All;Unigene24693_All;Unigene24766_All;Unigene2501_All;Unigene2502_All;Unigene25940_All;Unigene26113_All;Unigene26682_All;Unigene26694_All;Unigene26776_All;Unigen…
e34873_All;Unigene3506_All;Unigene35117_All;Unigene3756_All;Unigene3906_All;Unigene3967_All;Unigene4009_All;Unigene414_All;Unigene416_All;Unigene4359_All;Unigene4364_All;Unigene439_All;Unigene4471_All;Unigene4865_All;Unigene4869_All;Unigene4871_All;Unigene4873_All;Unigene4875_All;Unigene4876_All;Unigene4877_All;Unigene4878_All;Unigene4879_All;Unigene4882_All;Unigene4883_All;Unigene491_All;Unigene…
;Unigene32904_All;Unigene35151_All;Unigene6737_All;Unigene7048_All;Unigene7074_All;Unigene7628_All;Unigene9574_All;Unigene9745_All;CL3.Contig1_All;CL3840.Contig2_All;CL3840.Contig3_All;CL3840.Contig4_All;Unigene19479_All;Unigene24714_All;Unigene28201_All;Unigene32871_All;CL2819.Contig2_All;CL2819.Contig3_All;Unigene5430_All;Unigene7317_All;CL5764.Contig1_All;CL214.Contig14_All;CL214.Contig4_All;C…
molecular_function	channel regulator activity	3	CL5944.Contig1_All;CL5944.Contig2_All;Unigene4391_All
molecular_function	electron carrier activity	344	CL1765.Contig1_All;CL1765.Contig2_All;Unigene16196_All;Unigene16744_All;Unigene16756_All;Unigene4083_All;Unigene4611_All;Unigene15521_All;Unigene17430_All;Unigene33315_All;Unigene5667_All;CL2368.Contig1_All;CL2368.Contig2_All;CL2368.Contig3_All;Unigene10112_All;Unigene16379_All;Unigene17283_All;CL101.Contig1_All;CL101.Contig2_All;CL1029.Contig1_All;CL1058.Contig1_All;CL1118.Contig2_All;CL1168.Con…
molecular_function	enzyme regulator activity	221	Unigene25774_All;CL2959.Contig1_All;CL2959.Contig2_All;CL3505.Contig1_All;CL3505.Contig2_All;CL382.Contig3_All;CL3952.Contig2_All;CL5502.Contig1_All;CL5502.Contig2_All;CL5502.Contig3_All;Unigene16036_All;Unigene16176_All;Unigene18381_All;Unigene20162_All;Unigene21411_All;Unigene23673_All;Unigene283_All;Unigene374_All;Unigene4809_All;Unigene9629_All;CL1670.Contig1_All;CL1670.Contig2_All;CL724.Cont…
molecular_function	metallochaperone activity	7	CL5348.Contig1_All;CL5348.Contig2_All;CL5348.Contig3_All;Unigene11973_All;Unigene14374_All;Unigene2310_All;Unigene23589_All
molecular_function	molecular transducer activity	303	CL1252.Contig1_All;CL1882.Contig1_All;CL1882.Contig2_All;CL1882.Contig3_All;CL1899.Contig2_All;CL2439.Contig2_All;CL2439.Contig3_All;CL2439.Contig4_All;CL3778.Contig1_All;CL3778.Contig2_All;CL4731.Contig1_All;CL5823.Contig1_All;CL5823.Contig2_All;CL6157.Contig1_All;CL6402.Contig2_All;CL6402.Contig3_All;Unigene11439_All;Unigene12177_All;Unigene13406_All;Unigene13672_All;Unigene14924_All;Unigene171…
molecular_function	nucleic acid binding transcription factor activity	418	CL1224.Contig1_All;CL1240.Contig1_All;CL1240.Contig2_All;CL1240.Contig3_All;CL1240.Contig4_All;CL1240.Contig5_All;CL1289.Contig1_All;CL1289.Contig2_All;CL1380.Contig5_All;CL1438.Contig1_All;CL1438.Contig2_All;CL1448.Contig4_All;CL1520.Contig1_All;CL1520.Contig2_All;CL1651.Contig1_All;CL1677.Contig1_All;CL1703.Contig1_All;CL1703.Contig2_All;CL1703.Contig3_All;CL1703.Contig4_All;CL172.Contig1_All;C…
molecular_function	nutrient reservoir activity	14	CL1512.Contig1_All;CL1512.Contig2_All;CL2026.Contig1_All;CL2026.Contig3_All;CL36.Contig5_All;Unigene10138_All;Unigene10866_All;Unigene13987_All;Unigene24435_All;Unigene26122_All;Unigene26630_All;Unigene31232_All;Unigene32611_All;Unigene4438_All
molecular_function	protein binding transcription factor activity	51	CL1324.Contig2_All;CL1324.Contig3_All;CL1647.Contig4_All;CL4391.Contig1_All;CL4542.Contig2_All;CL4670.Contig1_All;CL4670.Contig2_All;CL885.Contig1_All;CL885.Contig2_All;Unigene15000_All;Unigene1517_All;Unigene1776_All;Unigene22146_All;Unigene22328_All;Unigene32360_All;Unigene6859_All;Unigene8264_All;Unigene14627_All;Unigene17148_All;Unigene22056_All;Unigene2473_All;Unigene4505_All;Unigene6360_All…
molecular_function	protein tag	3	CL4003.Contig1_All;CL4003.Contig2_All;Unigene11390_All
molecular_function	receptor activity	152	CL2316.Contig2_All;CL4721.Contig1_All;CL4721.Contig2_All;CL5002.Contig1_All;Unigene10121_All;Unigene11827_All;Unigene12132_All;Unigene12133_All;Unigene12134_All;Unigene12509_All;Unigene16355_All;Unigene16415_All;Unigene17756_All;Unigene18436_All;Unigene1980_All;Unigene22554_All;Unigene23773_All;Unigene23843_All;Unigene24251_All;Unigene2748_All;Unigene33456_All;Unigene6634_All;Unigene9590_All;CL51…
molecular_function	structural molecule activity	744	Unigene18323_All;Unigene21563_All;Unigene34904_All;Unigene9099_All;CL1000.Contig4_All;CL1050.Contig2_All;CL116.Contig1_All;CL116.Contig2_All;CL116.Contig3_All;CL116.Contig4_All;CL1332.Contig1_All;CL1338.Contig1_All;CL1338.Contig2_All;CL1407.Contig1_All;CL1415.Contig1_All;CL1415.Contig2_All;CL1415.Contig3_All;CL1425.Contig1_All;CL1425.Contig2_All;CL1451.Contig1_All;CL1506.Contig1_All;CL1730.Contig…
molecular_function	translation regulator activity	4	CL2345.Contig1_All;CL2345.Contig2_All;CL2345.Contig3_All;Unigene304_All
molecular_function	transporter activity	1545	CL2310.Contig1_All;CL3154.Contig1_All;CL3154.Contig3_All;CL3154.Contig4_All;CL4800.Contig1_All;CL4800.Contig2_All;CL630.Contig4_All;CL630.Contig5_All;Unigene10050_All;Unigene12479_All;Unigene14065_All;Unigene17168_All;Unigene17428_All;Unigene17783_All;Unigene19562_All;Unigene2233_All;Unigene23537_All;Unigene28498_All;Unigene2957_All;Unigene31195_All;Unigene31575_All;Unigene32833_All;Unigene32852_…

## Sheet: Table S3
Table S3. The top 50 most up-regulated and down-regulated genes.
geneID(6345)	KO_id	Pathway	Up-Down-Regulation(SNP/control)	log2 Ratio(SNP/control)	Nr-ID	control_rawfragments(19101792)	SNP_rawfragments(21004269)	control_FPKM	SNP_FPKM	FDR
Unigene32558_All	--		Up	16.3025	gi|383100992|emb|CCD74534.1|	0	1095	0	80.8252	5.8e-306
Unigene31605_All	--		Up	14.8923	--	0	580	0	30.4113	1.71e-161
Unigene32649_All	K01501	Cyanoamino acid metabolism, Tryptophan metabolism, Aminobenzoate degradation, Styrene degradation, Nitrogen metabolism	Up	14.7731	gi|348690846|gb|EGZ30660.1|	0	594	0	28	2.08e-165
Unigene32533_All	K00134	Carbon metabolism ,Biosynthesis of amino acids,Glycolysis / Gluconeogenesis,Carbon fixation in photosynthetic organisms,HIF-1 signaling pathway,Alzheimer's disease	Up	14.0369	gi|226495473|ref|NP_001147336.1|	0	203	0	16.8082	4.43e-56
Unigene32716_All	--		Up	13.9466	--	0	195	0	15.7888	7.58e-54
Unigene32648_All	--		Up	13.802	--	0	105	0	14.2828	8.24e-29
Unigene32718_All	--		Up	13.736	--	0	94	0	13.6441	9.13e-26
CL4883.Contig1_All	--		Up	13.4812	--	0	98	0	11.4356	7.16e-27
CL1533.Contig2_All	--		Up	13.4283	gi|116778967|gb|ABK21078.1|	0	69	0	11.0236	7.3e-19
Unigene32719_All	--		Up	13.4122	gi|15220851|ref|NP_173784.1|	0	177	0	10.9015	7.9e-49
Unigene32334_All	--		Up	13.31	--	0	141	0	10.1557	8.36e-39
CL6269.Contig1_All	K03231	RNA transport,Legionellosis	Up	13.2826	gi|301111276|ref|XP_002904717.1|	0	108	0	9.9648	1.21e-29
Unigene32728_All	--		Up	13.2782	--	0	53	0	9.9342	1.81e-14
Unigene30281_All	--		Up	13.2705	--	0	44	0	9.8812	5.2e-12
CL1936.Contig2_All	--		Up	13.1932	gi|116792852|gb|ABK26526.1|	0	72	0	9.3658	1.08e-19
Unigene30246_All	K03231	RNA transport,Legionellosis	Up	13.1653	gi|301111276|ref|XP_002904717.1|	0	148	0	9.1867	9.35e-41
Unigene32730_All	K02978	Ribosome	Up	13.1325	gi|323451608|gb|EGB07485.1|	0	53	0	8.9797	1.81e-14
Unigene31369_All	--		Up	13.1289	--	0	54	0	8.9579	9.66e-15
Unigene30428_All	--		Up	13.1081	--	0	102	0	8.8294	5.58e-28
Unigene32343_All	--		Up	13.032	gi|1350533|gb|AAB01601.1|	0	57	0	8.3757	1.45e-15
CL5964.Contig2_All	K00522	Mineral absorption	Up	13.0043	gi|357161316|ref|XP_003579051.1|	0	141	0	8.2165	8.36e-39
Unigene32753_All	K12822	Spliceosome	Up	12.9979	gi|145324176|ref|NP_001077677.1|	0	50	0	8.1803	1.19e-13
Unigene32749_All	K02872	Ribosome	Up	12.9971	gi|348681274|gb|EGZ21090.1|	0	51	0	8.1753	6.39e-14
Unigene32735_All	K02928	Ribosome	Up	12.9449	gi|299115336|emb|CBN74156.1|	0	53	0	7.8853	1.81e-14
CL1596.Contig2_All	--		Up	12.9227	gi|224057866|ref|XP_002299363.1|	0	38	0	7.7646	2.25e-10
Unigene26402_All	--		Down	-14.4891	--	405	0	22.9959	0	3.58e-129
Unigene26972_All	--		Down	-14.1336	--	149	0	17.9731	0	3.64e-47
Unigene26973_All	--		Down	-13.9755	--	88	0	16.108	0	1.01e-27
Unigene26208_All	--		Down	-13.8722	--	114	0	14.995	0	5.42e-36
Unigene26975_All	--		Down	-13.586	--	210	0	12.2972	0	1.13e-66
Unigene26192_All	--		Down	-13.5171	--	58	0	11.7234	0	3.23e-18
Unigene26396_All	--		Down	-13.4969	--	70	0	11.5602	0	5.16e-22
Unigene26411_All	--		Down	-13.4456	--	91	0	11.1568	0	1.13e-28
Unigene26220_All	--		Down	-13.3724	--	79	0	10.6045	0	7.24e-25
Unigene26774_All	--		Down	-13.3437	--	56	0	10.396	0	1.38e-17
Unigene25405_All	--		Down	-13.3211	--	52	0	10.2341	0	2.51e-16
Unigene27000_All	--		Down	-13.2819	--	39	0	9.9595	0	3e-12
Unigene26994_All	--		Down	-13.2033	gi|307101894|gb|EFN50453.1|	69	0	9.4314	0	1.07e-21
Unigene25360_All	--		Down	-13.1926	--	49	0	9.3621	0	2.21e-15
Unigene24544_All	--		Down	-13.1199	--	42	0	8.9018	0	3.46e-13
Unigene24380_All	--		Down	-13.0839	gi|149688558|gb|ABR27724.1|	34	0	8.6826	0	1.1e-10
CL906.Contig1_All	--		Down	-13.0338	--	33	0	8.3863	0	2.26e-10
Unigene27006_All	--		Down	-13.0017	--	47	0	8.2017	0	9.38e-15
Unigene25402_All	--		Down	-12.9732	--	49	0	8.0414	0	2.21e-15
Unigene26398_All	--		Down	-12.939	--	39	0	7.8527	0	3e-12
Unigene26409_All	--		Down	-12.9324	gi|300176047|emb|CBK23358.2|	33	0	7.8171	0	2.26e-10
Unigene27012_All	--		Down	-12.9088	--	52	0	7.69	0	2.51e-16
Unigene27044_All	--		Down	-12.9042	--	41	0	7.6657	0	7.09e-13
Unigene26395_All	--		Down	-12.8406	--	95	0	7.3353	0	6.05e-30
Unigene26640_All	K13448	Plant-pathogen interaction	Down	-12.8254	gi|2224913|gb|AAB61709.1|	47	0	7.2581	0	9.38e-15

## Sheet: Table S4
Table S4. Differentially expressed genes related to nitrate reductase activity, response to organic nitrogen, nitrate transport.
nitrate reductase activity	Unigene19806_All, Unigene11797_All
response to organic nitrogen	Unigene11376_All, Unigene22761_All, Unigene30214_All, CL1267.Contig1_All, CL2343.Contig4_All, CL551.Contig3_All, CL2198.Contig2_All, Unigene13797_All, CL5951.Contig3_All, CL551.Contig2_All, Unigene26133_All, CL3790.Contig2_All, Unigene32226_All, Unigene27108_All, CL3430.Contig1_All, CL1039.Contig3_All, CL138.Contig1_All, CL2642.Contig2_All, Unigene19971_All, CL138.Contig3_All, CL255.Contig2_All, …
nitrate transport	CL1984.Contig1_All, CL6163.Contig2_All, CL5530.Contig1_All, Unigene19719_All, CL2664.Contig3_All, Unigene32048_All, CL2664.Contig1_All, CL6186.Contig1_All, CL4160.Contig1_All, Unigene19995_All, CL1180.Contig3_All, Unigene4738_All, CL6163.Contig3_All, Unigene3050_All, CL6163.Contig1_All, Unigene24069_All, Unigene8938_All, Unigene15105_All, Unigene21917_All
cell wall modification	CL635.Contig2_All, Unigene2865_All, Unigene14333_All, Unigene5818_All, CL3297.Contig1_All, Unigene7686_All, CL1757.Contig3_All, Unigene32674_All, CL1499.Contig4_All, Unigene32788_All, CL923.Contig2_All, CL1556.Contig2_All, Unigene31930_All, CL771.Contig4_All, Unigene28058_All, Unigene31868_All, Unigene31672_All, Unigene23632_All, Unigene6501_All, CL3151.Contig4_All, Unigene457_All, CL148.Contig2_…

## Sheet: Table S5
Table S5. Differentially expressed genes with pathway annotation.
Pathway	DEGs genes with pathway annotation (2670)	Pvalue	Qvalue	Pathway ID
Metabolic pathways	945	4.5335e-42	5.4402e-40	ko01100
Biosynthesis of secondary metabolites	573	4.8356e-34	1.93424e-32	ko01110
Ribosome	213	7.29126e-32	2.18738e-30	ko03010
Phenylpropanoid biosynthesis	200	5.55472e-39	3.33283e-37	ko00940
Plant-pathogen interaction	157	0.69634	1	ko04626
Glycerophospholipid metabolism	141	1.86583e-19	3.73165e-18	ko00564
Plant hormone signal transduction	140	0.456485	0.867121	ko04075
Endocytosis	130	8.60612e-14	9.38849e-13	ko04144
Ether lipid metabolism	123	2.2125e-23	5.31e-22	ko00565
Starch and sucrose metabolism	117	1.12396e-11	1.12396e-10	ko00500
Flavonoid biosynthesis	114	2.2277e-15	2.97026e-14	ko00941
Phenylalanine metabolism	97	1.44534e-18	2.47772e-17	ko00360
Flavone and flavonol biosynthesis	87	1.47861e-15	2.21791e-14	ko00944
Pentose and glucuronate interconversions	73	5.83427e-15	7.00112e-14	ko00040
Spliceosome	67	0.999802	1	ko03040
Cyanoamino acid metabolism	57	1.24658e-09	1.06849e-08	ko00460
Stilbenoid, diarylheptanoid and gingerol biosynthesis	56	1.87526e-10	1.73101e-09	ko00945
Amino sugar and nucleotide sugar metabolism	56	0.00219231	0.0097436	ko00520
RNA transport	56	0.999996	1	ko03013
Cutin, suberine and wax biosynthesis	52	2.28635e-06	1.52423e-05	ko00073
Protein processing in endoplasmic reticulum	52	0.950557	1	ko04141
Phagosome	49	0.00156962	0.00753419	ko04145
Zeatin biosynthesis	48	8.68097e-05	0.000520858	ko00908
Ascorbate and aldarate metabolism	47	1.76946e-06	1.24903e-05	ko00053
Glycolysis / Gluconeogenesis	47	0.0178326	0.0629387	ko00010
Limonene and pinene degradation	40	6.19186e-07	4.64389e-06	ko00903
Carotenoid biosynthesis	38	0.000480184	0.00240092	ko00906
Pyrimidine metabolism	37	0.999821	1	ko00240
Other glycan degradation	36	4.20762e-07	3.36609e-06	ko00511
alpha-Linolenic acid metabolism	36	0.00165896	0.00765672	ko00592
Tyrosine metabolism	35	0.00011369	0.000620127	ko00350
Glutathione metabolism	35	0.00424155	0.0181781	ko00480
Cysteine and methionine metabolism	34	0.00467974	0.0193644	ko00270
Alanine, aspartate and glutamate metabolism	34	0.00689469	0.0258551	ko00250
Oxidative phosphorylation	34	0.676403	1	ko00190
Purine metabolism	33	0.999987	1	ko00230
Carbon fixation in photosynthetic organisms	30	0.0177281	0.0629387	ko00710
ABC transporters	30	0.447772	0.867121	ko02010
Nitrogen metabolism	29	0.000128307	0.000669429	ko00910
mRNA surveillance pathway	26	0.999955	1	ko03015
Diterpenoid biosynthesis	26	9.30354e-05	0.000531631	ko00904
Peroxisome	25	0.426762	0.853524	ko04146
Glyoxylate and dicarboxylate metabolism	24	0.0230273	0.0767577	ko00630
Pentose phosphate pathway	23	0.025562	0.0829036	ko00030
Pyruvate metabolism	23	0.579393	1	ko00620
Glycosylphosphatidylinositol(GPI)-anchor biosynthesis	22	0.100989	0.252472	ko00563
Fatty acid metabolism	20	0.088262	0.230249	ko00071
Citrate cycle (TCA cycle)	20	0.426077	0.853524	ko00020
RNA polymerase	20	0.996834	1	ko03020
Ribosome biogenesis in eukaryotes	20	0.999997	1	ko03008
Tryptophan metabolism	19	0.0186043	0.0637863	ko00380
Porphyrin and chlorophyll metabolism	19	0.185287	0.412943	ko00860
RNA degradation	19	0.999997	1	ko03018
Propanoate metabolism	17	0.130913	0.320604	ko00640
Arginine and proline metabolism	17	0.703596	1	ko00330
Fructose and mannose metabolism	16	0.462465	0.867121	ko00051
Galactose metabolism	16	0.795718	1	ko00052
Sesquiterpenoid and triterpenoid biosynthesis	15	2.41135e-05	0.000152296	ko00909
Biosynthesis of unsaturated fatty acids	15	0.185824	0.412943	ko01040
Glycerolipid metabolism	15	0.454011	0.867121	ko00561
Selenocompound metabolism	14	0.00659457	0.0255274	ko00450
Linoleic acid metabolism	14	0.0346335	0.106565	ko00591
Inositol phosphate metabolism	14	0.567767	1	ko00562
Terpenoid backbone biosynthesis	14	0.872817	1	ko00900
Isoquinoline alkaloid biosynthesis	13	0.00560162	0.0224065	ko00950
Glycine, serine and threonine metabolism	13	0.622789	1	ko00260
Ubiquinone and other terpenoid-quinone biosynthesis	13	0.678291	1	ko00130
Phosphatidylinositol signaling system	13	0.784326	1	ko04070
Circadian rhythm - plant	13	0.876993	1	ko04712
Fatty acid elongation	12	0.0481834	0.138092	ko00062
Phenylalanine, tyrosine and tryptophan biosynthesis	12	0.765851	1	ko00400
Sulfur metabolism	11	0.0955741	0.244019	ko00920
Fatty acid biosynthesis	11	0.140342	0.330217	ko00061
Isoflavonoid biosynthesis	11	0.140342	0.330217	ko00943
beta-Alanine metabolism	11	0.411959	0.852328	ko00410
Brassinosteroid biosynthesis	10	0.398416	0.83877	ko00905
Ubiquitin mediated proteolysis	10	1	1	ko04120
Tropane, piperidine and pyridine alkaloid biosynthesis	9	0.0571589	0.154776	ko00960
Sphingolipid metabolism	9	0.801515	1	ko00600
Valine, leucine and isoleucine degradation	8	0.892413	1	ko00280
Betalain biosynthesis	7	0.0483323	0.138092	ko00965
Monoterpenoid biosynthesis	7	0.0483323	0.138092	ko00902
Indole alkaloid biosynthesis	7	0.0580411	0.154776	ko00901
Arachidonic acid metabolism	7	0.156794	0.361832	ko00590
Steroid biosynthesis	7	0.88559	1	ko00100
Regulation of autophagy	7	0.998449	1	ko04140
Glycosphingolipid biosynthesis - globo series	6	0.200602	0.437678	ko00603
Butanoate metabolism	6	0.848872	1	ko00650
SNARE interactions in vesicular transport	6	0.895619	1	ko04130
Protein export	6	0.966657	1	ko03060
Base excision repair	6	0.999358	1	ko03410
Nucleotide excision repair	6	0.999997	1	ko03420
Glucosinolate biosynthesis	5	0.0509879	0.142292	ko00966
Riboflavin metabolism	5	0.71262	1	ko00740
Lysine degradation	5	0.921641	1	ko00310
Photosynthesis	5	0.970453	1	ko00195
DNA replication	5	0.999906	1	ko03030
Vitamin B6 metabolism	4	0.722801	1	ko00750
Histidine metabolism	4	0.812479	1	ko00340
Anthocyanin biosynthesis	3	0.0342969	0.106565	ko00942
One carbon pool by folate	3	0.738583	1	ko00670
Thiamine metabolism	3	0.816979	1	ko00730
Natural killer cell mediated cytotoxicity	3	0.980666	1	ko04650
Mismatch repair	3	0.999846	1	ko03430
Basal transcription factors	3	0.999976	1	ko03022
Homologous recombination	3	1	1	ko03440
Other types of O-glycan biosynthesis	2	0.847369	1	ko00514
Folate biosynthesis	2	0.86333	1	ko00790
Non-homologous end-joining	2	0.99114	1	ko03450
N-Glycan biosynthesis	2	0.998288	1	ko00510
Caffeine metabolism	1	0.34799	0.745693	ko00232
Biotin metabolism	1	0.680396	1	ko00780
Lysine biosynthesis	1	0.86419	1	ko00300
Photosynthesis - antenna proteins	1	0.897903	1	ko00196
Synthesis and degradation of ketone bodies	1	0.92325	1	ko00072
Sulfur relay system	1	0.933456	1	ko04122
Nicotinate and nicotinamide metabolism	1	0.9624	1	ko00760
Valine, leucine and isoleucine biosynthesis	1	0.997838	1	ko00290
Proteasome	1	0.999954	1	ko03050
Aminoacyl-tRNA biosynthesis	1	1	1	ko00970

## Sheet: Table S6
Table S6. Genes related to plant pathogen infection.
geneID(6345)	geneLength	control_rawfragments(19101792)	SNP_rawfragments(21004269)	control_FPKM	SNP_FPKM	log2 Ratio(SNP/control)	Up-Down-Regulation(SNP/control)	P-value	FDR	Nr-ID	Nr-Score	Nr-Evalue	Nr-annotation	Nt-ID	Nt-Score	Nt-Evalue	Nt-annotation	Swissprot-ID	Swissprot-Score	Swissprot-Evalue	Swissprot-annotation	COG-Protein-or-Domain	COG-Score	COG-Evalue	COG-ID	COG-Function-Description	KO_id	KEGG-Evalue	KEGG-Score	KEGG-Gene	ko_definition	GO-BiologicalProcess	GO-MolecularFunction	Go-CellularComponent	Pathway ID//Pathway
Unigene32757_All	407	0	45	0	5.2639	12.3619	Up	2.4e-13	2.77e-12	gi|301113692|ref|XP_002998616.1|	55.1	4e-07	calmodulin [Phytophthora infestans T30-4] >gi|115519|sp|P27165.2|CALM_PHYIN RecName: Full=Calmodulin; Short=CaM >gi|75326398|sp|Q71UH5.1|CALM_PYTSP RecName: Full=Calmodulin; Short=CaM >gi|9858458|gb|AAG01043.1|AF085344_1 calmodulin [Pythium splendens] >gi|169306|gb|AAA21424.1| calmodulin [Phytophthora infestans] >gi|195970351|gb|ACG60663.1| calmodulin [Phytophthora sojae] >gi|262111917|gb|EEY6996…	--	--	--	--	sp|A8CEP3|CALM_SACJA	55.1	1e-08	Calmodulin OS=Saccharina japonica GN=cam PE=2 SV=1	--	--	--	--	--	K02183	2e-07	52.8	cre:CHLREDRAFT_188144	calmodulin	GO:0050896//response to stimulus	-	-	--
Unigene32832_All	740	0	78	0	5.0183	12.293	Up	1.29e-22	2.41e-21	gi|422293714|gb|EKU21014.1|	335.1	6e-91	molecular chaperone HtpG [Nannochloropsis gaditana CCMP526]	gi|116640596|emb|CT836537.1|	89.7	4e-15	Oryza sativa (indica cultivar-group) cDNA clone:OSIGCRA207B21, full insert sequence	sp|P55737|HS902_ARATH	327	4e-90	Heat shock protein 90-2 OS=Arabidopsis thaliana GN=HSP90-2 PE=1 SV=1	SPAC926.04c	322	3e-88	COG0326	Molecular chaperone, HSP90 family	K04079	6e-92	335	pop:POPTR_550613	molecular chaperone HtpG	GO:0006952//defense response;GO:0009414//response to water deprivation;GO:0006457//protein folding;GO:0009651//response to salt stress;GO:0010286//heat acclimation;GO:0009908//flower development;GO:0050821//protein stabilization;GO:0071277//cellular response to calcium ion;GO:0048366//leaf development	GO:0005524//ATP binding;GO:0051082//unfolded protein binding	GO:0005829//cytosol;GO:0005618//cell wall;GO:0005739//mitochondrion;GO:0005730//nucleolus;GO:0005886//plasma membrane;GO:0048046//apoplast	--
CL5641.Contig2_All	355	0	22	0	2.9504	11.5267	Up	6.92e-07	4.38e-06	gi|301113692|ref|XP_002998616.1|	68.2	4e-11	calmodulin [Phytophthora infestans T30-4] >gi|115519|sp|P27165.2|CALM_PHYIN RecName: Full=Calmodulin; Short=CaM >gi|75326398|sp|Q71UH5.1|CALM_PYTSP RecName: Full=Calmodulin; Short=CaM >gi|9858458|gb|AAG01043.1|AF085344_1 calmodulin [Pythium splendens] >gi|169306|gb|AAA21424.1| calmodulin [Phytophthora infestans] >gi|195970351|gb|ACG60663.1| calmodulin [Phytophthora sojae] >gi|262111917|gb|EEY6996…	gi|195970350|gb|EU880228.1|	531	1e-148	Phytophthora sojae calmodulin (CAM1) mRNA, complete cds	sp|Q71UH5|CALM_PYTSP	217	1e-57	Calmodulin OS=Pythium splendens PE=2 SV=1	SPAC3A12.14	176	9e-45	COG5126	Ca2+-binding protein (EF-Hand superfamily)	K02183	6e-55	209	zma:100281919	calmodulin	GO:0009846//pollen germination;GO:0019722//calcium-mediated signaling;GO:0009612//response to mechanical stimulus;GO:0010099//regulation of photomorphogenesis	GO:0005509//calcium ion binding	GO:0005773//vacuole;GO:0005886//plasma membrane;GO:0005634//nucleus	--
Unigene33541_All	445	0	25	0	2.6747	11.3852	Up	9.94e-08	7.03e-07	gi|428178425|gb|EKX47300.1|	60.5	9e-09	hypothetical protein GUITHDRAFT_93934 [Guillardia theta CCMP2712]	--	--	--	--	sp|A3E4D8|CALM_PROMN	58.2	2e-09	Calmodulin OS=Prorocentrum minimum PE=2 SV=1	SPAC3A12.14	51.2	6e-07	COG5126	Ca2+-binding protein (EF-Hand superfamily)	K02183	1e-08	56.6	ota:Ot01g03840	calmodulin	-	-	-	--
CL4996.Contig2_All	242	0	13	0	2.5575	11.3205	Up	0.000233558	0.000962347	gi|255565707|ref|XP_002523843.1|	70.1	1e-11	serine-threonine protein kinase, plant-type, putative [Ricinus communis] >gi|223536931|gb|EEF38569.1| serine-threonine protein kinase, plant-type, putative [Ricinus communis]	gi|270144055|gb|BT111007.1|	103	8e-20	Picea glauca clone GQ03231_C04 mRNA sequence	sp|C0LGJ1|Y1743_ARATH	71.6	1e-13	Probable LRR receptor-like serine/threonine-protein kinase At1g74360 OS=Arabidopsis thaliana GN=At1g74360 PE=1 SV=1	--	--	--	--	--	K13420	4e-12	67.8	ath:AT5G46330	LRR receptor-like serine/threonine-protein kinase FLS2 [EC:2.7.11.1]	GO:0008152//metabolic process	GO:0016301//kinase activity	-	--
Unigene32826_All	971	2	96	0.1078	4.707	5.44838	Up	1.27e-24	2.56e-23	gi|302782772|ref|XP_002973159.1|	451.1	1e-125	hypothetical protein SELMODRAFT_271009 [Selaginella moellendorffii] >gi|300158912|gb|EFJ25533.1| hypothetical protein SELMODRAFT_271009 [Selaginella moellendorffii]	gi|75858820|gb|DQ144978.1|	81.8	1e-12	Symbiodinium sp. C3 heat shock protein 90 3 mRNA, partial cds	sp|P36182|HSP82_TOBAC	447	6e-126	Heat shock protein 82 (Fragment) OS=Nicotiana tabacum GN=HSP82 PE=2 SV=1	SPAC926.04c	362	7e-100	COG0326	Molecular chaperone, HSP90 family	K04079	1e-126	451	smo:SELMODRAFT_271009	molecular chaperone HtpG	GO:0009414//response to water deprivation;GO:0006457//protein folding;GO:0009651//response to salt stress;GO:0010286//heat acclimation;GO:0009908//flower development;GO:0050821//protein stabilization;GO:0071277//cellular response to calcium ion;GO:0048366//leaf development;GO:0046685//response to arsenic-containing substance;GO:0009644//response to high light intensity;GO:0042542//response to hyd…	GO:0005524//ATP binding;GO:0051082//unfolded protein binding	GO:0005829//cytosol;GO:0005618//cell wall;GO:0005739//mitochondrion;GO:0005730//nucleolus;GO:0005886//plasma membrane;GO:0048046//apoplast	--
Unigene30331_All	314	2	55	0.3334	8.3392	4.64458	Up	1.45e-13	1.7e-12	gi|302767272|ref|XP_002967056.1|	125.2	3e-28	hypothetical protein SELMODRAFT_408419 [Selaginella moellendorffii] >gi|300165047|gb|EFJ31655.1| hypothetical protein SELMODRAFT_408419 [Selaginella moellendorffii]	gi|270137515|gb|BT104467.1|	333	6e-89	Picea glauca clone GQ02810_K24 mRNA sequence	sp|Q9FZ36|M3K2_ARATH	79.7	4e-16	Mitogen-activated protein kinase kinase kinase 2 OS=Arabidopsis thaliana GN=ANP2 PE=2 SV=1	SPAC14C4.03	50.8	6e-07	COG0515	Serine/threonine protein kinase	K11228	1e-14	75.9	ota:Ot13g01170	mitogen-activated protein kinase kinase kinase [EC:2.7.11.1]	GO:0006468//protein phosphorylation	GO:0004674//protein serine/threonine kinase activity;GO:0000166//nucleotide binding	-	--
Unigene30976_All	341	1	26	0.1535	3.63	4.56366	Up	7.22e-07	4.54e-06	gi|388503300|gb|AFK39716.1|	197.2	6e-50	unknown [Lotus japonicus]	gi|311063254|gb|GU295197.1|	77.8	7e-12	Protoperidinium crassipes heat shock protein 90 gene, partial cds	sp|P27323|HS901_ARATH	188	5e-49	Heat shock protein 90-1 OS=Arabidopsis thaliana GN=HSP90-1 PE=1 SV=3	YPL240c	172	1e-43	COG0326	Molecular chaperone, HSP90 family	K04079	1e-48	188	ath:AT5G52640	molecular chaperone HtpG	GO:0006457//protein folding;GO:0009408//response to heat;GO:0046685//response to arsenic-containing substance;GO:0009644//response to high light intensity;GO:0042542//response to hydrogen peroxide;GO:0009816//defense response to bacterium, incompatible interaction	GO:0005524//ATP binding;GO:0051082//unfolded protein binding	GO:0005829//cytosol;GO:0005618//cell wall;GO:0005886//plasma membrane	--
Unigene30469_All	267	1	22	0.1961	3.9229	4.32226	Up	8.28e-06	4.46e-05	gi|302800257|ref|XP_002981886.1|	145.2	3e-34	hypothetical protein SELMODRAFT_233855 [Selaginella moellendorffii] >gi|302808624|ref|XP_002986006.1| hypothetical protein SELMODRAFT_234936 [Selaginella moellendorffii] >gi|300146154|gb|EFJ12825.1| hypothetical protein SELMODRAFT_234936 [Selaginella moellendorffii] >gi|300150328|gb|EFJ16979.1| hypothetical protein SELMODRAFT_233855 [Selaginella moellendorffii]	gi|270134484|gb|BT101436.1|	293	5e-77	Picea glauca clone GQ01304_H16 mRNA sequence	sp|Q40374|PR1_MEDTR	131	1e-31	Pathogenesis-related protein PR-1 OS=Medicago truncatula GN=PR-1 PE=2 SV=1	YJL078c_1	65.1	3e-11	COG2340	Uncharacterized protein with SCP/PR1 domains	K13449	5e-28	120	rcu:RCOM_1381930	pathogenesis-related protein 1	-	-	GO:0005576//extracellular region	--
CL1077.Contig4_All	1154	4	80	0.1815	3.3005	4.18464	Up	3.88e-18	5.96e-17	gi|297803410|ref|XP_002869589.1|	144.4	3e-33	hypothetical protein ARALYDRAFT_492112 [Arabidopsis lyrata subsp. lyrata] >gi|297315425|gb|EFH45848.1| hypothetical protein ARALYDRAFT_492112 [Arabidopsis lyrata subsp. lyrata]	gi|270137515|gb|BT104467.1|	821	0	Picea glauca clone GQ02810_K24 mRNA sequence	sp|Q9FZ36|M3K2_ARATH	96.7	2e-20	Mitogen-activated protein kinase kinase kinase 2 OS=Arabidopsis thaliana GN=ANP2 PE=2 SV=1	YAR019c	63.2	8e-10	COG0515	Serine/threonine protein kinase	K11228	2e-20	98.2	ota:Ot13g01170	mitogen-activated protein kinase kinase kinase [EC:2.7.11.1]	GO:0046777//protein autophosphorylation	GO:0004674//protein serine/threonine kinase activity;GO:0005524//ATP binding	-	--
Unigene30707_All	435	6	70	0.7221	7.6613	3.40732	Up	6.92e-14	8.28e-13	gi|148906151|gb|ABR16233.1|	126.3	1e-28	unknown [Picea sitchensis]	gi|270146764|gb|BT113716.1|	486	1e-134	Picea glauca clone GQ03418_F13 mRNA sequence	sp|Q9LZ25|DRL30_ARATH	63.5	4e-11	Probable disease resistance protein At5g04720 OS=Arabidopsis thaliana GN=At5g04720 PE=2 SV=1	--	--	--	--	--	K13459	2e-06	49.3	rcu:RCOM_1047690	disease resistance protein RPS2	-	-	-	--
CL6134.Contig1_All	704	51	567	3.7925	38.3445	3.3378	Up	4.27e-101	3.52e-99	gi|116791726|gb|ABK26086.1|	297	1e-79	unknown [Picea sitchensis]	gi|270148175|gb|BT115127.1|	398	1e-108	Picea glauca clone GQ03609_N11 mRNA sequence	sp|P04352|CALM_CHLRE	75.5	3e-14	Calmodulin OS=Chlamydomonas reinhardtii PE=1 SV=2	SPAC3A12.14	65.1	1e-10	COG5126	Ca2+-binding protein (EF-Hand superfamily)	K02183	4e-14	76.3	cme:CME034C	calmodulin	GO:0009628//response to abiotic stimulus	-	GO:0005737//cytoplasm	--
Unigene31981_All	231	3	23	0.6799	4.7403	2.80158	Up	0.000131024	0.000566457	gi|452820589|gb|EME27629.1|	95.1	3e-19	elongation factor EF-Tu [Galdieria sulphuraria]	gi|225317458|dbj|AK329025.1|	430	1e-118	Solanum lycopersicum cDNA, clone: LEFL3081C09, HTC in root	sp|Q1ACI3|EFTU_CHAVU	82.4	6e-17	Elongation factor Tu, chloroplastic OS=Chara vulgaris GN=tufA PE=3 SV=1	ML1877	90.9	5e-19	COG0050	GTPases - translation elongation factors	K02358	9e-19	89.7	ppp:PHYPADRAFT_142425	elongation factor Tu	GO:0006414//translational elongation;GO:0006184//GTP catabolic process	GO:0003746//translation elongation factor activity;GO:0046914//transition metal ion binding;GO:0003924//GTPase activity;GO:0005525//GTP binding	GO:0005622//intracellular	--
Unigene10916_All	643	21	153	1.7098	11.3285	2.72806	Up	1.58e-23	3.07e-22	gi|2708524|gb|AAB92505.1|	128.3	9e-29	similar to resistance gene; region between conserved kinase-2 and P-Loop domains [Pinus radiata]	--	--	--	--	sp|Q40392|TMVRN_NICGU	55.1	3e-08	TMV resistance protein N OS=Nicotiana glutinosa GN=N PE=1 SV=1	--	--	--	--	--	K13457	7e-07	52	sbi:SORBI_10g028720	disease resistance protein RPM1	-	-	-	--
CL6241.Contig3_All	312	4	29	0.6712	4.4252	2.72093	Up	2.07e-05	0.000104125	gi|462397156|gb|EMJ02955.1|	143.7	8e-34	hypothetical protein PRUPE_ppa001123mg [Prunus persica]	gi|270136129|gb|BT103081.1|	297	3e-78	Picea glauca clone GQ0206_E09 mRNA sequence	sp|C0LGV0|Y5487_ARATH	136	2e-33	Probable LRR receptor-like serine/threonine-protein kinase At5g48740 OS=Arabidopsis thaliana GN=At5g48740 PE=2 SV=1	ML0016_1	55.1	3e-08	COG0515	Serine/threonine protein kinase	K04733	1e-24	109	ath:AT5G38990	interleukin-1 receptor-associated kinase 4 [EC:2.7.11.1]	GO:0010413//glucuronoxylan metabolic process;GO:0000186//activation of MAPKK activity;GO:0045492//xylan biosynthetic process	GO:0005524//ATP binding;GO:0004709//MAP kinase kinase kinase activity	GO:0005886//plasma membrane	--
Unigene30477_All	332	9	58	1.4192	8.3173	2.55104	Up	3.96e-09	3.26e-08	gi|357127449|ref|XP_003565393.1|	52.4	2e-06	PREDICTED: probable LRR receptor-like serine/threonine-protein kinase At4g26540-like, partial [Brachypodium distachyon]	--	--	--	--	sp|Q9LP24|Y1571_ARATH	95.9	5e-21	Probable leucine-rich repeat receptor-like protein kinase At1g35710 OS=Arabidopsis thaliana GN=At1g35710 PE=2 SV=1	RSp0875	47	8e-06	COG4886	Leucine-rich repeat (LRR) protein	K13420	1e-17	85.9	pop:POPTR_1075175	LRR receptor-like serine/threonine-protein kinase FLS2 [EC:2.7.11.1]	-	GO:0016772//transferase activity, transferring phosphorus-containing groups	GO:0016023//cytoplasmic membrane-bounded vesicle	--
CL1077.Contig1_All	1002	42	240	2.1944	11.4034	2.37757	Up	3.99e-31	1.01e-29	gi|186513945|ref|NP_194419.2|	121.3	2e-26	mitogen-activated protein kinase kinase kinase 16 [Arabidopsis thaliana] >gi|332659865|gb|AEE85265.1| mitogen-activated protein kinase kinase kinase 16 [Arabidopsis thaliana]	gi|270137515|gb|BT104467.1|	807	0	Picea glauca clone GQ02810_K24 mRNA sequence	sp|Q9FZ36|M3K2_ARATH	77.4	1e-14	Mitogen-activated protein kinase kinase kinase 2 OS=Arabidopsis thaliana GN=ANP2 PE=2 SV=1	--	--	--	--	--	K11228	1e-13	75.9	ota:Ot13g01170	mitogen-activated protein kinase kinase kinase [EC:2.7.11.1]	GO:0006468//protein phosphorylation	GO:0004674//protein serine/threonine kinase activity;GO:0005524//ATP binding	-	--
CL4605.Contig2_All	311	7	37	1.1783	5.6641	2.26514	Up	1.32e-05	6.89e-05	gi|242070153|ref|XP_002450353.1|	57	1e-07	hypothetical protein SORBIDRAFT_05g004115 [Sorghum bicolor] >gi|241936196|gb|EES09341.1| hypothetical protein SORBIDRAFT_05g004115 [Sorghum bicolor]	--	--	--	--	sp|C0LGF5|Y1341_ARATH	81.3	1e-16	Probable LRR receptor-like serine/threonine-protein kinase At1g34110 OS=Arabidopsis thaliana GN=At1g34110 PE=2 SV=2	alr0124_1	62.4	2e-10	COG4886	Leucine-rich repeat (LRR) protein	K13420	2e-15	78.6	rcu:RCOM_0633880	LRR receptor-like serine/threonine-protein kinase FLS2 [EC:2.7.11.1]	GO:0016310//phosphorylation	GO:0004672//protein kinase activity	GO:0016020//membrane	--
CL942.Contig2_All	818	63	319	4.0319	18.5665	2.20317	Up	2.09e-37	6.29e-36	gi|116780625|gb|ABK21745.1|	259.6	4e-68	unknown [Picea sitchensis]	gi|203353058|gb|FJ106750.1|	260	2e-66	Pinus taeda isolate 4175 anonymous locus UMN_1018_01 genomic sequence	sp|Q9SRR7|CML3_ARATH	117	6e-27	Calmodulin-like protein 3 OS=Arabidopsis thaliana GN=CML3 PE=2 SV=1	SPAC3A12.14	68.9	9e-12	COG5126	Ca2+-binding protein (EF-Hand superfamily)	K13448	7e-28	122	pop:POPTR_292686	calcium-binding protein CML	-	-	-	--
CL2405.Contig1_All	1534	48	242	1.6381	7.5107	2.19692	Up	1.19e-28	2.77e-27	gi|224286675|gb|ACN41041.1|	202.6	1e-50	unknown [Picea sitchensis]	gi|270146802|gb|BT113754.1|	97.6	3e-17	Picea glauca clone GQ03419_I03 mRNA sequence	sp|Q8VZG8|Y4885_ARATH	253	3e-67	Probable LRR receptor-like serine/threonine-protein kinase At4g08850 OS=Arabidopsis thaliana GN=At4g08850 PE=1 SV=3	alr0124_1	119	2e-26	COG4886	Leucine-rich repeat (LRR) protein	K13420	3e-67	254	sbi:SORBI_06g028760	LRR receptor-like serine/threonine-protein kinase FLS2 [EC:2.7.11.1]	-	-	-	--
CL2362.Contig1_All	764	8	37	0.5482	2.3057	2.07243	Up	3.74e-05	0.000179771	gi|148910391|gb|ABR18272.1|	179.9	3e-44	unknown [Picea sitchensis]	gi|148910390|gb|EF678524.1|	79.8	4e-12	Picea sitchensis clone WS02926_D16 unknown mRNA	sp|Q9C5K8|TIF3B_ARATH	66.6	1e-11	Protein TIFY 3B OS=Arabidopsis thaliana GN=TIFY3B PE=1 SV=1	--	--	--	--	--	K13464	1e-14	78.2	osa:4343899	jasmonate ZIM domain-containing protein	-	-	-	--
Unigene17831_All	569	24	108	2.2081	9.0366	2.03297	Up	1.94e-12	2.12e-11	gi|38636696|dbj|BAD03117.1|	145.2	5e-34	putative Receptor-like serine/threonine kinase(RFK1) [Oryza sativa Japonica Group] >gi|38636750|dbj|BAD02994.1| putative Receptor-like serine/threonine kinase(RFK1) [Oryza sativa Japonica Group] >gi|38637346|dbj|BAD03607.1| putative Receptor-like serine/threonine kinase(RFK1) [Oryza sativa Japonica Group]	gi|270142360|gb|BT109312.1|	349	2e-93	Picea glauca clone GQ03207_A05 mRNA sequence	sp|C0LGH2|Y1561_ARATH	115	1e-26	Probable LRR receptor-like serine/threonine-protein kinase At1g56130 OS=Arabidopsis thaliana GN=At1g56130 PE=1 SV=2	--	--	--	--	--	K13420	5e-06	48.9	aly:ARALYDRAFT_356368	LRR receptor-like serine/threonine-protein kinase FLS2 [EC:2.7.11.1]	-	GO:0016301//kinase activity	GO:0016023//cytoplasmic membrane-bounded vesicle;GO:0005739//mitochondrion	--
CL1077.Contig2_All	2221	718	3027	16.924	64.8868	1.93885	Up	5.4e-289	1.42e-286	gi|302755054|ref|XP_002960951.1|	315.8	1e-84	hypothetical protein SELMODRAFT_73444 [Selaginella moellendorffii] >gi|300171890|gb|EFJ38490.1| hypothetical protein SELMODRAFT_73444 [Selaginella moellendorffii]	gi|270137515|gb|BT104467.1|	1542	0	Picea glauca clone GQ02810_K24 mRNA sequence	sp|Q9FZ36|M3K2_ARATH	213	5e-55	Mitogen-activated protein kinase kinase kinase 2 OS=Arabidopsis thaliana GN=ANP2 PE=2 SV=1	YAR019c	131	4e-30	COG0515	Serine/threonine protein kinase	K11228	3e-50	198	ota:Ot13g01170	mitogen-activated protein kinase kinase kinase [EC:2.7.11.1]	GO:0046777//protein autophosphorylation	GO:0004674//protein serine/threonine kinase activity;GO:0000166//nucleotide binding	-	--
Unigene22299_All	1722	43	179	1.3073	4.9489	1.92052	Up	2.14e-18	3.34e-17	gi|148910814|gb|ABR18473.1|	199.5	1e-49	unknown [Picea sitchensis]	gi|270139992|gb|BT106944.1|	63.9	5e-07	Picea glauca clone GQ03101_A04 mRNA sequence	sp|Q38834|R13L4_ARATH	127	2e-29	Disease resistance RPP13-like protein 4 OS=Arabidopsis thaliana GN=RPP13L4 PE=2 SV=2	MA2301_1	66.2	2e-10	COG4886	Leucine-rich repeat (LRR) protein	K03013	4e-38	157	vvi:100258335	DNA-directed RNA polymerases I, II, and III subunit RPABC1	-	-	-	--
CL2769.Contig3_All	726	37	154	2.668	10.099	1.92038	Up	5.05e-16	6.93e-15	gi|167859869|gb|ACA04888.1|	144.4	1e-33	WRKY transcription factor 1 [Picea abies]	gi|270143459|gb|BT110411.1|	143	3e-31	Picea glauca clone GQ03221_F16 mRNA sequence	sp|Q93WT0|WRK31_ARATH	99.8	1e-21	Probable WRKY transcription factor 31 OS=Arabidopsis thaliana GN=WRKY31 PE=2 SV=1	--	--	--	--	--	K13424	8e-11	65.5	zma:100281160	WRKY transcription factor 33	-	-	-	--
CL6161.Contig3_All	1168	127	526	5.6923	21.4405	1.91325	Up	7.82e-51	3.13e-49	gi|224286675|gb|ACN41041.1|	108.6	2e-22	unknown [Picea sitchensis]	gi|270137671|gb|BT104623.1|	145	1e-31	Picea glauca clone GQ02812_L02 mRNA sequence	sp|Q8LPB4|PSKR1_DAUCA	171	7e-43	Phytosulfokine receptor 1 OS=Daucus carota GN=PSKR PE=1 SV=1	alr0124_1	81.6	2e-15	COG4886	Leucine-rich repeat (LRR) protein	K13415	3e-38	157	pop:POPTR_650846	protein brassinosteroid insensitive 1 [EC:2.7.10.1 2.7.11.1]	-	GO:0003824//catalytic activity	-	--
CL2405.Contig3_All	356	27	111	3.9704	14.8445	1.90257	Up	8.37e-12	8.73e-11	gi|218184060|gb|EEC66487.1|	64.3	6e-10	hypothetical protein OsI_32581 [Oryza sativa Indica Group]	gi|270137646|gb|BT104598.1|	67.9	7e-09	Picea glauca clone GQ02812_F17 mRNA sequence	sp|O49318|Y2317_ARATH	102	7e-23	Probable leucine-rich repeat receptor-like protein kinase At2g33170 OS=Arabidopsis thaliana GN=At2g33170 PE=2 SV=1	MA2301_1	58.5	3e-09	COG4886	Leucine-rich repeat (LRR) protein	K13420	1e-22	102	sbi:SORBI_06g028760	LRR receptor-like serine/threonine-protein kinase FLS2 [EC:2.7.11.1]	-	GO:0004672//protein kinase activity	-	--
Unigene8479_All	512	17	66	1.7382	6.1371	1.81996	Up	3.52e-07	2.31e-06	gi|326522112|dbj|BAK04184.1|	155.2	4e-37	predicted protein [Hordeum vulgare subsp. vulgare]	gi|270135239|gb|BT102191.1|	285	2e-74	Picea glauca clone GQ0168_E22 mRNA sequence	sp|P0C5E2|Y1839_ARATH	148	1e-36	Probable serine/threonine-protein kinase At1g18390 OS=Arabidopsis thaliana GN=At1g18390 PE=1 SV=2	--	--	--	--	--	K04733	2e-19	93.2	smo:SELMODRAFT_230241	interleukin-1 receptor-associated kinase 4 [EC:2.7.11.1]	GO:0034976//response to endoplasmic reticulum stress;GO:0002679//respiratory burst involved in defense response;GO:0010200//response to chitin;GO:0016310//phosphorylation;GO:0010583//response to cyclopentenone;GO:0009407//toxin catabolic process;GO:0006984//ER-nucleus signaling pathway	GO:0004672//protein kinase activity;GO:0000166//nucleotide binding	GO:0016023//cytoplasmic membrane-bounded vesicle;GO:0005886//plasma membrane	--
CL2769.Contig1_All	376	30	113	4.177	14.3081	1.77629	Up	4.71e-11	4.64e-10	gi|167859869|gb|ACA04888.1|	114.4	5e-25	WRKY transcription factor 1 [Picea abies]	gi|270143459|gb|BT110411.1|	141	6e-31	Picea glauca clone GQ03221_F16 mRNA sequence	sp|Q93WT0|WRK31_ARATH	70.1	3e-13	Probable WRKY transcription factor 31 OS=Arabidopsis thaliana GN=WRKY31 PE=2 SV=1	--	--	--	--	--	K13424	8e-12	66.6	pop:POPTR_577093	WRKY transcription factor 33	-	-	-	--
CL1450.Contig5_All	847	87	308	5.3773	17.3125	1.68686	Up	7.45e-26	1.57e-24	gi|116793833|gb|ABK26895.1|	347.4	1e-94	unknown [Picea sitchensis]	gi|270149106|gb|BT116058.1|	583	1e-163	Picea glauca clone GQ03711_D22 mRNA sequence	sp|Q93ZM9|TIF9_ARATH	61.2	7e-10	Protein TIFY 9 OS=Arabidopsis thaliana GN=TIFY9 PE=1 SV=1	--	--	--	--	--	K13464	3e-15	80.5	osa:4333065	jasmonate ZIM domain-containing protein	-	-	-	--
CL1321.Contig2_All	1354	33	115	1.2759	4.0436	1.66413	Up	2.27e-10	2.1e-09	gi|116780557|gb|ABK21721.1|	510.8	2e-143	unknown [Picea sitchensis]	gi|270148052|gb|BT115004.1|	728	0	Picea glauca clone GQ03607_A02 mRNA sequence	sp|Q8RWZ5|SD25_ARATH	336	2e-92	G-type lectin S-receptor-like serine/threonine-protein kinase SD2-5 OS=Arabidopsis thaliana GN=SD25 PE=1 SV=1	YAR019c	85.9	1e-16	COG0515	Serine/threonine protein kinase	K04733	2e-59	228	smo:SELMODRAFT_159261	interleukin-1 receptor-associated kinase 4 [EC:2.7.11.1]	GO:0046777//protein autophosphorylation	GO:0031625//ubiquitin protein ligase binding;GO:0004672//protein kinase activity	GO:0005886//plasma membrane;GO:0005739//mitochondrion	--
CL5322.Contig2_All	411	16	54	2.038	6.2552	1.6179	Up	2.29e-05	0.000114643	gi|74325235|gb|ABA03062.1|	111.3	4e-24	putative CC-NBS-LRR protein [Pinus monticola]	gi|270145316|gb|BT112268.1|	83.8	1e-13	Picea glauca clone GQ03312_M19 mRNA sequence	sp|O64790|DRL17_ARATH	69.7	5e-13	Probable disease resistance protein At1g61300 OS=Arabidopsis thaliana GN=At1g61300 PE=2 SV=2	--	--	--	--	--	K13459	1e-10	63.2	vvi:100254298	disease resistance protein RPS2	-	-	GO:0005829//cytosol	--
CL3108.Contig1_All	641	275	928	22.4595	68.9259	1.61772	Up	2.16e-70	1.18e-68	gi|148907661|gb|ABR16959.1|	224.6	9e-58	unknown [Picea sitchensis]	gi|270134370|gb|BT101322.1|	527	1e-147	Picea glauca clone GQ01301_K13 mRNA sequence	sp|Q9ZPX9|KIC_ARATH	123	1e-28	Calcium-binding protein KIC OS=Arabidopsis thaliana GN=KIC PE=1 SV=2	YOR257w	60.1	3e-09	COG5126	Ca2+-binding protein (EF-Hand superfamily)	K13448	1e-08	57.8	ath:AT4G14640	calcium-binding protein CML	GO:0009733//response to auxin stimulus;GO:0080167//response to karrikin	GO:0005509//calcium ion binding	-	--
Unigene8796_All	974	26	84	1.3975	4.1059	1.55485	Up	2.57e-07	1.72e-06	gi|302796193|ref|XP_002979859.1|	286.6	4e-76	hypothetical protein SELMODRAFT_111388 [Selaginella moellendorffii] >gi|300152619|gb|EFJ19261.1| hypothetical protein SELMODRAFT_111388 [Selaginella moellendorffii]	--	--	--	--	sp|Q9FE20|PBS1_ARATH	205	3e-53	Serine/threonine-protein kinase PBS1 OS=Arabidopsis thaliana GN=PBS1 PE=1 SV=1	CAC0404_1	62	1e-09	COG0515	Serine/threonine protein kinase	K13430	3e-54	210	rcu:RCOM_1078760	serine/threonine-protein kinase PBS1 [EC:2.7.11.1]	GO:0006468//protein phosphorylation	GO:0005524//ATP binding;GO:0004674//protein serine/threonine kinase activity	GO:0005886//plasma membrane	--
Unigene17307_All	888	29	93	1.7097	4.9861	1.54417	Up	6.74e-08	4.86e-07	gi|148910814|gb|ABR18473.1|	186	6e-46	unknown [Picea sitchensis]	gi|270144266|gb|BT111218.1|	67.9	2e-08	Picea glauca clone GQ03234_H14 mRNA sequence	sp|O64973|RPS5_ARATH	48.5	5e-06	Disease resistance protein RPS5 OS=Arabidopsis thaliana GN=RPS5 PE=1 SV=2	--	--	--	--	--	K13459	8e-06	49.3	rcu:RCOM_1047690	disease resistance protein RPS2	-	GO:0000166//nucleotide binding	-	--
Unigene1697_All	1078	157	501	7.6244	22.1264	1.53707	Up	3.91e-36	1.13e-34	gi|148910391|gb|ABR18272.1|	284.6	1e-75	unknown [Picea sitchensis]	gi|148910390|gb|EF678524.1|	234	2e-58	Picea sitchensis clone WS02926_D16 unknown mRNA	sp|Q9LMA8|TI10A_ARATH	59.3	4e-09	Protein TIFY 10A OS=Arabidopsis thaliana GN=TIFY10A PE=1 SV=1	--	--	--	--	--	K13464	2e-12	72	pop:POPTR_739192	jasmonate ZIM domain-containing protein	-	-	-	--
Unigene4035_All	692	49	156	3.7069	10.7327	1.53373	Up	3.07e-12	3.31e-11	gi|148906572|gb|ABR16438.1|	56.2	5e-07	unknown [Picea sitchensis]	gi|270145481|gb|BT112433.1|	79.8	3e-12	Picea glauca clone GQ03315_D04 mRNA sequence	sp|C0LGH8|Y1634_ARATH	110	1e-24	Probable LRR receptor-like serine/threonine-protein kinase At1g63430 OS=Arabidopsis thaliana GN=At1g63430 PE=1 SV=1	RSp0842	51.6	1e-06	COG4886	Leucine-rich repeat (LRR) protein	K13420	3e-22	103	aly:ARALYDRAFT_356368	LRR receptor-like serine/threonine-protein kinase FLS2 [EC:2.7.11.1]	-	GO:0016301//kinase activity	-	--
CL2407.Contig4_All	204	19	60	4.8758	14.0028	1.522	Up	1.91e-05	9.68e-05	gi|157283517|gb|ABV30785.1|	97.1	9e-20	kinase-like protein [Prunus cerasus var. caproniana]	gi|270151095|gb|BT117981.1|	246	7e-63	Picea glauca clone GQ03919_H15 mRNA sequence	sp|O64477|Y2913_ARATH	86.7	3e-18	G-type lectin S-receptor-like serine/threonine-protein kinase At2g19130 OS=Arabidopsis thaliana GN=At2g19130 PE=2 SV=1	--	--	--	--	--	K00924	8e-10	60.1	ath:AT1G14370	[EC:2.7.1.-]	GO:0048544//recognition of pollen;GO:0006468//protein phosphorylation	GO:0004715//non-membrane spanning protein tyrosine kinase activity;GO:0030246//carbohydrate binding;GO:0005524//ATP binding;GO:0004674//protein serine/threonine kinase activity	GO:0005886//plasma membrane	--
CL6439.Contig1_All	764	270	852	18.501	53.0932	1.52092	Up	2.25e-59	1.03e-57	gi|148907661|gb|ABR16959.1|	231.1	1e-59	unknown [Picea sitchensis]	gi|270134370|gb|BT101322.1|	559	1e-156	Picea glauca clone GQ01301_K13 mRNA sequence	sp|Q9ZPX9|KIC_ARATH	117	7e-27	Calcium-binding protein KIC OS=Arabidopsis thaliana GN=KIC PE=1 SV=2	SPCC1682.04	56.2	6e-08	COG5126	Ca2+-binding protein (EF-Hand superfamily)	K13448	3e-07	53.5	pop:POPTR_726467	calcium-binding protein CML	GO:0050896//response to stimulus	GO:0005509//calcium ion binding	-	--
Unigene18915_All	851	40	126	2.4607	7.0491	1.51837	Up	5.09e-10	4.56e-09	gi|225446154|ref|XP_002276768.1|	191	2e-47	PREDICTED: pathogenesis-related protein PR-1 [Vitis vinifera] >gi|297735334|emb|CBI17774.3| unnamed protein product [Vitis vinifera]	gi|270134484|gb|BT101436.1|	79.8	4e-12	Picea glauca clone GQ01304_H16 mRNA sequence	sp|Q40374|PR1_MEDTR	181	4e-46	Pathogenesis-related protein PR-1 OS=Medicago truncatula GN=PR-1 PE=2 SV=1	YJL078c_1	87.8	2e-17	COG2340	Uncharacterized protein with SCP/PR1 domains	K13449	9e-39	158	ath:AT2G14610	pathogenesis-related protein 1	-	-	-	--
CL1448.Contig2_All	679	17	52	1.3107	3.6461	1.47602	Up	0.000102262	0.000452503	gi|449461443|ref|XP_004148451.1|	134	1e-30	PREDICTED: probable WRKY transcription factor 51-like [Cucumis sativus]	gi|270146494|gb|BT113446.1|	289	2e-75	Picea glauca clone GQ03408_M17 mRNA sequence	sp|Q93WV4|WRK71_ARATH	115	2e-26	Probable WRKY transcription factor 71 OS=Arabidopsis thaliana GN=WRKY71 PE=2 SV=1	--	--	--	--	--	K13424	5e-22	102	rcu:RCOM_0664190	WRKY transcription factor 33	-	-	-	--
Unigene3683_All	628	23	68	1.9173	5.1552	1.42695	Up	1.4e-05	7.28e-05	gi|390979602|dbj|BAM21552.1|	72.8	4e-12	hypothetical protein [Cryptomeria japonica]	gi|270144121|gb|BT111073.1|	75.8	5e-11	Picea glauca clone GQ03232_F07 mRNA sequence	sp|C0LGP4|Y3475_ARATH	143	7e-35	Probable LRR receptor-like serine/threonine-protein kinase At3g47570 OS=Arabidopsis thaliana GN=At3g47570 PE=1 SV=1	MA2301_1	70.1	3e-12	COG4886	Leucine-rich repeat (LRR) protein	K13420	1e-37	154	pop:POPTR_1075175	LRR receptor-like serine/threonine-protein kinase FLS2 [EC:2.7.11.1]	GO:0008152//metabolic process	GO:0016301//kinase activity	-	--
CL1631.Contig2_All	1598	109	322	3.5709	9.5934	1.42575	Up	1.9e-21	3.39e-20	gi|296083257|emb|CBI22893.3|	424.5	2e-117	unnamed protein product [Vitis vinifera]	gi|270144975|gb|BT111927.1|	349	6e-93	Picea glauca clone GQ03307_L22 mRNA sequence	sp|Q9CAL3|CRK2_ARATH	391	7e-109	Cysteine-rich receptor-like protein kinase 2 OS=Arabidopsis thaliana GN=CRK2 PE=2 SV=1	MYPU_6850	104	4e-22	COG0515	Serine/threonine protein kinase	K13416	1e-58	226	ath:AT4G33430	brassinosteroid insensitive 1-associated receptor kinase 1 [EC:2.7.10.1 2.7.11.1]	-	-	-	--
CL3332.Contig3_All	443	36	105	4.2543	11.2844	1.40734	Up	8.41e-08	6e-07	gi|383127017|gb|AFG44138.1|	174.1	5e-43	Pinus taeda anonymous locus 0_990_01 genomic sequence	gi|270135490|gb|BT102442.1|	458	1e-126	Picea glauca clone GQ0192_N15 mRNA sequence	sp|Q8RZB5|CML10_ORYSJ	124	2e-29	Probable calcium-binding protein CML10 OS=Oryza sativa subsp. japonica GN=CML10 PE=2 SV=1	SPAC3A12.14	90.1	1e-18	COG5126	Ca2+-binding protein (EF-Hand superfamily)	K13448	1e-30	130	pop:POPTR_231748	calcium-binding protein CML	-	GO:0005509//calcium ion binding	-	--
Unigene32359_All	660	23	66	1.8244	4.7609	1.38381	Up	2.91e-05	0.000143261	gi|148909941|gb|ABR18056.1|	88.2	1e-16	unknown [Picea sitchensis]	gi|270138434|gb|BT105386.1|	147	2e-32	Picea glauca clone GQ02821_M19 mRNA sequence	sp|C0LGV1|RCH1_ARATH	171	3e-43	LRR receptor-like serine/threonine-protein kinase RCH1 OS=Arabidopsis thaliana GN=RCH1 PE=2 SV=1	alr0124_1	85.5	7e-17	COG4886	Leucine-rich repeat (LRR) protein	K13420	1e-38	157	vvi:100253808	LRR receptor-like serine/threonine-protein kinase FLS2 [EC:2.7.11.1]	GO:0010103//stomatal complex morphogenesis;GO:0048443//stamen development;GO:0002237//response to molecule of bacterial origin;GO:0007165//signal transduction	GO:0004672//protein kinase activity	GO:0016020//membrane	--
Unigene18722_All	1269	348	996	14.3563	37.3672	1.38009	Up	5.07e-60	2.34e-58	gi|302807648|ref|XP_002985518.1|	106.3	1e-21	hypothetical protein SELMODRAFT_451590 [Selaginella moellendorffii] >gi|300146724|gb|EFJ13392.1| hypothetical protein SELMODRAFT_451590 [Selaginella moellendorffii]	gi|270142475|gb|BT109427.1|	1221	0	Picea glauca clone GQ03208_E14 mRNA sequence	sp|Q9LPW3|SCRM2_ARATH	95.5	6e-20	Transcription factor SCREAM2 OS=Arabidopsis thaliana GN=SCRM2 PE=1 SV=1	--	--	--	--	--	K13422	2e-17	89	osa:4349484	transcription factor MYC2	GO:0009987//cellular process;GO:0010374//stomatal complex development	-	-	--
Unigene23692_All	1323	275	780	10.8817	28.069	1.36707	Up	9.98e-47	3.68e-45	gi|148908181|gb|ABR17206.1|	352.8	7e-96	unknown [Picea sitchensis]	gi|270148006|gb|BT114958.1|	363	3e-97	Picea glauca clone GQ03606_B23 mRNA sequence	sp|Q9FYK2|CML25_ARATH	165	6e-41	Probable calcium-binding protein CML25 OS=Arabidopsis thaliana GN=CML25 PE=2 SV=1	SPAC3A12.14	100	4e-21	COG5126	Ca2+-binding protein (EF-Hand superfamily)	K13448	2e-42	171	pop:POPTR_231748	calcium-binding protein CML	GO:0048868//pollen tube development;GO:0048767//root hair elongation;GO:0048610//cellular process involved in reproduction;GO:0009409//response to cold	GO:0016491//oxidoreductase activity	GO:0005737//cytoplasm;GO:0005634//nucleus	--
CL2362.Contig3_All	1072	64	181	3.1254	8.0385	1.36289	Up	5.91e-12	6.23e-11	gi|148910391|gb|ABR18272.1|	191.8	1e-47	unknown [Picea sitchensis]	gi|148910390|gb|EF678524.1|	79.8	5e-12	Picea sitchensis clone WS02926_D16 unknown mRNA	sp|Q9C5K8|TIF3B_ARATH	66.6	2e-11	Protein TIFY 3B OS=Arabidopsis thaliana GN=TIFY3B PE=1 SV=1	--	--	--	--	--	K13464	3e-15	80.9	osa:4343899	jasmonate ZIM domain-containing protein	-	-	-	--
Unigene15235_All	654	1068	2975	85.4908	216.572	1.341	Up	3.66e-168	5.26e-166	gi|167859869|gb|ACA04888.1|	256.5	2e-67	WRKY transcription factor 1 [Picea abies]	gi|167859868|gb|EU332986.1|	220	1e-54	Picea abies WRKY transcription factor 1 (WRKY) mRNA, partial cds	sp|Q9C519|WRKY6_ARATH	114	5e-26	WRKY transcription factor 6 OS=Arabidopsis thaliana GN=WRKY6 PE=1 SV=1	--	--	--	--	--	K13424	2e-18	90.9	pop:POPTR_577093	WRKY transcription factor 33	-	-	-	--
CL571.Contig8_All	554	22	61	2.0789	5.2422	1.33435	Up	9.36e-05	0.000416774	gi|148910025|gb|ABR18096.1|	162.2	4e-39	unknown [Picea sitchensis]	--	--	--	--	sp|O81825|DRL28_ARATH	93.6	6e-20	Probable disease resistance protein At4g27220 OS=Arabidopsis thaliana GN=At4g27220 PE=2 SV=1	--	--	--	--	--	K13460	7e-18	88.2	ath:AT1G12220	disease resistance protein RPS5	-	-	-	--
CL5789.Contig1_All	507	20	55	2.0651	5.1647	1.32247	Up	0.000232832	0.000959743	gi|3894383|gb|AAC78591.1|	53.9	1e-06	disease resistance protein [Solanum lycopersicum var. cerasiforme]	gi|270145284|gb|BT112236.1|	83.8	2e-13	Picea glauca clone GQ03312_G19 mRNA sequence	sp|Q9LP24|Y1571_ARATH	140	4e-34	Probable leucine-rich repeat receptor-like protein kinase At1g35710 OS=Arabidopsis thaliana GN=At1g35710 PE=2 SV=1	MA2301_1	73.2	2e-13	COG4886	Leucine-rich repeat (LRR) protein	K13420	7e-32	134	vvi:100253808	LRR receptor-like serine/threonine-protein kinase FLS2 [EC:2.7.11.1]	GO:0016310//phosphorylation;GO:0009814//defense response, incompatible interaction;GO:0000165//MAPK cascade	GO:0004672//protein kinase activity;GO:0000166//nucleotide binding	GO:0016020//membrane	--
Unigene19376_All	995	137	372	7.2081	17.7997	1.30416	Up	1.25e-21	2.25e-20	gi|255558292|ref|XP_002520173.1|	79.7	8e-14	serine-threonine protein kinase, plant-type, putative [Ricinus communis] >gi|223540665|gb|EEF42228.1| serine-threonine protein kinase, plant-type, putative [Ricinus communis]	gi|270135977|gb|BT102929.1|	807	0	Picea glauca clone GQ0203_H01 mRNA sequence	sp|Q9LP24|Y1571_ARATH	204	8e-53	Probable leucine-rich repeat receptor-like protein kinase At1g35710 OS=Arabidopsis thaliana GN=At1g35710 PE=2 SV=1	RSp0875	91.3	2e-18	COG4886	Leucine-rich repeat (LRR) protein	K13420	4e-49	193	sbi:SORBI_06g028760	LRR receptor-like serine/threonine-protein kinase FLS2 [EC:2.7.11.1]	-	GO:0003824//catalytic activity	-	--
CL67.Contig3_All	981	123	329	6.5639	15.9669	1.28246	Up	7.51e-19	1.2e-17	gi|225426164|ref|XP_002278894.1|	441	1e-122	PREDICTED: heat shock protein 83-like isoform 1 [Vitis vinifera]	gi|270148584|gb|BT115536.1|	983	0	Picea glauca clone GQ03701_C15 mRNA sequence	sp|P27323|HS901_ARATH	435	2e-122	Heat shock protein 90-1 OS=Arabidopsis thaliana GN=HSP90-1 PE=1 SV=3	SPAC926.04c	325	1e-88	COG0326	Molecular chaperone, HSP90 family	K04079	1e-123	441	vvi:100265661	molecular chaperone HtpG	GO:0006457//protein folding;GO:0009408//response to heat;GO:0046685//response to arsenic-containing substance;GO:0009644//response to high light intensity;GO:0042542//response to hydrogen peroxide;GO:0009816//defense response to bacterium, incompatible interaction	GO:0005524//ATP binding;GO:0051082//unfolded protein binding	GO:0005829//cytosol;GO:0005618//cell wall;GO:0005886//plasma membrane	--
Unigene10407_All	880	36	96	2.1416	5.1937	1.27807	Up	1.96e-06	1.16e-05	gi|158515839|gb|ABW69687.1|	130.6	3e-29	anthocyanin synthesis regulatory protein [Ipomoea purpurea]	gi|270142860|gb|BT109812.1|	920	0	Picea glauca clone GQ03212_K19 mRNA sequence	sp|Q9FT81|TT8_ARATH	97.1	1e-20	Transcription factor TT8 OS=Arabidopsis thaliana GN=TT8 PE=1 SV=2	--	--	--	--	--	K13422	2e-10	64.3	mtr:MTR_5g030430	transcription factor MYC2	-	-	-	--
CL4057.Contig1_All	435	50	133	6.0174	14.5564	1.27444	Up	2.19e-08	1.67e-07	gi|116785900|gb|ABK23901.1|	224.6	3e-58	unknown [Picea sitchensis] >gi|224285966|gb|ACN40695.1| unknown [Picea sitchensis]	gi|270136181|gb|BT103133.1|	293	8e-77	Picea glauca clone GQ0207_B19 mRNA sequence	sp|Q8W4L0|CML49_ARATH	47.8	2e-06	Probable calcium-binding protein CML49 OS=Arabidopsis thaliana GN=CML49 PE=2 SV=1	--	--	--	--	--	K13448	6e-06	47.8	ath:AT3G10300	calcium-binding protein CML	-	-	-	--
CL1120.Contig1_All	494	85	225	9.0078	21.6844	1.26741	Up	3.86e-13	4.41e-12	gi|224286675|gb|ACN41041.1|	105.1	4e-22	unknown [Picea sitchensis]	gi|270145481|gb|BT112433.1|	65.9	4e-08	Picea glauca clone GQ03315_D04 mRNA sequence	sp|C0LGU7|Y5458_ARATH	55.1	2e-08	Probable LRR receptor-like serine/threonine-protein kinase At5g45840 OS=Arabidopsis thaliana GN=At5g45840 PE=2 SV=1	--	--	--	--	--	K13420	3e-09	59.3	sbi:SORBI_06g028760	LRR receptor-like serine/threonine-protein kinase FLS2 [EC:2.7.11.1]	-	-	-	--
CL2045.Contig2_All	1622	90	233	2.9048	6.8391	1.23537	Up	4.4e-13	5.01e-12	gi|283132365|dbj|BAI63588.1|	263.1	1e-68	leucine rich repeat protein [Lotus japonicus]	gi|270140645|gb|BT107597.1|	357	2e-95	Picea glauca clone GQ03110_A04 mRNA sequence	sp|A8JAM0|CC135_CHLRE	87.8	2e-17	Coiled-coil domain-containing protein lobo homolog (Fragment) OS=Chlamydomonas reinhardtii GN=FAP50 PE=2 SV=1	MA2301_1	137	7e-32	COG4886	Leucine-rich repeat (LRR) protein	K13420	6e-17	87.4	aly:ARALYDRAFT_356368	LRR receptor-like serine/threonine-protein kinase FLS2 [EC:2.7.11.1]	GO:0042023//DNA endoreduplication	GO:0016787//hydrolase activity	-	--
Unigene30653_All	1113	570	1470	26.8105	62.8803	1.22981	Up	9.84e-74	5.67e-72	gi|33326375|gb|AAQ08597.1|	513.1	3e-144	heat shock protein [Hevea brasiliensis]	gi|357166293|ref|XM_003580615.1|	297	1e-77	PREDICTED: Brachypodium distachyon heat shock protein 83-like (LOC100824256), mRNA	sp|P27323|HS901_ARATH	506	7e-144	Heat shock protein 90-1 OS=Arabidopsis thaliana GN=HSP90-1 PE=1 SV=3	YPL240c	353	4e-97	COG0326	Molecular chaperone, HSP90 family	K04079	7e-144	508	vvi:100257736	molecular chaperone HtpG	GO:0006457//protein folding;GO:0009408//response to heat;GO:0046685//response to arsenic-containing substance;GO:0009644//response to high light intensity;GO:0042542//response to hydrogen peroxide;GO:0009816//defense response to bacterium, incompatible interaction	GO:0005524//ATP binding;GO:0051082//unfolded protein binding	GO:0005829//cytosol;GO:0005618//cell wall;GO:0005886//plasma membrane	--
CL1631.Contig1_All	558	32	82	3.0022	6.9964	1.22059	Up	2.26e-05	0.000113375	gi|297733751|emb|CBI14998.3|	233.8	1e-60	unnamed protein product [Vitis vinifera]	gi|270144975|gb|BT111927.1|	343	1e-91	Picea glauca clone GQ03307_L22 mRNA sequence	sp|Q9CAL3|CRK2_ARATH	229	6e-61	Cysteine-rich receptor-like protein kinase 2 OS=Arabidopsis thaliana GN=CRK2 PE=2 SV=1	YAR019c	79.7	3e-15	COG0515	Serine/threonine protein kinase	K04733	1e-37	153	smo:SELMODRAFT_230241	interleukin-1 receptor-associated kinase 4 [EC:2.7.11.1]	GO:0046777//protein autophosphorylation;GO:0010193//response to ozone;GO:0034976//response to endoplasmic reticulum stress;GO:0006457//protein folding;GO:0006857//oligopeptide transport;GO:0009408//response to heat;GO:0009644//response to high light intensity;GO:0042542//response to hydrogen peroxide	GO:0004674//protein serine/threonine kinase activity;GO:0005524//ATP binding	GO:0009506//plasmodesma;GO:0005576//extracellular region;GO:0005886//plasma membrane	--
Unigene11457_All	662	123	313	9.7269	22.5102	1.21053	Up	1.38e-16	1.95e-15	gi|116780625|gb|ABK21745.1|	245	7e-64	unknown [Picea sitchensis]	gi|203353058|gb|FJ106750.1|	111	9e-22	Pinus taeda isolate 4175 anonymous locus UMN_1018_01 genomic sequence	sp|Q9SRR7|CML3_ARATH	126	9e-30	Calmodulin-like protein 3 OS=Arabidopsis thaliana GN=CML3 PE=2 SV=1	SPAC3A12.14	68.6	9e-12	COG5126	Ca2+-binding protein (EF-Hand superfamily)	K13448	3e-29	126	aly:ARALYDRAFT_896915	calcium-binding protein CML	GO:0044763;GO:0009567//double fertilization forming a zygote and endosperm;GO:0016043//cellular component organization	-	GO:0005777//peroxisome	--
Unigene15313_All	2116	608	1527	15.0423	34.357	1.19158	Up	6.74e-73	3.84e-71	gi|462407697|gb|EMJ13031.1|	171.8	4e-41	hypothetical protein PRUPE_ppa004535mg [Prunus persica]	gi|270147053|gb|BT114005.1|	773	0	Picea glauca clone GQ03506_F12 mRNA sequence	sp|Q9SA80|WRK14_ARATH	154	3e-37	Probable WRKY transcription factor 14 OS=Arabidopsis thaliana GN=WRKY14 PE=2 SV=2	--	--	--	--	--	K13425	9e-32	137	pop:POPTR_755334	WRKY transcription factor 22	-	-	-	--
CL1120.Contig2_All	636	52	129	4.2803	9.6566	1.1738	Up	2.39e-07	1.6e-06	gi|148909941|gb|ABR18056.1|	52	8e-06	unknown [Picea sitchensis]	gi|270145481|gb|BT112433.1|	65.9	5e-08	Picea glauca clone GQ03315_D04 mRNA sequence	sp|C0LGU7|Y5458_ARATH	94	6e-20	Probable LRR receptor-like serine/threonine-protein kinase At5g45840 OS=Arabidopsis thaliana GN=At5g45840 PE=2 SV=1	--	--	--	--	--	K13420	7e-24	108	sbi:SORBI_06g028760	LRR receptor-like serine/threonine-protein kinase FLS2 [EC:2.7.11.1]	-	-	-	--
Unigene18624_All	972	95	235	5.1166	11.5105	1.16969	Up	3.24e-12	3.49e-11	gi|167859869|gb|ACA04888.1|	201.4	1e-50	WRKY transcription factor 1 [Picea abies]	gi|167859868|gb|EU332986.1|	244	1e-61	Picea abies WRKY transcription factor 1 (WRKY) mRNA, partial cds	sp|Q9C519|WRKY6_ARATH	157	1e-38	WRKY transcription factor 6 OS=Arabidopsis thaliana GN=WRKY6 PE=1 SV=1	--	--	--	--	--	K13424	7e-17	86.3	rcu:RCOM_0664190	WRKY transcription factor 33	-	-	-	--
CL5335.Contig1_All	973	51	123	2.744	6.0185	1.13312	Up	9.42e-07	5.84e-06	gi|224284243|gb|ACN39857.1|	337.8	1e-91	unknown [Picea sitchensis]	gi|270147679|gb|BT114631.1|	567	1e-159	Picea glauca clone GQ03518_C06 mRNA sequence	sp|Q9FNE1|CRK42_ARATH	188	5e-48	Cysteine-rich receptor-like protein kinase 42 OS=Arabidopsis thaliana GN=CRK42 PE=2 SV=1	lin1934_1	66.6	6e-11	COG0515	Serine/threonine protein kinase	K04733	3e-32	137	smo:SELMODRAFT_159261	interleukin-1 receptor-associated kinase 4 [EC:2.7.11.1]	GO:0016310//phosphorylation	GO:0004672//protein kinase activity;GO:0000166//nucleotide binding	-	--
CL991.Contig1_All	1815	59	142	1.7018	3.7248	1.1301	Up	1.44e-07	9.93e-07	gi|470131412|ref|XP_004301589.1|	433.7	5e-120	PREDICTED: ferric reduction oxidase 7, chloroplastic-like [Fragaria vesca subsp. vesca]	gi|270144435|gb|BT111387.1|	1417	0	Picea glauca clone GQ03236_O10 mRNA sequence	sp|Q8RWS6|FRO6_ARATH	415	5e-116	Ferric reduction oxidase 6 OS=Arabidopsis thaliana GN=FRO6 PE=2 SV=1	--	--	--	--	--	K13447	1e-25	116	osa:4339397	respiratory burst oxidase [EC:1.6.3.- 1.11.1.-]	GO:0009767//photosynthetic electron transport chain;GO:0009416//response to light stimulus	GO:0016174//NAD(P)H oxidase activity;GO:0000293//ferric-chelate reductase activity;GO:0005506//iron ion binding	GO:0005886//plasma membrane;GO:0016021//integral to membrane;GO:0009507//chloroplast	--
Unigene16937_All	1970	82	197	2.1791	4.7609	1.1275	Up	5.96e-10	5.3e-09	gi|302761328|ref|XP_002964086.1|	435.3	1e-120	hypothetical protein SELMODRAFT_81021 [Selaginella moellendorffii] >gi|300167815|gb|EFJ34419.1| hypothetical protein SELMODRAFT_81021 [Selaginella moellendorffii]	--	--	--	--	sp|Q8RWZ5|SD25_ARATH	396	2e-110	G-type lectin S-receptor-like serine/threonine-protein kinase SD2-5 OS=Arabidopsis thaliana GN=SD25 PE=1 SV=1	BS_yloP_1	87.4	8e-17	COG0515	Serine/threonine protein kinase	K13417	1e-62	239	aly:ARALYDRAFT_899604	somatic embryogenesis receptor kinase 4 [EC:2.7.10.1 2.7.11.1]	GO:0046777//protein autophosphorylation	GO:0004672//protein kinase activity;GO:0031625//ubiquitin protein ligase binding	GO:0005886//plasma membrane	--
CL3209.Contig2_All	1363	116	278	4.4554	9.7105	1.12399	Up	2.09e-13	2.43e-12	gi|462402082|gb|EMJ07639.1|	555.4	8e-157	hypothetical protein PRUPE_ppa000952mg [Prunus persica]	gi|270151072|gb|BT117958.1|	805	0	Picea glauca clone GQ03918_G12 mRNA sequence	sp|C0LGD7|Y1684_ARATH	540	7e-154	Probable LRR receptor-like serine/threonine-protein kinase At1g06840 OS=Arabidopsis thaliana GN=At1g06840 PE=1 SV=2	BS_yloP_1	89.4	1e-17	COG0515	Serine/threonine protein kinase	K04733	1e-67	255	smo:SELMODRAFT_159261	interleukin-1 receptor-associated kinase 4 [EC:2.7.11.1]	GO:0006468//protein phosphorylation;GO:0000165//MAPK cascade	GO:0004674//protein serine/threonine kinase activity;GO:0016491//oxidoreductase activity;GO:0000166//nucleotide binding	GO:0016023//cytoplasmic membrane-bounded vesicle;GO:0016020//membrane	--
CL6270.Contig1_All	2350	472	1127	10.5148	22.8322	1.11865	Up	3.07e-49	1.19e-47	gi|449457277|ref|XP_004146375.1|	296.2	1e-78	PREDICTED: leucine-rich repeat-containing protein 40-like [Cucumis sativus] >gi|449530051|ref|XP_004172010.1| PREDICTED: leucine-rich repeat-containing protein 40-like [Cucumis sativus]	gi|270134711|gb|BT101663.1|	517	1e-143	Picea glauca clone GQ01310_A16 mRNA sequence	sp|Q9FL28|FLS2_ARATH	98.6	1e-20	LRR receptor-like serine/threonine-protein kinase FLS2 OS=Arabidopsis thaliana GN=FLS2 PE=1 SV=1	MA2301_1	134	7e-31	COG4886	Leucine-rich repeat (LRR) protein	K13420	2e-20	99.8	sbi:SORBI_06g028760	LRR receptor-like serine/threonine-protein kinase FLS2 [EC:2.7.11.1]	GO:0042023//DNA endoreduplication	-	-	--
CL2741.Contig1_All	1772	367	865	10.8425	23.2405	1.09994	Up	3.28e-37	9.82e-36	gi|255545176|ref|XP_002513649.1|	921.8	0	heat shock protein, putative [Ricinus communis] >gi|223547557|gb|EEF49052.1| heat shock protein, putative [Ricinus communis]	gi|147789389|emb|AM423851.2|	571	1e-160	Vitis vinifera contig VV78X192584.4, whole genome shotgun sequence	sp|P27323|HS901_ARATH	920	0	Heat shock protein 90-1 OS=Arabidopsis thaliana GN=HSP90-1 PE=1 SV=3	SPAC926.04c	676	0	COG0326	Molecular chaperone, HSP90 family	K04079	0	921	rcu:RCOM_1582180	molecular chaperone HtpG	GO:0006457//protein folding;GO:0009408//response to heat;GO:0046685//response to arsenic-containing substance;GO:0009644//response to high light intensity;GO:0042542//response to hydrogen peroxide;GO:0009816//defense response to bacterium, incompatible interaction	GO:0005524//ATP binding;GO:0051082//unfolded protein binding	GO:0005829//cytosol;GO:0005618//cell wall;GO:0005886//plasma membrane	--
CL1450.Contig3_All	1485	187	440	6.5924	14.1065	1.09748	Up	1.21e-19	1.99e-18	gi|116793035|gb|ABK26593.1|	357.8	2e-97	unknown [Picea sitchensis]	gi|270149106|gb|BT116058.1|	398	1e-108	Picea glauca clone GQ03711_D22 mRNA sequence	sp|Q93ZM9|TIF9_ARATH	70.5	2e-12	Protein TIFY 9 OS=Arabidopsis thaliana GN=TIFY9 PE=1 SV=1	--	--	--	--	--	K13464	1e-13	76.3	zma:100282471	jasmonate ZIM domain-containing protein	-	-	-	--
CL4503.Contig2_All	1868	358	842	10.033	21.4599	1.09689	Up	4.13e-36	1.2e-34	gi|359486141|ref|XP_002266723.2|	679.9	0	PREDICTED: ferric reduction oxidase 7, chloroplastic-like [Vitis vinifera]	gi|270144435|gb|BT111387.1|	1219	0	Picea glauca clone GQ03236_O10 mRNA sequence	sp|Q8RWS6|FRO6_ARATH	640	0	Ferric reduction oxidase 6 OS=Arabidopsis thaliana GN=FRO6 PE=2 SV=1	--	--	--	--	--	K13447	9e-25	113	sbi:SORBI_09g026320	respiratory burst oxidase [EC:1.6.3.- 1.11.1.-]	GO:0009767//photosynthetic electron transport chain;GO:0009416//response to light stimulus	GO:0000293//ferric-chelate reductase activity	GO:0005886//plasma membrane;GO:0009507//chloroplast	--
Unigene14074_All	935	1736	4059	97.1995	206.681	1.08838	Up	3.64e-165	5.09e-163	gi|351726624|ref|NP_001236109.1|	277.3	2e-73	uncharacterized protein LOC100527439 [Glycine max]	gi|449448849|ref|XM_004142130.1|	280	3e-72	PREDICTED: Cucumis sativus calmodulin-related protein-like (LOC101219809), mRNA >gi|449525911|ref|XM_004169912.1| PREDICTED: Cucumis sativus calmodulin-related protein-like (LOC101227241), mRNA	sp|P17928|CALM_MEDSA	275	3e-74	Calmodulin OS=Medicago sativa GN=CAL1 PE=2 SV=2	SPAC3A12.14	214	1e-55	COG5126	Ca2+-binding protein (EF-Hand superfamily)	K02183	8e-74	275	mtr:MTR_5g088320	calmodulin	GO:0010099//regulation of photomorphogenesis;GO:0006084//acetyl-CoA metabolic process;GO:0005513//detection of calcium ion;GO:0009846//pollen germination;GO:0019722//calcium-mediated signaling;GO:0009612//response to mechanical stimulus	GO:0005509//calcium ion binding;GO:0005515//protein binding	GO:0005829//cytosol;GO:0005773//vacuole;GO:0005634//nucleus;GO:0005886//plasma membrane	--
CL4612.Contig2_All	600	42	98	3.6646	7.7762	1.08541	Up	2.41e-05	0.000120256	gi|148907267|gb|ABR16772.1|	188	8e-47	unknown [Picea sitchensis]	gi|270133690|gb|BT100642.1|	385	1e-104	Picea glauca clone GQ0034_G11 mRNA sequence	sp|Q10LX4|CML27_ORYSJ	101	4e-22	Probable calcium-binding protein CML27 OS=Oryza sativa subsp. japonica GN=CML27 PE=2 SV=1	--	--	--	--	--	K13448	5e-23	105	rcu:RCOM_0126810	calcium-binding protein CML	GO:0046686//response to cadmium ion;GO:0010091//trichome branching	GO:0005515//protein binding;GO:0005509//calcium ion binding	-	--
Unigene12644_All	1360	235	541	9.046	18.9387	1.06599	Up	8.92e-23	1.68e-21	gi|22325727|ref|NP_179283.2|	124.4	4e-27	transcription factor ABORTED MICROSPORES [Arabidopsis thaliana] >gi|218563495|sp|Q9ZVX2.2|AMS_ARATH RecName: Full=Transcription factor ABORTED MICROSPORES; AltName: Full=Basic helix-loop-helix protein 21; Short=AtbHLH21; Short=bHLH 21; AltName: Full=Transcription factor EN 48; AltName: Full=bHLH transcription factor bHLH021 >gi|330251459|gb|AEC06553.1| transcription factor ABORTED MICROSPORES [Ar…	gi|270136128|gb|BT103080.1|	325	7e-86	Picea glauca clone GQ0206_D24 mRNA sequence	sp|Q9ZVX2|AMS_ARATH	124	1e-28	Transcription factor ABORTED MICROSPORES OS=Arabidopsis thaliana GN=AMS PE=1 SV=2	--	--	--	--	--	K13422	2e-18	92	rcu:RCOM_0864470	transcription factor MYC2	GO:0048658//tapetal layer development;GO:0009555//pollen development	-	-	--
Unigene4937_All	1392	135	308	5.0772	10.5343	1.05299	Up	2.25e-13	2.61e-12	gi|148910814|gb|ABR18473.1|	374	3e-102	unknown [Picea sitchensis]	gi|270144266|gb|BT111218.1|	194	2e-46	Picea glauca clone GQ03234_H14 mRNA sequence	sp|Q8L3R3|RFL1_ARATH	219	2e-57	Disease resistance protein RFL1 OS=Arabidopsis thaliana GN=RFL1 PE=3 SV=2	ECU09g0200	62	2e-09	COG4886	Leucine-rich repeat (LRR) protein	K13459	3e-53	207	rcu:RCOM_1047690	disease resistance protein RPS2	-	-	-	--
Unigene20958_All	1064	385	875	18.9428	39.1524	1.04745	Up	7.01e-35	1.96e-33	gi|167859869|gb|ACA04888.1|	254.2	2e-66	WRKY transcription factor 1 [Picea abies]	gi|167859868|gb|EU332986.1|	244	2e-61	Picea abies WRKY transcription factor 1 (WRKY) mRNA, partial cds	sp|Q9C519|WRKY6_ARATH	157	1e-38	WRKY transcription factor 6 OS=Arabidopsis thaliana GN=WRKY6 PE=1 SV=1	--	--	--	--	--	K13424	2e-18	91.3	pop:POPTR_577093	WRKY transcription factor 33	GO:0042221//response to chemical stimulus;GO:0050794//regulation of cellular process;GO:0007154//cell communication;GO:0044237//cellular metabolic process;GO:0051716//cellular response to stimulus;GO:0006950//response to stress	GO:0003677//DNA binding	-	--
CL538.Contig2_All	1170	125	283	5.5931	11.5158	1.04189	Up	3.23e-12	3.47e-11	gi|294461132|gb|ADE76131.1|	382.5	7e-105	unknown [Picea sitchensis]	gi|270138261|gb|BT105213.1|	670	0	Picea glauca clone GQ02819_L23 mRNA sequence	sp|Q9LT96|Y5977_ARATH	266	2e-71	Probable leucine-rich repeat receptor-like protein kinase At5g49770 OS=Arabidopsis thaliana GN=At5g49770 PE=2 SV=1	YAR019c	82.8	1e-15	COG0515	Serine/threonine protein kinase	K04733	1e-54	212	smo:SELMODRAFT_159261	interleukin-1 receptor-associated kinase 4 [EC:2.7.11.1]	GO:0030003//cellular cation homeostasis;GO:0016310//phosphorylation;GO:0070838//divalent metal ion transport;GO:0006569//tryptophan catabolic process;GO:0009684//indoleacetic acid biosynthetic process;GO:0044242//cellular lipid catabolic process	GO:0004672//protein kinase activity	GO:0005773//vacuole;GO:0005886//plasma membrane	--
Unigene5015_All	2738	214	482	4.0917	8.3812	1.03446	Up	1.47e-19	2.43e-18	gi|147860573|emb|CAN79719.1|	572.8	1e-161	hypothetical protein VITISV_012742 [Vitis vinifera]	gi|270134278|gb|BT101230.1|	1637	0	Picea glauca clone GQ0074_I21 mRNA sequence	sp|Q9FKG6|PUB52_ARATH	502	5e-142	U-box domain-containing protein 52 OS=Arabidopsis thaliana GN=PUB52 PE=2 SV=1	SPy1625_1	93.6	2e-18	COG0515	Serine/threonine protein kinase	K04733	4e-49	195	aly:ARALYDRAFT_916421	interleukin-1 receptor-associated kinase 4 [EC:2.7.11.1]	GO:0048868//pollen tube development;GO:0050896//response to stimulus;GO:0010053//root epidermal cell differentiation;GO:0048610//cellular process involved in reproduction;GO:0016043//cellular component organization	GO:0016772//transferase activity, transferring phosphorus-containing groups	GO:0044464//cell part	--
Unigene24475_All	1654	384	859	12.1541	24.7258	1.02457	Up	4.07e-33	1.08e-31	gi|224077478|ref|XP_002305263.1|	847.8	0	predicted protein [Populus trichocarpa] >gi|222848227|gb|EEE85774.1| predicted protein [Populus trichocarpa]	gi|147789389|emb|AM423851.2|	547	1e-152	Vitis vinifera contig VV78X192584.4, whole genome shotgun sequence	sp|P27323|HS901_ARATH	845	0	Heat shock protein 90-1 OS=Arabidopsis thaliana GN=HSP90-1 PE=1 SV=3	SPAC926.04c	624	1e-178	COG0326	Molecular chaperone, HSP90 family	K04079	0	847	pop:POPTR_556104	molecular chaperone HtpG	GO:0006457//protein folding;GO:0009408//response to heat;GO:0046685//response to arsenic-containing substance;GO:0009644//response to high light intensity;GO:0042542//response to hydrogen peroxide;GO:0009816//defense response to bacterium, incompatible interaction	GO:0005524//ATP binding;GO:0051082//unfolded protein binding	GO:0005829//cytosol;GO:0005618//cell wall;GO:0005886//plasma membrane	--
Unigene19398_All	3712	1469	3273	20.7176	41.9788	1.0188	Up	3.97e-120	3.97e-118	gi|359480969|ref|XP_002264658.2|	962.6	0	PREDICTED: probable leucine-rich repeat receptor-like protein kinase At5g49770 [Vitis vinifera]	gi|203361682|gb|FJ115374.1|	190	7e-45	Pinus taeda isolate 4120 anonymous locus UMN_5144_01 genomic sequence	sp|Q9LT96|Y5977_ARATH	773	0	Probable leucine-rich repeat receptor-like protein kinase At5g49770 OS=Arabidopsis thaliana GN=At5g49770 PE=2 SV=1	YAR019c	100	2e-20	COG0515	Serine/threonine protein kinase	K13420	3e-75	282	ath:AT5G46330	LRR receptor-like serine/threonine-protein kinase FLS2 [EC:2.7.11.1]	GO:0045492//xylan biosynthetic process;GO:0007169//transmembrane receptor protein tyrosine kinase signaling pathway;GO:0006468//protein phosphorylation;GO:0010413//glucuronoxylan metabolic process	GO:0004674//protein serine/threonine kinase activity;GO:0005524//ATP binding	GO:0005576//extracellular region	--
Unigene19997_All	1066	61	135	2.9957	6.0293	1.0091	Up	2.9e-06	1.68e-05	gi|223702432|gb|ACN21647.1|	124.4	3e-27	putative basic helix-loop-helix protein BHLH21 [Lotus japonicus]	gi|270135784|gb|BT102736.1|	375	1e-101	Picea glauca clone GQ02013_D04 mRNA sequence	sp|Q0V7X4|FIT_ARATH	118	7e-27	Transcription factor FER-LIKE IRON DEFICIENCY-INDUCED TRANSCRIPTION FACTOR OS=Arabidopsis thaliana GN=FIT PE=1 SV=1	--	--	--	--	--	K13422	4e-15	80.5	mtr:MTR_5g030430	transcription factor MYC2	GO:0071281//cellular response to iron ion;GO:0071369//cellular response to ethylene stimulus;GO:0006355//regulation of transcription, DNA-dependent;GO:0034756//regulation of iron ion transport;GO:0071732//cellular response to nitric oxide	GO:0005515//protein binding	-	--
Unigene21736_All	535	83	183	8.1218	16.2851	1.00368	Up	5.71e-08	4.16e-07	gi|148907267|gb|ABR16772.1|	126.7	1e-28	unknown [Picea sitchensis]	gi|270133690|gb|BT100642.1|	153	2e-34	Picea glauca clone GQ0034_G11 mRNA sequence	sp|Q10LX4|CML27_ORYSJ	97.4	4e-21	Probable calcium-binding protein CML27 OS=Oryza sativa subsp. japonica GN=CML27 PE=2 SV=1	SPAC3A12.14	57	2e-08	COG5126	Ca2+-binding protein (EF-Hand superfamily)	K13448	2e-20	96.3	sbi:SORBI_02g043140	calcium-binding protein CML	-	GO:0046872//metal ion binding	-	--
Unigene12222_All	913	115	63	6.5941	3.2852	-1.00519	Down	5.49e-06	3.04e-05	gi|255545010|ref|XP_002513566.1|	281.6	1e-74	receptor serine/threonine kinase, putative [Ricinus communis] >gi|223547474|gb|EEF48969.1| receptor serine/threonine kinase, putative [Ricinus communis]	gi|270148475|gb|BT115427.1|	458	1e-126	Picea glauca clone GQ03616_G14 mRNA sequence	sp|Q3ECH2|Y1670_ARATH	240	7e-64	Probable receptor-like protein kinase At1g67000 OS=Arabidopsis thaliana GN=At1g67000 PE=2 SV=2	CAC1728_1	78.6	1e-14	COG0515	Serine/threonine protein kinase	K13417	9e-40	162	ath:AT2G13790	somatic embryogenesis receptor kinase 4 [EC:2.7.10.1 2.7.11.1]	-	GO:0005488//binding;GO:0004672//protein kinase activity	-	--
CL1231.Contig2_All	2071	6427	3516	162.463	80.8279	-1.00719	Down	5.1e-255	1.19e-252	gi|359474751|ref|XP_002269362.2|	238.8	2e-61	PREDICTED: receptor-like serine/threonine-protein kinase NCRK-like [Vitis vinifera]	gi|270142907|gb|BT109859.1|	131	3e-27	Picea glauca clone GQ03213_B14 mRNA sequence	sp|Q9SX31|PERK9_ARATH	201	2e-51	Proline-rich receptor-like protein kinase PERK9 OS=Arabidopsis thaliana GN=PERK9 PE=2 SV=1	CAC1728_1	87	1e-16	COG0515	Serine/threonine protein kinase	K00924	8e-46	183	aly:ARALYDRAFT_486409	[EC:2.7.1.-]	-	GO:0016772//transferase activity, transferring phosphorus-containing groups	-	--
Unigene13972_All	1457	1621	877	58.2438	28.6571	-1.02321	Down	1.85e-67	9.57e-66	gi|225441038|ref|XP_002283857.1|	294.7	2e-78	PREDICTED: probable leucine-rich repeat receptor-like protein kinase At1g68400 isoform 1 [Vitis vinifera]	gi|294461902|gb|BT123171.1|	1237	0	Picea sitchensis clone WS0467_J09 unknown mRNA	sp|Q9M9C5|Y1680_ARATH	182	6e-46	Probable leucine-rich repeat receptor-like protein kinase At1g68400 OS=Arabidopsis thaliana GN=At1g68400 PE=2 SV=1	alr0124_1	60.5	7e-09	COG4886	Leucine-rich repeat (LRR) protein	K13418	1e-19	95.9	pop:POPTR_913861	somatic embryogenesis receptor kinase 1 [EC:2.7.10.1 2.7.11.1]	GO:0009987//cellular process	GO:0016301//kinase activity	GO:0005886//plasma membrane	--
Unigene19387_All	3723	569	301	8.001	3.8492	-1.05562	Down	5.32e-26	1.13e-24	gi|462422173|gb|EMJ26436.1|	587	8e-166	hypothetical protein PRUPE_ppa001811mg [Prunus persica]	gi|270139139|gb|BT106091.1|	1955	0	Picea glauca clone GQ02902_M04 mRNA sequence	sp|Q9LV48|PERK1_ARATH	283	5e-76	Proline-rich receptor-like protein kinase PERK1 OS=Arabidopsis thaliana GN=PERK1 PE=1 SV=1	ML0897	88.6	7e-17	COG0515	Serine/threonine protein kinase	K04733	6e-77	288	smo:SELMODRAFT_159261	interleukin-1 receptor-associated kinase 4 [EC:2.7.11.1]	GO:0050896//response to stimulus	GO:0004672//protein kinase activity	-	--
CL618.Contig1_All	2432	182	95	3.9177	1.8597	-1.07494	Down	1.48e-09	1.27e-08	gi|148907027|gb|ABR16657.1|	703	0	unknown [Picea sitchensis]	gi|270152549|gb|BT119435.1|	1554	0	Picea glauca clone GQ04105_K07 mRNA sequence	sp|Q84MB2|TIF8_ARATH	97.1	4e-20	Protein TIFY 8 OS=Arabidopsis thaliana GN=TIFY8 PE=1 SV=1	--	--	--	--	--	K13464	3e-07	55.8	aly:ARALYDRAFT_479270	jasmonate ZIM domain-containing protein	-	-	-	--
CL5993.Contig1_All	2042	1792	921	45.9418	21.4732	-1.09727	Down	3.52e-83	2.3e-81	gi|148906800|gb|ABR16546.1|	804.7	0	unknown [Picea sitchensis]	gi|203340482|gb|FJ094174.1|	281	1e-72	Pinus taeda isolate 3809 anonymous locus 2_3482_01 genomic sequence	sp|Q56YJ8|FAMA_ARATH	214	1e-55	Transcription factor FAMA OS=Arabidopsis thaliana GN=FMA PE=1 SV=1	--	--	--	--	--	K13422	3e-12	72.4	gmx:100790854	transcription factor MYC2	-	GO:0005488//binding	GO:0005634//nucleus;GO:0005739//mitochondrion	--
Unigene17096_All	1962	468	240	12.4874	5.8238	-1.10044	Down	4.46e-23	8.49e-22	gi|148910714|gb|ABR18424.1|	478.8	1e-133	unknown [Picea sitchensis]	gi|270143690|gb|BT110642.1|	1513	0	Picea glauca clone GQ03224_N08 mRNA sequence	sp|Q9SV05|CCR35_ARATH	291	7e-79	Serine/threonine-protein kinase-like protein At3g51990 OS=Arabidopsis thaliana GN=At3g51990 PE=2 SV=1	ML0897	85.5	3e-16	COG0515	Serine/threonine protein kinase	K00924	6e-67	253	osa:4333525	[EC:2.7.1.-]	GO:0016310//phosphorylation	GO:0004672//protein kinase activity;GO:0000166//nucleotide binding	-	--
CL2027.Contig3_All	912	112	57	6.4291	2.9756	-1.11144	Down	1.12e-06	6.87e-06	gi|148910814|gb|ABR18473.1|	109.4	8e-23	unknown [Picea sitchensis]	gi|270148974|gb|BT115926.1|	117	2e-23	Picea glauca clone GQ03708_P06 mRNA sequence	sp|Q940K0|DRL15_ARATH	72.8	3e-13	Probable disease resistance protein At1g61180 OS=Arabidopsis thaliana GN=At1g61180 PE=2 SV=2	--	--	--	--	--	K13459	9e-16	82.4	vvi:100254298	disease resistance protein RPS2	-	-	-	--
CL6011.Contig2_All	546	118	58	11.314	5.0574	-1.16164	Down	2.22e-07	1.5e-06	gi|390979602|dbj|BAM21552.1|	91.7	6e-18	hypothetical protein [Cryptomeria japonica]	gi|270145284|gb|BT112236.1|	628	1e-177	Picea glauca clone GQ03312_G19 mRNA sequence	sp|C0LGP4|Y3475_ARATH	118	2e-27	Probable LRR receptor-like serine/threonine-protein kinase At3g47570 OS=Arabidopsis thaliana GN=At3g47570 PE=1 SV=1	CAC3280_2	68.2	8e-12	COG4886	Leucine-rich repeat (LRR) protein	K13420	7e-28	121	rcu:RCOM_0633880	LRR receptor-like serine/threonine-protein kinase FLS2 [EC:2.7.11.1]	GO:0044763;GO:0050896//response to stimulus	GO:0016772//transferase activity, transferring phosphorus-containing groups	GO:0043231//intracellular membrane-bounded organelle;GO:0044444//cytoplasmic part	--
CL415.Contig4_All	569	99	48	9.1085	4.0163	-1.18135	Down	1.54e-06	9.24e-06	gi|449464558|ref|XP_004149996.1|	61.6	8e-09	PREDICTED: probable leucine-rich repeat receptor-like protein kinase At1g35710-like [Cucumis sativus] >gi|449528593|ref|XP_004171288.1| PREDICTED: probable leucine-rich repeat receptor-like protein kinase At1g35710-like [Cucumis sativus]	gi|270135977|gb|BT102929.1|	236	2e-59	Picea glauca clone GQ0203_H01 mRNA sequence	sp|Q9LP24|Y1571_ARATH	159	8e-40	Probable leucine-rich repeat receptor-like protein kinase At1g35710 OS=Arabidopsis thaliana GN=At1g35710 PE=2 SV=1	alr0124_1	98.6	6e-21	COG4886	Leucine-rich repeat (LRR) protein	K13420	7e-38	154	vvi:100253808	LRR receptor-like serine/threonine-protein kinase FLS2 [EC:2.7.11.1]	-	-	-	--
Unigene8088_All	1686	349	168	10.8366	4.744	-1.19174	Down	8.47e-20	1.41e-18	gi|462403972|gb|EMJ09529.1|	471.1	2e-131	hypothetical protein PRUPE_ppa002400mg [Prunus persica]	gi|270151883|gb|BT118769.1|	1160	0	Picea glauca clone GQ04010_A09 mRNA sequence	sp|Q9LFH9|LRK81_ARATH	444	9e-125	L-type lectin-domain containing receptor kinase VIII.1 OS=Arabidopsis thaliana GN=LECRK81 PE=1 SV=1	YAR019c	109	2e-23	COG0515	Serine/threonine protein kinase	K13417	6e-62	236	aly:ARALYDRAFT_899604	somatic embryogenesis receptor kinase 4 [EC:2.7.10.1 2.7.11.1]	GO:0016310//phosphorylation	GO:0005488//binding;GO:0004672//protein kinase activity	-	--
Unigene16641_All	580	57	27	5.1449	2.2163	-1.21499	Down	0.000198589	0.000831017	gi|74325235|gb|ABA03062.1|	136	3e-31	putative CC-NBS-LRR protein [Pinus monticola]	gi|270139219|gb|BT106171.1|	73.8	2e-10	Picea glauca clone GQ02904_G04 mRNA sequence	sp|Q39214|RPM1_ARATH	78.2	3e-15	Disease resistance protein RPM1 OS=Arabidopsis thaliana GN=RPM1 PE=1 SV=1	--	--	--	--	--	K13457	2e-15	80.1	aly:ARALYDRAFT_478023	disease resistance protein RPM1	-	-	-	--
CL2946.Contig1_All	692	74	35	5.5982	2.408	-1.21713	Down	2.13e-05	0.000107081	gi|15240863|ref|NP_198640.1|	174.5	1e-42	Protein kinase family protein [Arabidopsis thaliana] >gi|332006902|gb|AED94285.1| Protein kinase family protein [Arabidopsis thaliana]	gi|270134061|gb|BT101013.1|	567	1e-159	Picea glauca clone GQ0063_N06 mRNA sequence	sp|Q3ECH2|Y1670_ARATH	159	1e-39	Probable receptor-like protein kinase At1g67000 OS=Arabidopsis thaliana GN=At1g67000 PE=2 SV=2	lin0627	53.5	3e-07	COG0515	Serine/threonine protein kinase	K13417	2e-21	100	aly:ARALYDRAFT_899604	somatic embryogenesis receptor kinase 4 [EC:2.7.10.1 2.7.11.1]	GO:0016310//phosphorylation	GO:0004713//protein tyrosine kinase activity;GO:0000166//nucleotide binding	-	--
Unigene22378_All	735	72	34	5.1283	2.2023	-1.21947	Down	2.69e-05	0.000133114	gi|116790124|gb|ABK25508.1|	362.1	5e-99	unknown [Picea sitchensis]	gi|383129177|gb|FJ057200.2|	609	1e-171	Pinus taeda isolate 4676 anonymous locus 0_15252_01 genomic sequence >gi|383129179|gb|FJ057185.2| Pinus taeda isolate 4670 anonymous locus 0_15252_01 genomic sequence >gi|383129181|gb|FJ057195.2| Pinus taeda isolate 4668 anonymous locus 0_15252_01 genomic sequence >gi|383129183|gb|FJ057199.2| Pinus taeda isolate 4683 anonymous locus 0_15252_01 genomic sequence >gi|383129185|gb|FJ057189.2| Pinus t…	sp|Q40374|PR1_MEDTR	193	1e-49	Pathogenesis-related protein PR-1 OS=Medicago truncatula GN=PR-1 PE=2 SV=1	YJL078c_1	105	6e-23	COG2340	Uncharacterized protein with SCP/PR1 domains	K13449	3e-39	159	vvi:100258414	pathogenesis-related protein 1	GO:0048765//root hair cell differentiation	-	GO:0005576//extracellular region	--
Unigene11298_All	797	96	45	6.3058	2.6881	-1.23009	Down	1.03e-06	6.33e-06	gi|294462948|gb|ADE77014.1|	172.2	8e-42	unknown [Picea sitchensis]	gi|270135191|gb|BT102143.1|	61.9	9e-07	Picea glauca clone GQ0167_E23 mRNA sequence	sp|O23530|SNC1_ARATH	72	4e-13	Protein SUPPRESSOR OF npr1-1, CONSTITUTIVE 1 OS=Arabidopsis thaliana GN=SNC1 PE=1 SV=3	RSp0875	78.6	1e-14	COG4886	Leucine-rich repeat (LRR) protein	K03013	5e-18	89.7	vvi:100258335	DNA-directed RNA polymerases I, II, and III subunit RPABC1	-	-	-	--
Unigene24170_All	560	70	32	6.5439	2.7205	-1.26628	Down	2.01e-05	0.000101459	gi|462408453|gb|EMJ13787.1|	67.4	1e-10	hypothetical protein PRUPE_ppa015971mg, partial [Prunus persica]	gi|270140993|gb|BT107945.1|	396	1e-108	Picea glauca clone GQ03114_N23 mRNA sequence	sp|Q9C9H7|RLP12_ARATH	110	4e-25	Receptor-like protein 12 OS=Arabidopsis thaliana GN=RLP12 PE=2 SV=2	RSp0875	57	2e-08	COG4886	Leucine-rich repeat (LRR) protein	K13420	5e-24	108	aly:ARALYDRAFT_356368	LRR receptor-like serine/threonine-protein kinase FLS2 [EC:2.7.11.1]	-	-	-	--
Unigene6610_All	868	265	120	15.9828	6.5819	-1.27994	Down	4.73e-17	6.85e-16	gi|361067217|gb|AEW07920.1|	199.9	4e-50	Pinus taeda anonymous locus 0_14601_01 genomic sequence	gi|270138470|gb|BT105422.1|	807	0	Picea glauca clone GQ02822_D05 mRNA sequence	sp|Q9SRR7|CML3_ARATH	124	5e-29	Calmodulin-like protein 3 OS=Arabidopsis thaliana GN=CML3 PE=2 SV=1	SPAC3A12.14	75.9	8e-14	COG5126	Ca2+-binding protein (EF-Hand superfamily)	K13448	7e-29	125	zma:100285448	calcium-binding protein CML	-	GO:0005509//calcium ion binding	GO:0005777//peroxisome	--
Unigene7969_All	933	204	92	11.4465	4.6946	-1.28583	Down	1.49e-13	1.75e-12	gi|359477923|ref|XP_002268448.2|	68.9	1e-10	PREDICTED: receptor-like protein 12-like [Vitis vinifera]	gi|270152149|gb|BT119035.1|	194	1e-46	Picea glauca clone GQ04013_L01 mRNA sequence	sp|Q9ZPS9|BRL2_ARATH	160	1e-39	Serine/threonine-protein kinase BRI1-like 2 OS=Arabidopsis thaliana GN=BRL2 PE=1 SV=1	MA2301_1	69.7	7e-12	COG4886	Leucine-rich repeat (LRR) protein	K13420	3e-37	153	ath:AT5G46330	LRR receptor-like serine/threonine-protein kinase FLS2 [EC:2.7.11.1]	-	-	-	--
CL1658.Contig4_All	1572	178	80	5.9278	2.4229	-1.29076	Down	4.51e-12	4.79e-11	gi|413919964|gb|AFW59896.1|	277.7	3e-73	hypothetical protein ZEAMMB73_177752 [Zea mays]	--	--	--	--	sp|Q9C9H7|RLP12_ARATH	244	1e-64	Receptor-like protein 12 OS=Arabidopsis thaliana GN=RLP12 PE=2 SV=2	alr0124_1	125	2e-28	COG4886	Leucine-rich repeat (LRR) protein	K13420	6e-62	236	aly:ARALYDRAFT_356368	LRR receptor-like serine/threonine-protein kinase FLS2 [EC:2.7.11.1]	-	-	-	--
CL2203.Contig1_All	3115	3798	1702	63.8297	26.0132	-1.29498	Down	4.13e-226	8.27e-224	gi|356499077|ref|XP_003518370.1|	1052.7	0	PREDICTED: potassium channel SKOR-like [Glycine max]	gi|270136292|gb|BT103244.1|	1326	0	Picea glauca clone GQ0209_M01 mRNA sequence	sp|Q9M8S6|SKOR_ARATH	999	0	Potassium channel SKOR OS=Arabidopsis thaliana GN=SKOR PE=1 SV=1	all2748	94.7	8e-19	COG0666	FOG: Ankyrin repeat	K05391	1e-15	84.3	sbi:SORBI_06g030420	cyclic nucleotide gated channel, other eukaryote	GO:0009628//response to abiotic stimulus;GO:0006813//potassium ion transport;GO:0010200//response to chitin;GO:0009737//response to abscisic acid stimulus;GO:0050832//defense response to fungus	GO:0030551//cyclic nucleotide binding;GO:0005242//inward rectifier potassium channel activity;GO:0015271//outward rectifier potassium channel activity	GO:0016020//membrane;GO:0005634//nucleus	--
CL151.Contig4_All	1204	259	116	11.2616	4.5869	-1.29582	Down	5.4e-17	7.78e-16	gi|147836269|emb|CAN71011.1|	79	1e-13	hypothetical protein VITISV_002381 [Vitis vinifera]	gi|270140993|gb|BT107945.1|	252	7e-64	Picea glauca clone GQ03114_N23 mRNA sequence	sp|C0LGS2|Y4361_ARATH	184	9e-47	Probable LRR receptor-like serine/threonine-protein kinase At4g36180 OS=Arabidopsis thaliana GN=At4g36180 PE=1 SV=1	alr0124_1	98.2	3e-20	COG4886	Leucine-rich repeat (LRR) protein	K13420	3e-46	184	pop:POPTR_1075175	LRR receptor-like serine/threonine-protein kinase FLS2 [EC:2.7.11.1]	-	-	-	--
Unigene22306_All	579	56	25	5.0633	2.0557	-1.30045	Down	0.000100583	0.00044546	gi|460401397|ref|XP_004246211.1|	109	4e-23	PREDICTED: probable receptor-like protein kinase At1g49730-like [Solanum lycopersicum]	gi|270142907|gb|BT109859.1|	278	6e-72	Picea glauca clone GQ03213_B14 mRNA sequence	sp|Q9LX29|ACR4_ARATH	96.3	1e-20	Serine/threonine-protein kinase-like protein ACR4 OS=Arabidopsis thaliana GN=ACR4 PE=1 SV=1	--	--	--	--	--	K00924	3e-20	96.3	ath:AT3G59420	[EC:2.7.1.-]	-	GO:0016301//kinase activity	-	--
CL3521.Contig1_All	2064	1398	618	35.4587	14.2551	-1.31466	Down	2.02e-86	1.39e-84	gi|148909450|gb|ABR17823.1|	678.7	0	unknown [Picea sitchensis]	gi|270141110|gb|BT108062.1|	1289	0	Picea glauca clone GQ03116_G16 mRNA sequence	sp|Q9LSC2|Y3589_ARATH	411	7e-115	PTI1-like tyrosine-protein kinase At3g15890 OS=Arabidopsis thaliana GN=At3g15890 PE=1 SV=1	lin1934_1	99	3e-20	COG0515	Serine/threonine protein kinase	K04733	5e-77	287	smo:SELMODRAFT_159261	interleukin-1 receptor-associated kinase 4 [EC:2.7.11.1]	GO:0006468//protein phosphorylation	GO:0005524//ATP binding;GO:0004674//protein serine/threonine kinase activity	GO:0005886//plasma membrane	--
CL538.Contig1_All	1014	139	61	7.1763	2.8641	-1.32516	Down	4.42e-10	3.98e-09	gi|294461132|gb|ADE76131.1|	366.3	4e-100	unknown [Picea sitchensis]	gi|270138261|gb|BT105213.1|	555	1e-155	Picea glauca clone GQ02819_L23 mRNA sequence	sp|Q9LT96|Y5977_ARATH	261	5e-70	Probable leucine-rich repeat receptor-like protein kinase At5g49770 OS=Arabidopsis thaliana GN=At5g49770 PE=2 SV=1	YAR019c	83.6	5e-16	COG0515	Serine/threonine protein kinase	K04733	1e-52	205	smo:SELMODRAFT_159261	interleukin-1 receptor-associated kinase 4 [EC:2.7.11.1]	GO:0030003//cellular cation homeostasis;GO:0070838//divalent metal ion transport;GO:0006569//tryptophan catabolic process;GO:0009684//indoleacetic acid biosynthetic process;GO:0044242//cellular lipid catabolic process	GO:0016301//kinase activity	GO:0005773//vacuole;GO:0005886//plasma membrane	--
CL2277.Contig2_All	1543	369	160	12.5195	4.9368	-1.34253	Down	8.51e-25	1.72e-23	gi|224285661|gb|ACN40546.1|	105.9	2e-21	unknown [Picea sitchensis]	gi|270134585|gb|BT101537.1|	599	1e-168	Picea glauca clone GQ01306_M18 mRNA sequence	sp|Q93ZM9|TIF9_ARATH	75.1	1e-13	Protein TIFY 9 OS=Arabidopsis thaliana GN=TIFY9 PE=1 SV=1	--	--	--	--	--	K13464	2e-16	85.9	osa:4337240	jasmonate ZIM domain-containing protein	-	-	-	--
CL3636.Contig2_All	1910	236	102	6.4685	2.5425	-1.34718	Down	1.71e-16	2.42e-15	gi|302793781|ref|XP_002978655.1|	225.7	2e-57	hypothetical protein SELMODRAFT_56610 [Selaginella moellendorffii] >gi|302805679|ref|XP_002984590.1| hypothetical protein SELMODRAFT_46532 [Selaginella moellendorffii] >gi|300147572|gb|EFJ14235.1| hypothetical protein SELMODRAFT_46532 [Selaginella moellendorffii] >gi|300153464|gb|EFJ20102.1| hypothetical protein SELMODRAFT_56610 [Selaginella moellendorffii]	gi|270139701|gb|BT106653.1|	77.8	4e-11	Picea glauca clone GQ03007_E02 mRNA sequence	sp|Q9S7Y1|BH030_ARATH	204	2e-52	Transcription factor bHLH30 OS=Arabidopsis thaliana GN=BHLH30 PE=1 SV=1	--	--	--	--	--	K13422	1e-07	57	gmx:100790854	transcription factor MYC2	GO:0006355//regulation of transcription, DNA-dependent	GO:0046983//protein dimerization activity	-	--
CL265.Contig1_All	1217	169	73	7.2698	2.8558	-1.34802	Down	3.1e-12	3.34e-11	gi|225444893|ref|XP_002279486.1|	97.4	5e-19	PREDICTED: putative transcription factor bHLH041 [Vitis vinifera] >gi|297738655|emb|CBI27900.3| unnamed protein product [Vitis vinifera]	gi|270146742|gb|BT113694.1|	565	1e-158	Picea glauca clone GQ03417_K22 mRNA sequence	sp|Q9FIX5|BH092_ARATH	65.1	8e-11	Transcription factor bHLH92 OS=Arabidopsis thaliana GN=BHLH92 PE=2 SV=1	--	--	--	--	--	K13422	8e-08	56.6	mtr:MTR_5g030430	transcription factor MYC2	-	-	-	--
Unigene24513_All	603	79	34	6.8586	2.6844	-1.35331	Down	1.83e-06	1.09e-05	gi|225425605|ref|XP_002265829.1|	134.4	1e-30	PREDICTED: cysteine-rich receptor-like protein kinase 2 [Vitis vinifera]	gi|270144975|gb|BT111927.1|	240	1e-60	Picea glauca clone GQ03307_L22 mRNA sequence	sp|Q9CAL3|CRK2_ARATH	117	5e-27	Cysteine-rich receptor-like protein kinase 2 OS=Arabidopsis thaliana GN=CRK2 PE=2 SV=1	--	--	--	--	--	K13418	2e-14	77	aly:ARALYDRAFT_895025	somatic embryogenesis receptor kinase 1 [EC:2.7.10.1 2.7.11.1]	-	GO:0016772//transferase activity, transferring phosphorus-containing groups	-	--
Unigene416_All	967	100	43	5.4138	2.1171	-1.35455	Down	7.59e-08	5.44e-07	gi|449439783|ref|XP_004137665.1|	386.3	4e-106	PREDICTED: probable leucine-rich repeat receptor-like protein kinase At5g49770-like [Cucumis sativus] >gi|449497159|ref|XP_004160329.1| PREDICTED: probable leucine-rich repeat receptor-like protein kinase At5g49770-like [Cucumis sativus]	gi|270149967|gb|BT116853.1|	1588	0	Picea glauca clone GQ03807_P11 mRNA sequence	sp|Q9LT96|Y5977_ARATH	298	4e-81	Probable leucine-rich repeat receptor-like protein kinase At5g49770 OS=Arabidopsis thaliana GN=At5g49770 PE=2 SV=1	alr0124_1	92.8	8e-19	COG4886	Leucine-rich repeat (LRR) protein	K13420	2e-35	147	sbi:SORBI_06g028760	LRR receptor-like serine/threonine-protein kinase FLS2 [EC:2.7.11.1]	GO:0045492//xylan biosynthetic process;GO:0007169//transmembrane receptor protein tyrosine kinase signaling pathway;GO:0006468//protein phosphorylation;GO:0000165//MAPK cascade;GO:0010413//glucuronoxylan metabolic process	GO:0016491//oxidoreductase activity;GO:0004674//protein serine/threonine kinase activity;GO:0005524//ATP binding	GO:0016020//membrane;GO:0005576//extracellular region	--
CL1658.Contig3_All	1701	230	98	7.0786	2.7429	-1.36776	Down	1.87e-16	2.63e-15	gi|255544147|ref|XP_002513136.1|	169.1	2e-40	serine-threonine protein kinase, plant-type, putative [Ricinus communis] >gi|223548147|gb|EEF49639.1| serine-threonine protein kinase, plant-type, putative [Ricinus communis]	--	--	--	--	sp|Q9LP24|Y1571_ARATH	248	8e-66	Probable leucine-rich repeat receptor-like protein kinase At1g35710 OS=Arabidopsis thaliana GN=At1g35710 PE=2 SV=1	alr0124_1	126	1e-28	COG4886	Leucine-rich repeat (LRR) protein	K13420	1e-64	245	aly:ARALYDRAFT_356368	LRR receptor-like serine/threonine-protein kinase FLS2 [EC:2.7.11.1]	-	GO:0016740//transferase activity	-	--
CL151.Contig6_All	950	94	40	5.18	2.0046	-1.36964	Down	1.47e-07	1.02e-06	gi|225466101|ref|XP_002265750.1|	93.6	5e-18	PREDICTED: LRR receptor-like serine/threonine-protein kinase FLS2-like [Vitis vinifera]	gi|270140993|gb|BT107945.1|	202	5e-49	Picea glauca clone GQ03114_N23 mRNA sequence	sp|C0LGQ5|GSO1_ARATH	166	1e-41	LRR receptor-like serine/threonine-protein kinase GSO1 OS=Arabidopsis thaliana GN=GSO1 PE=2 SV=1	alr0124_1	74.3	3e-13	COG4886	Leucine-rich repeat (LRR) protein	K13420	1e-37	155	rcu:RCOM_0633880	LRR receptor-like serine/threonine-protein kinase FLS2 [EC:2.7.11.1]	-	-	-	--
CL14.Contig1_All	670	49	20	3.8287	1.4212	-1.42975	Down	9.31e-05	0.000414765	gi|359482811|ref|XP_002270207.2|	53.5	3e-06	PREDICTED: probable LRR receptor-like serine/threonine-protein kinase At3g47570-like [Vitis vinifera]	gi|270148997|gb|BT115949.1|	468	1e-129	Picea glauca clone GQ03709_E17 mRNA sequence	sp|C0LGP4|Y3475_ARATH	150	8e-37	Probable LRR receptor-like serine/threonine-protein kinase At3g47570 OS=Arabidopsis thaliana GN=At3g47570 PE=1 SV=1	--	--	--	--	--	K13428	8e-36	148	aly:ARALYDRAFT_488953	LRR receptor-like serine/threonine-protein kinase EFR [EC:2.7.11.1]	-	GO:0016772//transferase activity, transferring phosphorus-containing groups	-	--
CL415.Contig1_All	1937	17844	7119	482.268	174.977	-1.46267	Down	0	0	gi|460387406|ref|XP_004239368.1|	96.7	1e-18	PREDICTED: LRR receptor-like serine/threonine-protein kinase GSO2-like [Solanum lycopersicum]	gi|270135977|gb|BT102929.1|	500	1e-138	Picea glauca clone GQ0203_H01 mRNA sequence	sp|Q9LP24|Y1571_ARATH	272	6e-73	Probable leucine-rich repeat receptor-like protein kinase At1g35710 OS=Arabidopsis thaliana GN=At1g35710 PE=2 SV=1	alr0124_1	139	1e-32	COG4886	Leucine-rich repeat (LRR) protein	K13420	9e-71	266	osa:4337016	LRR receptor-like serine/threonine-protein kinase FLS2 [EC:2.7.11.1]	-	-	-	--
Unigene403_All	737	83	33	5.8957	2.1318	-1.46759	Down	1.98e-07	1.34e-06	gi|356565912|ref|XP_003551180.1|	362.5	3e-99	PREDICTED: serine/threonine-protein kinase PBS1-like [Glycine max]	gi|270144790|gb|BT111742.1|	1255	0	Picea glauca clone GQ03303_A17 mRNA sequence	sp|Q9FE20|PBS1_ARATH	267	5e-72	Serine/threonine-protein kinase PBS1 OS=Arabidopsis thaliana GN=PBS1 PE=1 SV=1	L138452_1	100	2e-21	COG0515	Serine/threonine protein kinase	K13430	4e-72	269	rcu:RCOM_1078760	serine/threonine-protein kinase PBS1 [EC:2.7.11.1]	GO:0045492//xylan biosynthetic process;GO:0000186//activation of MAPKK activity;GO:0016926//protein desumoylation;GO:0050665//hydrogen peroxide biosynthetic process;GO:0010228//vegetative to reproductive phase transition of meristem;GO:0010413//glucuronoxylan metabolic process	GO:0004713//protein tyrosine kinase activity;GO:0004709//MAP kinase kinase kinase activity;GO:0005524//ATP binding	GO:0005886//plasma membrane	--
Unigene17849_All	1906	381	151	10.4647	3.7718	-1.47221	Down	3.77e-29	8.96e-28	gi|302793781|ref|XP_002978655.1|	225.7	2e-57	hypothetical protein SELMODRAFT_56610 [Selaginella moellendorffii] >gi|302805679|ref|XP_002984590.1| hypothetical protein SELMODRAFT_46532 [Selaginella moellendorffii] >gi|300147572|gb|EFJ14235.1| hypothetical protein SELMODRAFT_46532 [Selaginella moellendorffii] >gi|300153464|gb|EFJ20102.1| hypothetical protein SELMODRAFT_56610 [Selaginella moellendorffii]	gi|203293761|gb|FJ047453.1|	192	9e-46	Pinus taeda isolate 4628 anonymous locus 0_11790_02 genomic sequence	sp|Q9S7Y1|BH030_ARATH	215	8e-56	Transcription factor bHLH30 OS=Arabidopsis thaliana GN=BHLH30 PE=1 SV=1	--	--	--	--	--	K13422	7e-10	64.3	pop:POPTR_836925	transcription factor MYC2	-	GO:0005488//binding	-	--
Unigene24721_All	1189	102	40	4.491	1.6017	-1.48743	Down	5.58e-09	4.53e-08	gi|225454212|ref|XP_002274233.1|	188.3	2e-46	PREDICTED: putative disease resistance protein At1g50180-like [Vitis vinifera]	--	--	--	--	sp|Q8W4J9|RPP8_ARATH	125	6e-29	Disease resistance protein RPP8 OS=Arabidopsis thaliana GN=RPP8 PE=1 SV=2	--	--	--	--	--	K13457	5e-30	130	rcu:RCOM_0742270	disease resistance protein RPM1	-	-	-	--
Unigene5180_All	1421	362	138	13.3365	4.6236	-1.52829	Down	2.84e-29	6.78e-28	gi|116791126|gb|ABK25866.1|	604.4	1e-171	unknown [Picea sitchensis]	gi|270144891|gb|BT111843.1|	1582	0	Picea glauca clone GQ03304_E19 mRNA sequence	sp|Q9FYA2|WRK75_ARATH	162	3e-40	Probable WRKY transcription factor 75 OS=Arabidopsis thaliana GN=WRKY75 PE=2 SV=1	--	--	--	--	--	K13424	3e-24	111	rcu:RCOM_0664190	WRKY transcription factor 33	GO:0006355//regulation of transcription, DNA-dependent	GO:0003700//sequence-specific DNA binding transcription factor activity;GO:0043565//sequence-specific DNA binding	GO:0009536//plastid	--
Unigene10301_All	672	142	53	11.0623	3.7549	-1.5588	Down	1.03e-12	1.14e-11	gi|302143967|emb|CBI23072.3|	122.5	5e-27	unnamed protein product [Vitis vinifera]	--	--	--	--	sp|Q9LP24|Y1571_ARATH	179	1e-45	Probable leucine-rich repeat receptor-like protein kinase At1g35710 OS=Arabidopsis thaliana GN=At1g35710 PE=2 SV=1	MA2301_1	84	2e-16	COG4886	Leucine-rich repeat (LRR) protein	K13420	7e-40	161	aly:ARALYDRAFT_356368	LRR receptor-like serine/threonine-protein kinase FLS2 [EC:2.7.11.1]	GO:0016310//phosphorylation;GO:0009814//defense response, incompatible interaction;GO:0000165//MAPK cascade	GO:0004672//protein kinase activity;GO:0000166//nucleotide binding	GO:0016020//membrane	--
Unigene20787_All	330	43	16	6.8215	2.3083	-1.56326	Down	9.33e-05	0.000415688	gi|296083257|emb|CBI22893.3|	83.6	1e-15	unnamed protein product [Vitis vinifera]	gi|115437283|ref|NM_001049792.1|	60	1e-06	Oryza sativa Japonica Group Os01g0535400 (Os01g0535400) mRNA, complete cds	sp|Q9CAL3|CRK2_ARATH	75.5	7e-15	Cysteine-rich receptor-like protein kinase 2 OS=Arabidopsis thaliana GN=CRK2 PE=2 SV=1	--	--	--	--	--	K00924	7e-08	53.5	aly:ARALYDRAFT_313416	[EC:2.7.1.-]	GO:0046777//protein autophosphorylation;GO:0010193//response to ozone;GO:0034976//response to endoplasmic reticulum stress;GO:0006457//protein folding;GO:0006857//oligopeptide transport;GO:0009408//response to heat;GO:0009644//response to high light intensity;GO:0042542//response to hydrogen peroxide	GO:0004674//protein serine/threonine kinase activity	GO:0009506//plasmodesma;GO:0005886//plasma membrane	--
CL5993.Contig2_All	1302	328	119	13.1883	4.3514	-1.59971	Down	2.08e-28	4.82e-27	gi|148906800|gb|ABR16546.1|	771.5	0	unknown [Picea sitchensis]	gi|203340482|gb|FJ094174.1|	281	9e-73	Pinus taeda isolate 3809 anonymous locus 2_3482_01 genomic sequence	sp|Q56YJ8|FAMA_ARATH	212	4e-55	Transcription factor FAMA OS=Arabidopsis thaliana GN=FMA PE=1 SV=1	--	--	--	--	--	K13422	9e-13	73.2	gmx:100790854	transcription factor MYC2	-	-	GO:0044444//cytoplasmic part;GO:0043231//intracellular membrane-bounded organelle	--
Unigene19813_All	994	317	111	16.6955	5.3165	-1.65091	Down	1.02e-28	2.4e-27	gi|224286330|gb|ACN40873.1|	403.3	3e-111	unknown [Picea sitchensis]	gi|270138150|gb|BT105102.1|	967	0	Picea glauca clone GQ02818_J19 mRNA sequence	sp|Q94AG2|SERK1_ARATH	242	3e-64	Somatic embryogenesis receptor kinase 1 OS=Arabidopsis thaliana GN=SERK1 PE=1 SV=2	RSp0842	62.4	1e-09	COG4886	Leucine-rich repeat (LRR) protein	K13416	8e-66	248	vvi:100253855	brassinosteroid insensitive 1-associated receptor kinase 1 [EC:2.7.10.1 2.7.11.1]	GO:0016310//phosphorylation;GO:0055114//oxidation-reduction process	GO:0016301//kinase activity;GO:0032440//2-alkenal reductase [NAD(P)] activity	GO:0016023//cytoplasmic membrane-bounded vesicle	--
Unigene1663_All	795	175	61	11.5238	3.653	-1.65746	Down	1.27e-16	1.8e-15	gi|383151427|gb|AFG57740.1|	223.8	2e-57	Pinus taeda anonymous locus 2_5740_01 genomic sequence >gi|383151429|gb|AFG57741.1| Pinus taeda anonymous locus 2_5740_01 genomic sequence >gi|383151431|gb|AFG57742.1| Pinus taeda anonymous locus 2_5740_01 genomic sequence >gi|383151433|gb|AFG57743.1| Pinus taeda anonymous locus 2_5740_01 genomic sequence >gi|383151435|gb|AFG57744.1| Pinus taeda anonymous locus 2_5740_01 genomic sequence >gi|3831…	gi|270138051|gb|BT105003.1|	1023	0	Picea glauca clone GQ02817_J07 mRNA sequence	sp|Q9LVM0|Y5830_ARATH	179	2e-45	Probable inactive receptor kinase At5g58300 OS=Arabidopsis thaliana GN=At5g58300 PE=1 SV=1	lin1934_1	63.5	4e-10	COG0515	Serine/threonine protein kinase	K10576	2e-20	97.8	vvi:100250088	ubiquitin-conjugating enzyme E2 H [EC:6.3.2.19]	GO:0006468//protein phosphorylation	GO:0004672//protein kinase activity;GO:0005524//ATP binding	GO:0071944//cell periphery;GO:0016020//membrane	--
Unigene12063_All	454	79	27	9.1096	2.8314	-1.68587	Down	1.98e-08	1.51e-07	gi|302143967|emb|CBI23072.3|	73.9	8e-13	unnamed protein product [Vitis vinifera]	--	--	--	--	sp|P93194|RPK1_IPONI	125	8e-30	Receptor-like protein kinase OS=Ipomoea nil GN=INRPK1 PE=2 SV=2	alr0124_1	62.4	3e-10	COG4886	Leucine-rich repeat (LRR) protein	K13420	4e-25	111	sbi:SORBI_06g028760	LRR receptor-like serine/threonine-protein kinase FLS2 [EC:2.7.11.1]	GO:0006468//protein phosphorylation	GO:0004713//protein tyrosine kinase activity;GO:0005524//ATP binding;GO:0004674//protein serine/threonine kinase activity	-	--
Unigene17479_All	742	109	37	7.6904	2.3741	-1.69568	Down	3.35e-11	3.34e-10	gi|449439783|ref|XP_004137665.1|	295.8	4e-79	PREDICTED: probable leucine-rich repeat receptor-like protein kinase At5g49770-like [Cucumis sativus] >gi|449497159|ref|XP_004160329.1| PREDICTED: probable leucine-rich repeat receptor-like protein kinase At5g49770-like [Cucumis sativus]	gi|270149967|gb|BT116853.1|	1154	0	Picea glauca clone GQ03807_P11 mRNA sequence	sp|Q9LT96|Y5977_ARATH	187	4e-48	Probable leucine-rich repeat receptor-like protein kinase At5g49770 OS=Arabidopsis thaliana GN=At5g49770 PE=2 SV=1	--	--	--	--	--	K13429	2e-09	60.8	sbi:SORBI_02g029560	chitin elicitor receptor kinase 1	GO:0045492//xylan biosynthetic process;GO:0007169//transmembrane receptor protein tyrosine kinase signaling pathway;GO:0006468//protein phosphorylation;GO:0000165//MAPK cascade;GO:0010413//glucuronoxylan metabolic process	GO:0016491//oxidoreductase activity;GO:0004674//protein serine/threonine kinase activity;GO:0005524//ATP binding	GO:0016020//membrane;GO:0005576//extracellular region	--
CL4375.Contig1_All	429	80	27	9.7624	2.9964	-1.70401	Down	1.25e-08	9.83e-08	gi|255558292|ref|XP_002520173.1|	102.8	1e-21	serine-threonine protein kinase, plant-type, putative [Ricinus communis] >gi|223540665|gb|EEF42228.1| serine-threonine protein kinase, plant-type, putative [Ricinus communis]	gi|270148485|gb|BT115437.1|	105	4e-20	Picea glauca clone GQ03616_L02 mRNA sequence	sp|C0LGT6|EFR_ARATH	57.4	3e-09	LRR receptor-like serine/threonine-protein kinase EFR OS=Arabidopsis thaliana GN=EFR PE=1 SV=1	--	--	--	--	--	K13428	8e-09	57.4	ath:AT5G20480	LRR receptor-like serine/threonine-protein kinase EFR [EC:2.7.11.1]	-	-	-	--
Unigene21776_All	3618	968	315	14.0066	4.1451	-1.75663	Down	8.19e-92	6.05e-90	gi|359480130|ref|XP_002268160.2|	1033.5	0	PREDICTED: probable LRR receptor-like serine/threonine-protein kinase At5g48740-like [Vitis vinifera] >gi|297744356|emb|CBI37326.3| unnamed protein product [Vitis vinifera]	gi|270138162|gb|BT105114.1|	1748	0	Picea glauca clone GQ02818_L21 mRNA sequence	sp|C0LGV0|Y5487_ARATH	931	0	Probable LRR receptor-like serine/threonine-protein kinase At5g48740 OS=Arabidopsis thaliana GN=At5g48740 PE=2 SV=1	SA1063_1	103	2e-21	COG0515	Serine/threonine protein kinase	K13416	3e-85	315	rcu:RCOM_1534760	brassinosteroid insensitive 1-associated receptor kinase 1 [EC:2.7.10.1 2.7.11.1]	GO:0045492//xylan biosynthetic process;GO:0006468//protein phosphorylation;GO:0000165//MAPK cascade;GO:0010413//glucuronoxylan metabolic process;GO:0060255	GO:0000166//nucleotide binding;GO:0004674//protein serine/threonine kinase activity	GO:0005886//plasma membrane	--
Unigene4919_All	288	37	12	6.7257	1.9837	-1.76149	Down	8.12e-05	0.000366142	gi|470132076|ref|XP_004301912.1|	52.4	2e-06	PREDICTED: probable LRR receptor-like serine/threonine-protein kinase At4g08850-like [Fragaria vesca subsp. vesca]	gi|270144539|gb|BT111491.1|	172	1e-40	Picea glauca clone GQ03238_H05 mRNA sequence	sp|Q9LP24|Y1571_ARATH	93.6	2e-20	Probable leucine-rich repeat receptor-like protein kinase At1g35710 OS=Arabidopsis thaliana GN=At1g35710 PE=2 SV=1	RSp0842	51.6	3e-07	COG4886	Leucine-rich repeat (LRR) protein	K13420	6e-20	93.6	rcu:RCOM_0633880	LRR receptor-like serine/threonine-protein kinase FLS2 [EC:2.7.11.1]	GO:0016310//phosphorylation	GO:0004672//protein kinase activity	-	--
CL5641.Contig1_All	423	56	18	6.9306	2.0259	-1.77442	Down	1.01e-06	6.23e-06	gi|291246022|gb|ADD85140.1|	68.9	2e-11	calmodulin [Triticum aestivum]	gi|242383645|emb|FP092489.1|	337	6e-90	Phyllostachys edulis cDNA clone: bphyem119l23, full insert sequence	sp|Q71UH5|CALM_PYTSP	196	4e-51	Calmodulin OS=Pythium splendens PE=2 SV=1	SPAC3A12.14	165	2e-41	COG5126	Ca2+-binding protein (EF-Hand superfamily)	K02183	2e-50	195	zma:100281919	calmodulin	-	GO:0005509//calcium ion binding	-	--
CL461.Contig1_All	244	33	10	7.0803	1.9512	-1.85945	Down	0.000114502	0.000502612	gi|116786000|gb|ABK23936.1|	107.8	5e-23	unknown [Picea sitchensis]	gi|270144051|gb|BT111003.1|	198	2e-48	Picea glauca clone GQ03231_B07 mRNA sequence	sp|P08299|PR1A_TOBAC	57.8	1e-09	Pathogenesis-related protein 1A OS=Nicotiana tabacum PE=1 SV=1	--	--	--	--	--	K13449	3e-08	54.7	rcu:RCOM_1381930	pathogenesis-related protein 1	-	-	GO:0005576//extracellular region	--
Unigene16997_All	1599	252	75	8.2505	2.2331	-1.88543	Down	1.49e-27	3.36e-26	gi|294464637|gb|ADE77827.1|	570.1	3e-161	unknown [Picea sitchensis]	gi|270152674|gb|BT119560.1|	1574	0	Picea glauca clone GQ04107_D16 mRNA sequence	sp|Q93WY4|WRK12_ARATH	191	1e-48	Probable WRKY transcription factor 12 OS=Arabidopsis thaliana GN=WRKY12 PE=2 SV=1	--	--	--	--	--	K13424	3e-25	115	pop:POPTR_577093	WRKY transcription factor 33	GO:0009718//anthocyanin-containing compound biosynthetic process;GO:0006355//regulation of transcription, DNA-dependent	GO:0043565//sequence-specific DNA binding;GO:0003700//sequence-specific DNA binding transcription factor activity	-	--
Unigene26343_All	665	65	19	5.117	1.3603	-1.91137	Down	2.87e-08	2.16e-07	gi|225466101|ref|XP_002265750.1|	58.5	1e-07	PREDICTED: LRR receptor-like serine/threonine-protein kinase FLS2-like [Vitis vinifera]	gi|270152149|gb|BT119035.1|	131	1e-27	Picea glauca clone GQ04013_L01 mRNA sequence	sp|C0LGQ5|GSO1_ARATH	120	5e-28	LRR receptor-like serine/threonine-protein kinase GSO1 OS=Arabidopsis thaliana GN=GSO1 PE=2 SV=1	MA2301_1	55.1	1e-07	COG4886	Leucine-rich repeat (LRR) protein	K13420	6e-26	115	aly:ARALYDRAFT_356368	LRR receptor-like serine/threonine-protein kinase FLS2 [EC:2.7.11.1]	-	-	-	--
Unigene24697_All	239	30	8	6.5713	1.5936	-2.04389	Down	9.2e-05	0.000410734	gi|462410123|gb|EMJ15457.1|	70.1	1e-11	hypothetical protein PRUPE_ppa024554mg, partial [Prunus persica]	--	--	--	--	sp|O80809|CLV2_ARATH	58.5	9e-10	Leucine-rich repeat receptor-like protein CLAVATA2 OS=Arabidopsis thaliana GN=CLV2 PE=1 SV=1	--	--	--	--	--	K13428	5e-07	50.8	ath:AT5G20480	LRR receptor-like serine/threonine-protein kinase EFR [EC:2.7.11.1]	GO:0044763;GO:0050896//response to stimulus;GO:0008152//metabolic process	GO:0016772//transferase activity, transferring phosphorus-containing groups	GO:0016023//cytoplasmic membrane-bounded vesicle	--
CL4482.Contig2_All	297	34	9	5.9931	1.4427	-2.05453	Down	2.86e-05	0.000141169	gi|361068093|gb|AEW08358.1|	113.2	1e-24	Pinus taeda anonymous locus 2_6996_01 genomic sequence >gi|383157930|gb|AFG61314.1| Pinus taeda anonymous locus 2_6996_01 genomic sequence >gi|383157932|gb|AFG61315.1| Pinus taeda anonymous locus 2_6996_01 genomic sequence >gi|383157934|gb|AFG61316.1| Pinus taeda anonymous locus 2_6996_01 genomic sequence >gi|383157936|gb|AFG61317.1| Pinus taeda anonymous locus 2_6996_01 genomic sequence >gi|3831…	gi|270148194|gb|BT115146.1|	256	1e-65	Picea glauca clone GQ03610_C01 mRNA sequence	sp|P24068|OCS1_MAIZE	69.3	5e-13	Ocs element-binding factor 1 OS=Zea mays GN=OBF1 PE=2 SV=2	--	--	--	--	--	K04371	8e-18	86.7	vvi:100254083	extracellular signal-regulated kinase 1/2 [EC:2.7.11.24]	GO:0009845//seed germination;GO:0006355//regulation of transcription, DNA-dependent;GO:0009410//response to xenobiotic stimulus;GO:0030968//endoplasmic reticulum unfolded protein response	GO:0043565//sequence-specific DNA binding;GO:0003700//sequence-specific DNA binding transcription factor activity;GO:0046982//protein heterodimerization activity	GO:0005634//nucleus	--
Unigene31740_All	284	103	27	18.9865	4.5262	-2.0686	Down	1.61e-13	1.88e-12	gi|255536713|ref|XP_002509423.1|	78.2	4e-14	protein with unknown function [Ricinus communis] >gi|223549322|gb|EEF50810.1| protein with unknown function [Ricinus communis]	--	--	--	--	sp|Q9SGP2|HSL1_ARATH	70.5	2e-13	Receptor-like protein kinase HSL1 OS=Arabidopsis thaliana GN=HSL1 PE=2 SV=1	--	--	--	--	--	K00924	6e-13	70.5	aly:ARALYDRAFT_473063	[EC:2.7.1.-]	GO:0048767//root hair elongation;GO:0048825//cotyledon development;GO:0000271//polysaccharide biosynthetic process;GO:0043481//anthocyanin accumulation in tissues in response to UV light;GO:0009825//multidimensional cell growth;GO:0043687//post-translational protein modification;GO:0051301//cell division;GO:0048653//anther development;GO:0009926//auxin polar transport;GO:0010075//regulation of me…	GO:0004672//protein kinase activity;GO:0043167//ion binding;GO:0000166//nucleotide binding;GO:0005515//protein binding	GO:0005886//plasma membrane	--
Unigene12838_All	640	143	37	11.6972	2.7524	-2.0874	Down	2.05e-18	3.2e-17	gi|148910783|gb|ABR18458.1|	52	8e-06	unknown [Picea sitchensis]	gi|270139664|gb|BT106616.1|	743	0	Picea glauca clone GQ03006_I10 mRNA sequence	sp|P58822|PGIP2_PHAVU	98.6	3e-21	Polygalacturonase inhibitor 2 OS=Phaseolus vulgaris GN=PGIP2 PE=1 SV=1	ECU09g0200	52.8	5e-07	COG4886	Leucine-rich repeat (LRR) protein	K13420	2e-21	100	rcu:RCOM_0633880	LRR receptor-like serine/threonine-protein kinase FLS2 [EC:2.7.11.1]	GO:0007165//signal transduction	GO:0003824//catalytic activity	GO:0009506//plasmodesma;GO:0005618//cell wall;GO:0005829//cytosol	--
Unigene26491_All	263	32	8	6.3697	1.4482	-2.13696	Down	3.19e-05	0.000155851	gi|307103011|gb|EFN51276.1|	83.6	1e-15	hypothetical protein CHLNCDRAFT_59820 [Chlorella variabilis]	gi|242383645|emb|FP092489.1|	111	4e-22	Phyllostachys edulis cDNA clone: bphyem119l23, full insert sequence	sp|P11118|CALM_EUGGR	82	7e-17	Calmodulin OS=Euglena gracilis PE=1 SV=2	SPAC3A12.14	58.2	4e-09	COG5126	Ca2+-binding protein (EF-Hand superfamily)	K02183	8e-17	83.2	ppp:PHYPADRAFT_180168	calmodulin	GO:0009846//pollen germination;GO:0019722//calcium-mediated signaling;GO:0009612//response to mechanical stimulus;GO:0010099//regulation of photomorphogenesis	GO:0005509//calcium ion binding	GO:0005773//vacuole;GO:0005886//plasma membrane;GO:0005634//nucleus	--
CL4482.Contig1_All	589	68	17	6.0439	1.3741	-2.13699	Down	1.01e-09	8.81e-09	gi|361068093|gb|AEW08358.1|	112.5	4e-24	Pinus taeda anonymous locus 2_6996_01 genomic sequence >gi|383157930|gb|AFG61314.1| Pinus taeda anonymous locus 2_6996_01 genomic sequence >gi|383157932|gb|AFG61315.1| Pinus taeda anonymous locus 2_6996_01 genomic sequence >gi|383157934|gb|AFG61316.1| Pinus taeda anonymous locus 2_6996_01 genomic sequence >gi|383157936|gb|AFG61317.1| Pinus taeda anonymous locus 2_6996_01 genomic sequence >gi|3831…	gi|270148194|gb|BT115146.1|	347	8e-93	Picea glauca clone GQ03610_C01 mRNA sequence	sp|P24068|OCS1_MAIZE	67	7e-12	Ocs element-binding factor 1 OS=Zea mays GN=OBF1 PE=2 SV=2	--	--	--	--	--	K04371	1e-17	87.8	vvi:100254083	extracellular signal-regulated kinase 1/2 [EC:2.7.11.24]	GO:0009845//seed germination;GO:0006355//regulation of transcription, DNA-dependent;GO:0009410//response to xenobiotic stimulus;GO:0030968//endoplasmic reticulum unfolded protein response	GO:0043565//sequence-specific DNA binding;GO:0003700//sequence-specific DNA binding transcription factor activity;GO:0046982//protein heterodimerization activity	-	--
CL3636.Contig1_All	1568	129	32	4.3069	0.9716	-2.14822	Down	2.52e-17	3.7e-16	gi|302793781|ref|XP_002978655.1|	225.7	1e-57	hypothetical protein SELMODRAFT_56610 [Selaginella moellendorffii] >gi|302805679|ref|XP_002984590.1| hypothetical protein SELMODRAFT_46532 [Selaginella moellendorffii] >gi|300147572|gb|EFJ14235.1| hypothetical protein SELMODRAFT_46532 [Selaginella moellendorffii] >gi|300153464|gb|EFJ20102.1| hypothetical protein SELMODRAFT_56610 [Selaginella moellendorffii]	gi|270139701|gb|BT106653.1|	77.8	3e-11	Picea glauca clone GQ03007_E02 mRNA sequence	sp|Q9S7Y1|BH030_ARATH	204	9e-53	Transcription factor bHLH30 OS=Arabidopsis thaliana GN=BHLH30 PE=1 SV=1	--	--	--	--	--	K13422	8e-08	57	gmx:100790854	transcription factor MYC2	GO:0006355//regulation of transcription, DNA-dependent	GO:0046983//protein dimerization activity	-	--
Unigene30585_All	356	190	47	27.9402	6.2855	-2.15224	Down	7.08e-25	1.44e-23	gi|383139074|gb|AFG50743.1|	96.7	1e-19	Pinus taeda anonymous locus 0_18914_01 genomic sequence	gi|383139075|gb|FJ066916.2|	157	9e-36	Pinus taeda isolate 1583 anonymous locus 0_18914_01 genomic sequence	sp|Q04108|PR04_SOLLC	89	6e-19	Pathogenesis-related leaf protein 4 OS=Solanum lycopersicum PE=2 SV=1	YJL079c	55.8	2e-08	COG2340	Uncharacterized protein with SCP/PR1 domains	K13449	3e-16	81.6	ath:AT2G14610	pathogenesis-related protein 1	GO:0009607//response to biotic stimulus;GO:0006952//defense response	-	GO:0005576//extracellular region	--
CL4333.Contig1_All	524	50	12	4.9953	1.0903	-2.19585	Down	1.06e-07	7.47e-07	gi|148910650|gb|ABR18395.1|	73.9	1e-12	unknown [Picea sitchensis]	gi|270137387|gb|BT104339.1|	75.8	4e-11	Picea glauca clone GQ02809_D01 mRNA sequence	sp|C0LGQ5|GSO1_ARATH	145	1e-35	LRR receptor-like serine/threonine-protein kinase GSO1 OS=Arabidopsis thaliana GN=GSO1 PE=2 SV=1	alr0124_1	65.5	5e-11	COG4886	Leucine-rich repeat (LRR) protein	K13420	8e-32	134	aly:ARALYDRAFT_356368	LRR receptor-like serine/threonine-protein kinase FLS2 [EC:2.7.11.1]	-	GO:0016772//transferase activity, transferring phosphorus-containing groups	GO:0016020//membrane	--
CL1127.Contig1_All	403	25	6	3.2476	0.7088	-2.19592	Down	0.00019522	0.000818395	gi|148909941|gb|ABR18056.1|	50.8	7e-06	unknown [Picea sitchensis]	--	--	--	--	sp|Q9LP24|Y1571_ARATH	107	2e-24	Probable leucine-rich repeat receptor-like protein kinase At1g35710 OS=Arabidopsis thaliana GN=At1g35710 PE=2 SV=1	MA2301_1	61.6	4e-10	COG4886	Leucine-rich repeat (LRR) protein	K13420	1e-24	109	pop:POPTR_1075175	LRR receptor-like serine/threonine-protein kinase FLS2 [EC:2.7.11.1]	-	-	GO:0016023//cytoplasmic membrane-bounded vesicle	--
CL4648.Contig1_All	1112	118	25	5.5552	1.0704	-2.37569	Down	6.95e-18	1.05e-16	gi|294460964|gb|ADE76053.1|	302	1e-80	unknown [Picea sitchensis]	gi|270137407|gb|BT104359.1|	278	1e-71	Picea glauca clone GQ02809_I03 mRNA sequence	sp|Q9LPW3|SCRM2_ARATH	241	6e-64	Transcription factor SCREAM2 OS=Arabidopsis thaliana GN=SCRM2 PE=1 SV=1	--	--	--	--	--	K13422	3e-16	84.3	gmx:100790854	transcription factor MYC2	GO:0016556//mRNA modification;GO:0010103//stomatal complex morphogenesis;GO:0006355//regulation of transcription, DNA-dependent;GO:0050826//response to freezing;GO:0010444//guard mother cell differentiation	GO:0003677//DNA binding;GO:0003700//sequence-specific DNA binding transcription factor activity	GO:0005634//nucleus	--
Unigene28458_All	450	24	5	2.7921	0.529	-2.40001	Down	0.00011925	0.000521255	gi|361066229|gb|AEW07426.1|	155.2	2e-37	Pinus taeda anonymous locus 0_1302_01 genomic sequence >gi|383140914|gb|AFG51782.1| Pinus taeda anonymous locus 0_1302_01 genomic sequence >gi|383140916|gb|AFG51783.1| Pinus taeda anonymous locus 0_1302_01 genomic sequence >gi|383140918|gb|AFG51784.1| Pinus taeda anonymous locus 0_1302_01 genomic sequence >gi|383140920|gb|AFG51785.1| Pinus taeda anonymous locus 0_1302_01 genomic sequence >gi|3831…	gi|270150731|gb|BT117617.1|	60	2e-06	Picea glauca clone GQ03905_C07 mRNA sequence	sp|Q9FX99|Y1497_ARATH	76.3	7e-15	Probable receptor-like protein kinase At1g49730 OS=Arabidopsis thaliana GN=At1g49730 PE=1 SV=1	--	--	--	--	--	K00924	3e-08	55.5	osa:4337593	[EC:2.7.1.-]	GO:0008152//metabolic process	GO:0016301//kinase activity	GO:0005886//plasma membrane	--
Unigene24352_All	396	29	6	3.8338	0.7214	-2.4099	Down	2.1e-05	0.000105565	gi|460401397|ref|XP_004246211.1|	52.4	2e-06	PREDICTED: probable receptor-like protein kinase At1g49730-like [Solanum lycopersicum]	gi|270142907|gb|BT109859.1|	216	1e-53	Picea glauca clone GQ03213_B14 mRNA sequence	sp|A8R7E6|CERK1_ARATH	49.3	7e-07	Chitin elicitor receptor kinase 1 OS=Arabidopsis thaliana GN=CERK1 PE=1 SV=1	--	--	--	--	--	K13429	6e-07	50.8	aly:ARALYDRAFT_479684	chitin elicitor receptor kinase 1	-	-	-	--
CL151.Contig5_All	636	56	11	4.6095	0.8234	-2.48494	Down	1.3e-09	1.12e-08	gi|296084223|emb|CBI24611.3|	63.2	3e-09	unnamed protein product [Vitis vinifera]	gi|270140993|gb|BT107945.1|	531	1e-148	Picea glauca clone GQ03114_N23 mRNA sequence	sp|Q9C9H7|RLP12_ARATH	112	1e-25	Receptor-like protein 12 OS=Arabidopsis thaliana GN=RLP12 PE=2 SV=2	--	--	--	--	--	K13420	2e-20	97.4	ath:AT5G46330	LRR receptor-like serine/threonine-protein kinase FLS2 [EC:2.7.11.1]	-	GO:0003824//catalytic activity	-	--
Unigene22205_All	1205	311	60	13.5114	2.3706	-2.51085	Down	1.41e-47	5.27e-46	gi|148910783|gb|ABR18458.1|	75.5	2e-12	unknown [Picea sitchensis]	gi|148910782|gb|EF678730.1|	1066	0	Picea sitchensis clone WS0297_D22 unknown mRNA	sp|Q00874|DR100_ARATH	174	7e-44	DNA-damage-repair/toleration protein DRT100 OS=Arabidopsis thaliana GN=DRT100 PE=2 SV=2	alr0124_1	85.5	2e-16	COG4886	Leucine-rich repeat (LRR) protein	K13420	1e-41	169	ath:AT5G46330	LRR receptor-like serine/threonine-protein kinase FLS2 [EC:2.7.11.1]	GO:0007165//signal transduction	-	GO:0009506//plasmodesma;GO:0005618//cell wall;GO:0005829//cytosol	--
Unigene25680_All	507	40	7	4.1303	0.6573	-2.65162	Down	1.16e-07	8.09e-07	gi|462415958|gb|EMJ20695.1|	148.7	3e-35	hypothetical protein PRUPE_ppa022287mg [Prunus persica]	gi|270150438|gb|BT117324.1|	521	1e-145	Picea glauca clone GQ03817_C13 mRNA sequence	sp|Q93WY4|WRK12_ARATH	135	1e-32	Probable WRKY transcription factor 12 OS=Arabidopsis thaliana GN=WRKY12 PE=2 SV=1	--	--	--	--	--	K13424	3e-18	89.4	zma:100279301	WRKY transcription factor 33	GO:0009718//anthocyanin-containing compound biosynthetic process;GO:0006355//regulation of transcription, DNA-dependent	GO:0043565//sequence-specific DNA binding;GO:0003700//sequence-specific DNA binding transcription factor activity	GO:0005634//nucleus	--
CL255.Contig2_All	456	37	6	4.2478	0.6264	-2.76156	Down	1.93e-07	1.31e-06	gi|116788340|gb|ABK24841.1|	120.9	6e-27	unknown [Picea sitchensis]	gi|270145447|gb|BT112399.1|	137	1e-29	Picea glauca clone GQ03314_I12 mRNA sequence	sp|C0LGT6|EFR_ARATH	107	3e-24	LRR receptor-like serine/threonine-protein kinase EFR OS=Arabidopsis thaliana GN=EFR PE=1 SV=1	--	--	--	--	--	K13428	7e-24	107	ath:AT5G20480	LRR receptor-like serine/threonine-protein kinase EFR [EC:2.7.11.1]	GO:0031348//negative regulation of defense response;GO:0009867//jasmonic acid mediated signaling pathway;GO:0009697//salicylic acid biosynthetic process;GO:0009862//systemic acquired resistance, salicylic acid mediated signaling pathway;GO:0010363//regulation of plant-type hypersensitive response;GO:0010310//regulation of hydrogen peroxide metabolic process;GO:0016045//detection of bacterium;GO:0…	GO:0019199//transmembrane receptor protein kinase activity;GO:0005515//protein binding;GO:0000166//nucleotide binding;GO:0004674//protein serine/threonine kinase activity	GO:0016020//membrane;GO:0044464//cell part	--
Unigene24580_All	580	36	5	3.2494	0.4104	-2.98507	Down	9.14e-08	6.49e-07	gi|60327196|gb|AAX19021.1|	70.5	1e-11	Cf-2.3 [Solanum pimpinellifolium]	--	--	--	--	sp|Q9LP24|Y1571_ARATH	153	7e-38	Probable leucine-rich repeat receptor-like protein kinase At1g35710 OS=Arabidopsis thaliana GN=At1g35710 PE=2 SV=1	alr0124_1	84.3	1e-16	COG4886	Leucine-rich repeat (LRR) protein	K13420	2e-33	140	sbi:SORBI_06g028760	LRR receptor-like serine/threonine-protein kinase FLS2 [EC:2.7.11.1]	GO:0009814//defense response, incompatible interaction;GO:0000165//MAPK cascade	GO:0004672//protein kinase activity	GO:0016020//membrane	--
Unigene24195_All	836	117	16	7.3267	0.9112	-3.00732	Down	1.44e-22	2.69e-21	gi|224284251|gb|ACN39861.1|	171.4	1e-41	unknown [Picea sitchensis]	gi|270135605|gb|BT102557.1|	71.9	1e-09	Picea glauca clone GQ0196_I06 mRNA sequence	sp|Q40392|TMVRN_NICGU	64.3	8e-11	TMV resistance protein N OS=Nicotiana glutinosa GN=N PE=1 SV=1	--	--	--	--	--	K03013	1e-07	55.1	vvi:100258335	DNA-directed RNA polymerases I, II, and III subunit RPABC1	-	-	-	--
CL461.Contig2_All	768	1165	158	79.4128	9.7946	-3.01931	Down	1.3e-211	2.4e-209	gi|148910622|gb|ABR18381.1|	277.7	1e-73	unknown [Picea sitchensis]	gi|270143179|gb|BT110131.1|	450	1e-123	Picea glauca clone GQ03216_M11 mRNA sequence	sp|P35793|PR13_HORVU	182	2e-46	Pathogenesis-related protein PRB1-3 OS=Hordeum vulgare PE=2 SV=1	YKR013w	107	2e-23	COG2340	Uncharacterized protein with SCP/PR1 domains	K13449	2e-48	190	rcu:RCOM_1381930	pathogenesis-related protein 1	-	-	GO:0005576//extracellular region	--
Unigene23850_All	749	342	38	23.904	2.4154	-3.30692	Down	5.1e-69	2.74e-67	gi|357479771|ref|XP_003610171.1|	216.5	3e-55	Cysteine-rich secretory protein LCCL domain-containing [Medicago truncatula] >gi|355511226|gb|AES92368.1| Cysteine-rich secretory protein LCCL domain-containing [Medicago truncatula]	gi|270139481|gb|BT106433.1|	636	1e-180	Picea glauca clone GQ03001_J14 mRNA sequence	sp|Q40374|PR1_MEDTR	199	2e-51	Pathogenesis-related protein PR-1 OS=Medicago truncatula GN=PR-1 PE=2 SV=1	YJL078c_1	84	2e-16	COG2340	Uncharacterized protein with SCP/PR1 domains	K13449	5e-41	166	vvi:100258414	pathogenesis-related protein 1	GO:0050896//response to stimulus	-	GO:0005576//extracellular region	--
Unigene26534_All	203	15	1	3.8683	0.2345	-4.04404	Down	0.000131533	0.000568175	gi|104642235|gb|ABF73316.1|	72	3e-12	clavata-like receptor [Picea glauca]	--	--	--	--	sp|P93194|RPK1_IPONI	65.5	7e-12	Receptor-like protein kinase OS=Ipomoea nil GN=INRPK1 PE=2 SV=2	--	--	--	--	--	K13420	6e-10	60.5	ath:AT5G46330	LRR receptor-like serine/threonine-protein kinase FLS2 [EC:2.7.11.1]	GO:0044763;GO:0044767;GO:0048513//organ development;GO:0050794//regulation of cellular process;GO:0009653//anatomical structure morphogenesis	GO:0016772//transferase activity, transferring phosphorus-containing groups	-	--
Unigene26408_All	709	167	8	12.3309	0.5372	-4.52067	Down	1.75e-43	6.01e-42	gi|116781603|gb|ABK22175.1|	320.5	1e-86	unknown [Picea sitchensis]	gi|383129207|gb|FJ057194.2|	69.9	3e-09	Pinus taeda isolate 4667 anonymous locus 0_15252_01 genomic sequence	sp|Q40374|PR1_MEDTR	198	2e-51	Pathogenesis-related protein PR-1 OS=Medicago truncatula GN=PR-1 PE=2 SV=1	YJL078c_1	95.9	6e-20	COG2340	Uncharacterized protein with SCP/PR1 domains	K13449	2e-39	160	vvi:100258414	pathogenesis-related protein 1	GO:0050896//response to stimulus	-	GO:0005576//extracellular region	--
Unigene26640_All	339	47	0	7.2581	0	-12.8254	Down	6.89e-16	9.38e-15	gi|2224913|gb|AAB61709.1|	62.8	1e-09	beta-expansin [Arabidopsis thaliana]	gi|270137294|gb|BT104246.1|	113	1e-22	Picea glauca clone GQ02808_D15 mRNA sequence	sp|Q9SKU2|EXPB1_ARATH	62.8	5e-11	Expansin-B1 OS=Arabidopsis thaliana GN=EXPB1 PE=2 SV=1	--	--	--	--	--	K13448	5e-06	47.4	ath:AT3G03000	calcium-binding protein CML	GO:0009664//plant-type cell wall organization;GO:0009653//anatomical structure morphogenesis;GO:0044767	-	GO:0009536//plastid	--

## Sheet: Table S7
Table S7. Unigene primers used for qRT-PCR analysis
unigene	primers used for qRT-PCR analysis
α-tubulin（CL5278.Contig1_All）	F: AAGATTATGAAGAGGTCGGAGCAG
	R: ATCCCCACCAGTACTACCTATCAA
CL2769.Contig1_All	F: TATGGACGCTCAGATGATGC
	R: GTTTGTTCTCCGTAGCCGTT
CL1210.Contig2_All	F: GAAAGCCTTGGCATGGTAGAAA
	R: AGGGCAAATCCGACGACACT
Unigene11797_All	F: GGAACTGCCGACGAATGGAT
	R: AGTCATCGAAAACCCCACGC
CL3623.Contig1_All	F: TTAAGCAGCTTGTTGCAGACCTC
	R: CATGTTTGAAACCGTGCCCTC
CL2502.Contig2_All	F: GAAGGAAAATCGCTCACAATCG
	R: GCATGTTTTGCAGAACCCAAGTAG
CL1102.Contig4_All	F: AGATGGTTGAAGTCGGGATGG
	R: TGGTAGCGATGTTGTTGATGCT
CL769.Contig3_All	F: CATGCTTGGGGCGTCATATC
	R: CGCTAATCGTTCCATTGCTGT
Unigene18710_All	F: CTAAATGCCCATTGCGGGGT
	R: TTGGCCTGAAGCTTGAACGG
CL2769.Contig2_All	F: AGCAGCGTCTCGTAGAACCG
	R: CTCGGATATGTGTTGTTTC
Unigene19806_All	F: TTGAAGGGCAGTTAGGGATTTG
	R:GCATTCTCATAAACGCTGGCT
Unigene30469_All	F: GAGTGGCAAACGTTGGAATG
	R: CCAGGTGGGTAGTAATTGCA
CL5322.Contig2_All	F: AATCCAGGACGAAGCTGACA
	R: ATGAGTACTGTCCGCCATTG
Unigene30477_All	F: ACTGCACATCACTCCAGTAC
	R: TGTGGTATGCTCCCTGTAAG
Unigene10916_All	F: GCCTTCCTCCAGCCTCATC
	R: GGGAAGCTCTTGGCTTAGTT
Unigene22378_All	F: TGCAGCTTCGGTTCAAGATG
	R: GTTAAGCTACAATCCCACCG
